# Supplementary material for: What work-related exposures are associated with post-traumatic stress disorder? A systematic review with meta-analysis
Source: HighWire-hosted journal article supplement (doi:10.1136/bmjopen-2021-049651), 2021-08-01
Supplement: bmjopen-2021-049651supp001_data_supplement.pdf [file bmjopen-2021-049651supp001_data_supplement.pdf]

## Supplementary file 1.

| <b>Ovid MEDLINE(R) ALL &lt;1946 to September 09, 2019&gt;. Search date: 10 September 2019</b> |                                                                                                                                                                                                                                                                                                                                                                                                                                                                                                                                                                                                                                                                         |                |
|-----------------------------------------------------------------------------------------------|-------------------------------------------------------------------------------------------------------------------------------------------------------------------------------------------------------------------------------------------------------------------------------------------------------------------------------------------------------------------------------------------------------------------------------------------------------------------------------------------------------------------------------------------------------------------------------------------------------------------------------------------------------------------------|----------------|
| <b>#</b>                                                                                      | <b>Search</b>                                                                                                                                                                                                                                                                                                                                                                                                                                                                                                                                                                                                                                                           | <b>Results</b> |
| 1                                                                                             | stress disorders, post-traumatic/ or stress disorders, traumatic, acute/                                                                                                                                                                                                                                                                                                                                                                                                                                                                                                                                                                                                | 30925          |
| 2                                                                                             | (acute stress or (asd and stress) or ptsd or ptss or posttraumatic stress or post traumatic stress or acute stress disorder or posttraumatic symptom? or post traumatic symptom? or traumatic stress).ab,kf,ti,sh.                                                                                                                                                                                                                                                                                                                                                                                                                                                      | 42697          |
| 3                                                                                             | (htsq or trauma screen* or (trauma screen* and stress)).ab,kf,ti. [trauma screening zoals de Harvard Trauma Screening Questionnaire - htsq]                                                                                                                                                                                                                                                                                                                                                                                                                                                                                                                             | 160            |
| 4                                                                                             | or/1-3 [ptsd]                                                                                                                                                                                                                                                                                                                                                                                                                                                                                                                                                                                                                                                           | 51153          |
| 5                                                                                             | exp Occupations/ or Workload/ or exp Work/ or Workplace/ or exp Occupational Diseases/ or Rehabilitation, Vocational/ or Occupational Health/ or Sick Leave/ or Absenteeism/ or Retirement/ or workers' compensation/ or exp Employment/ or exp Occupational Exposure/ or Volunteers/                                                                                                                                                                                                                                                                                                                                                                                   | 361332         |
| 6                                                                                             | (worka* or worke* or workg* or worki* or workl* or workp* or work capacity or work disabilit* or work abilit* or at work or work exposure or work related or workers or job* or employee or staff or personnel or occupation or occupations or occupational or outdoor work* or day shift* or night shift* or shift work* or vocational rehabilitation or sick leave or absenteeism or sickness absen* or absente* or presente* or "return to work" or vocational reintegration or retirement or pension or employment or unemployed or unemployment or work status or industries or industrial sector or volunteer* or voluntary worker* or repetitive work).ab,kf,ti. | 2038626        |
| 7                                                                                             | exp "personnel, hospital"/ or exp emergency responders/                                                                                                                                                                                                                                                                                                                                                                                                                                                                                                                                                                                                                 | 100417         |
| 8                                                                                             | (residents or emergency responder? or first responder? or firefighter? or fire fighter? or Police officer? or emergency medicals or Armed forces or paramedics or veterans or Journalist?).ab,kf,ti.                                                                                                                                                                                                                                                                                                                                                                                                                                                                    | 147998         |
| 9                                                                                             | or/5-8 [work]                                                                                                                                                                                                                                                                                                                                                                                                                                                                                                                                                                                                                                                           | 2360997        |
| 10                                                                                            | Epidemiologic studies/                                                                                                                                                                                                                                                                                                                                                                                                                                                                                                                                                                                                                                                  | 8073           |
| 11                                                                                            | exp case control studies/                                                                                                                                                                                                                                                                                                                                                                                                                                                                                                                                                                                                                                               | 1016792        |
| 12                                                                                            | exp cohort studies/                                                                                                                                                                                                                                                                                                                                                                                                                                                                                                                                                                                                                                                     | 1894888        |
| 13                                                                                            | Case control.tw.                                                                                                                                                                                                                                                                                                                                                                                                                                                                                                                                                                                                                                                        | 118051         |
| 14                                                                                            | (cohort adj (study or studies)).tw.                                                                                                                                                                                                                                                                                                                                                                                                                                                                                                                                                                                                                                     | 183886         |
| 15                                                                                            | Cohort analy\$.tw.                                                                                                                                                                                                                                                                                                                                                                                                                                                                                                                                                                                                                                                      | 7241           |
| 16                                                                                            | (Follow up adj (study or studies)).tw.                                                                                                                                                                                                                                                                                                                                                                                                                                                                                                                                                                                                                                  | 47481          |
| 17                                                                                            | (observational adj (study or studies)).tw.                                                                                                                                                                                                                                                                                                                                                                                                                                                                                                                                                                                                                              | 95892          |
| 18                                                                                            | Longitudinal.tw.                                                                                                                                                                                                                                                                                                                                                                                                                                                                                                                                                                                                                                                        | 227916         |
| 19                                                                                            | or/10-17 [observationele- en longitudinale studies]                                                                                                                                                                                                                                                                                                                                                                                                                                                                                                                                                                                                                     | 2269321        |
| 20                                                                                            | (risk or predict*).mp.                                                                                                                                                                                                                                                                                                                                                                                                                                                                                                                                                                                                                                                  | 3563653        |
| 21                                                                                            | 19 or 20                                                                                                                                                                                                                                                                                                                                                                                                                                                                                                                                                                                                                                                                | 4936872        |
| 22                                                                                            | and/4,9,21                                                                                                                                                                                                                                                                                                                                                                                                                                                                                                                                                                                                                                                              | 6387           |
| 23                                                                                            | limit 22 to yr="2010-current"                                                                                                                                                                                                                                                                                                                                                                                                                                                                                                                                                                                                                                           | 4319           |

| <b>Ovid Embase Classic+Embase &lt;1947 to 2019 September 09&gt;. Search date: 10 September 2019</b> |                                                                                                                                                                                     |                |
|-----------------------------------------------------------------------------------------------------|-------------------------------------------------------------------------------------------------------------------------------------------------------------------------------------|----------------|
| <b>#</b>                                                                                            | <b>Search</b>                                                                                                                                                                       | <b>Results</b> |
| 1                                                                                                   | *posttraumatic stress disorder/ or *acute stress disorder/                                                                                                                          | 30071          |
| 2                                                                                                   | (acute stress or (asd and stress) or ptsd or ptss or posttraumatic stress or post traumatic stress or acute stress disorder or posttraumatic symptom? or post traumatic symptom? or | 56167          |

|    |                                                                                                                                                                                                                                                                                                                                                                                                                                                                                                                                                                                                                                                                         |         |
|----|-------------------------------------------------------------------------------------------------------------------------------------------------------------------------------------------------------------------------------------------------------------------------------------------------------------------------------------------------------------------------------------------------------------------------------------------------------------------------------------------------------------------------------------------------------------------------------------------------------------------------------------------------------------------------|---------|
|    | traumatic stress).ab,kw,ti.                                                                                                                                                                                                                                                                                                                                                                                                                                                                                                                                                                                                                                             |         |
| 3  | (htsq or trauma screen* or (trauma screen* and stress)).ab,kw,ti.                                                                                                                                                                                                                                                                                                                                                                                                                                                                                                                                                                                                       | 199     |
| 4  | or/1-3 [ptsd]                                                                                                                                                                                                                                                                                                                                                                                                                                                                                                                                                                                                                                                           | 60673   |
| 5  | exp *Occupation/ or exp *occupational health/ or exp *work/ or *Volunteer/ or exp *named groups by occupation/                                                                                                                                                                                                                                                                                                                                                                                                                                                                                                                                                          | 907358  |
| 6  | (worka* or worke* or workg* or worki* or worlk* or workp* or work capacity or work disabilit* or work abilit* or at work or work exposure or work related or workers or job* or employee or staff or personnel or occupation or occupations or occupational or outdoor work* or day shift* or night shift* or shift work* or vocational rehabilitation or sick leave or absenteeism or sickness absen* or absente* or presente* or "return to work" or vocational reintegration or retirement or pension or employment or unemployed or unemployment or work status or industries or industrial sector or volunteer* or voluntary worker* or repetitive work).ab,kw,ti. | 3266921 |
| 7  | exp *hospital personnel/ or rescue personnel/                                                                                                                                                                                                                                                                                                                                                                                                                                                                                                                                                                                                                           | 46527   |
| 8  | (residents or emergency responder? or first responder? or firefighter? or fire fighter? or Police officer? or emergency medicals or Armed forces or paramedics or veterans or Journalist?).ab,kw,ti.                                                                                                                                                                                                                                                                                                                                                                                                                                                                    | 195059  |
| 9  | or/5-8 [work]                                                                                                                                                                                                                                                                                                                                                                                                                                                                                                                                                                                                                                                           | 3981638 |
| 10 | *Clinical study/                                                                                                                                                                                                                                                                                                                                                                                                                                                                                                                                                                                                                                                        | 56379   |
| 11 | *Case control study/                                                                                                                                                                                                                                                                                                                                                                                                                                                                                                                                                                                                                                                    | 6905    |
| 12 | *Family study/                                                                                                                                                                                                                                                                                                                                                                                                                                                                                                                                                                                                                                                          | 2834    |
| 13 | *Longitudinal study/                                                                                                                                                                                                                                                                                                                                                                                                                                                                                                                                                                                                                                                    | 7151    |
| 14 | *Retrospective study/                                                                                                                                                                                                                                                                                                                                                                                                                                                                                                                                                                                                                                                   | 19751   |
| 15 | *Prospective study/                                                                                                                                                                                                                                                                                                                                                                                                                                                                                                                                                                                                                                                     | 21494   |
| 16 | Randomized controlled trials/                                                                                                                                                                                                                                                                                                                                                                                                                                                                                                                                                                                                                                           | 168154  |
| 17 | 15 not 16                                                                                                                                                                                                                                                                                                                                                                                                                                                                                                                                                                                                                                                               | 21378   |
| 18 | *Cohort analysis/                                                                                                                                                                                                                                                                                                                                                                                                                                                                                                                                                                                                                                                       | 26124   |
| 19 | (Cohort adj (study or studies)).mp.                                                                                                                                                                                                                                                                                                                                                                                                                                                                                                                                                                                                                                     | 275760  |
| 20 | (Case control adj (study or studies)).tw.                                                                                                                                                                                                                                                                                                                                                                                                                                                                                                                                                                                                                               | 126673  |
| 21 | (follow up adj (study or studies)).tw.                                                                                                                                                                                                                                                                                                                                                                                                                                                                                                                                                                                                                                  | 66352   |
| 22 | (observational adj (study or studies)).tw.                                                                                                                                                                                                                                                                                                                                                                                                                                                                                                                                                                                                                              | 151582  |
| 23 | (epidemiologic\$ adj (study or studies)).tw.                                                                                                                                                                                                                                                                                                                                                                                                                                                                                                                                                                                                                            | 106051  |
| 24 | or/10-15,17-23                                                                                                                                                                                                                                                                                                                                                                                                                                                                                                                                                                                                                                                          | 799536  |
| 25 | (risk or predict*).mp.                                                                                                                                                                                                                                                                                                                                                                                                                                                                                                                                                                                                                                                  | 5152294 |
| 26 | 24 or 25                                                                                                                                                                                                                                                                                                                                                                                                                                                                                                                                                                                                                                                                | 5545704 |
| 27 | and/4,9,26                                                                                                                                                                                                                                                                                                                                                                                                                                                                                                                                                                                                                                                              | 7053    |
| 28 | limit 27 to yr="2010-current"                                                                                                                                                                                                                                                                                                                                                                                                                                                                                                                                                                                                                                           | 5366    |

| <b>Ovid PsycINFO &lt;1806 to September Week 1 2019&gt;. Search date: 10 September 2019</b> |                                                                                                                                                                                                                 |                |
|--------------------------------------------------------------------------------------------|-----------------------------------------------------------------------------------------------------------------------------------------------------------------------------------------------------------------|----------------|
| <b>#</b>                                                                                   | <b>Search</b>                                                                                                                                                                                                   | <b>Results</b> |
| 1                                                                                          | posttraumatic stress disorder/ or acute stress disorder/                                                                                                                                                        | 31361          |
| 2                                                                                          | (acute stress or (asd and stress) or ptsd or ptss or posttraumatic stress or post traumatic stress or acute stress disorder or posttraumatic symptom? or post traumatic symptom? or traumatic stress).ab,id,ti. | 49013          |
| 3                                                                                          | (htsq or trauma screen* or (trauma screen* and stress)).ab,id,ti,tm.                                                                                                                                            | 292            |
| 4                                                                                          | or/1-3 [ptsd]                                                                                                                                                                                                   | 50242          |

|    |                                                                                                                                                                                                                                                                                                                                                                                                                                                                                                                                                                                                                                                                         |        |
|----|-------------------------------------------------------------------------------------------------------------------------------------------------------------------------------------------------------------------------------------------------------------------------------------------------------------------------------------------------------------------------------------------------------------------------------------------------------------------------------------------------------------------------------------------------------------------------------------------------------------------------------------------------------------------------|--------|
| 5  | exp occupations/ or exp occupational health/ or occupational status/                                                                                                                                                                                                                                                                                                                                                                                                                                                                                                                                                                                                    | 59891  |
| 6  | (worka* or worke* or workg* or worki* or workl* or workp* or work capacity or work disabilit* or work abilit* or at work or work exposure or work related or workers or job* or employee or staff or personnel or occupation or occupations or occupational or outdoor work* or day shift* or night shift* or shift work* or vocational rehabilitation or sick leave or absenteeism or sickness absen* or absente* or presente* or "return to work" or vocational reintegration or retirement or pension or employment or unemployed or unemployment or work status or industries or industrial sector or volunteer* or voluntary worker* or repetitive work).ab,id,ti. | 866191 |
| 7  | exp medical personnel/ or exp emergency personnel/                                                                                                                                                                                                                                                                                                                                                                                                                                                                                                                                                                                                                      | 89105  |
| 8  | (residents or emergency responder? or first responder? or firefighter? or fire fighter? or Police officer? or emergency medicals or Armed forces or paramedics or veterans or Journalist?).ab,id,ti.                                                                                                                                                                                                                                                                                                                                                                                                                                                                    | 68300  |
| 9  | or/5-8 [work]                                                                                                                                                                                                                                                                                                                                                                                                                                                                                                                                                                                                                                                           | 972972 |
| 10 | (Clinical stud* or Case control stud* or Longitudinal stud* or Retrospective stud* or (Prospective stud* not (Randomized controlled trials or rct)) or Cohort analysis or (Cohort adj (study or studies)) or (Case control adj (study or studies)) or (follow up adj (study or studies)) or (observational adj (study or studies)) or (epidemiologic\$ adj (study or studies))).ab,id,ti.                                                                                                                                                                                                                                                                               | 136663 |
| 11 | (risk or predict*).mp.                                                                                                                                                                                                                                                                                                                                                                                                                                                                                                                                                                                                                                                  | 730689 |
| 12 | 10 or 11                                                                                                                                                                                                                                                                                                                                                                                                                                                                                                                                                                                                                                                                | 808563 |
| 13 | and/4,9,12                                                                                                                                                                                                                                                                                                                                                                                                                                                                                                                                                                                                                                                              | 5417   |
| 14 | limit 13 to yr="2010-current"                                                                                                                                                                                                                                                                                                                                                                                                                                                                                                                                                                                                                                           | 3711   |

| ProQuest PTSDhubs. Search date: 10 September 2019 |                                                                                                                                                                                                                                                                                                                                                                                                                                                                                                                                                                                                                                                                                                                                                                                                                                                                                                                                                                                                                                                                                                                                                                                        |         |
|---------------------------------------------------|----------------------------------------------------------------------------------------------------------------------------------------------------------------------------------------------------------------------------------------------------------------------------------------------------------------------------------------------------------------------------------------------------------------------------------------------------------------------------------------------------------------------------------------------------------------------------------------------------------------------------------------------------------------------------------------------------------------------------------------------------------------------------------------------------------------------------------------------------------------------------------------------------------------------------------------------------------------------------------------------------------------------------------------------------------------------------------------------------------------------------------------------------------------------------------------|---------|
| #                                                 | Search                                                                                                                                                                                                                                                                                                                                                                                                                                                                                                                                                                                                                                                                                                                                                                                                                                                                                                                                                                                                                                                                                                                                                                                 | Results |
| 1                                                 | (su((worka* OR worke* OR workg* OR worki* OR workl* OR workp* OR work capacity OR work disabilit* OR work abilit* OR at work OR work exposure OR work related OR workers OR job* OR employee OR staff OR personnel OR occupation OR occupations OR occupational OR outdoor work* OR day shift* OR night shift* OR shift work* OR vocational rehabilitation OR sick leave OR absenteeism OR sickness absen* OR absente* OR presente* OR "return to work" OR vocational reintegration OR retirement OR pension OR employment OR unemployed OR unemployment OR work status OR industries OR industrial sector OR volunteer* OR voluntary worker* OR repetitive work)) OR su((residents OR emergency responder? OR first responder? OR firefighter? OR fire fighter? OR Police officer? OR emergency medicals OR Armed forces OR paramedics OR veterans OR Journalist?))) AND (su(risk OR predict*) OR su((Clinical stud* OR Case control stud* OR Longitudinal stud* OR Retrospective stud* OR (Prospective stud* NOT (Randomized controlled trials OR rct)) OR Cohort analysis OR Cohort stud* OR Case control stud* OR follow up stud* OR observational stud* OR epidemiologic stud*))) | 1849    |
| 2                                                 | Limit 1 to publication date = 2010-01-01 / 2019-09-10                                                                                                                                                                                                                                                                                                                                                                                                                                                                                                                                                                                                                                                                                                                                                                                                                                                                                                                                                                                                                                                                                                                                  | 1133    |
