# Supplementary material for: What work-related exposures are associated with post-traumatic stress disorder? A systematic review with meta-analysis
Source: PubMed Central journal article supplement — BMJ Open. 2021 Aug 25;11(8):e049651. doi: 10.1136/bmjopen-2021-049651 (PMC8388294; doi:10.1136/bmjopen-2021-049651), 2021-08-25
Supplement: bmjopen-2021-049651supp002.pdf [file bmjopen-2021-049651supp002.pdf]

## Supplementary file 2. Excluded articles

| Article                                                                                                                                                                                                                                                                                | Reason for exclusion         | No papers |
|----------------------------------------------------------------------------------------------------------------------------------------------------------------------------------------------------------------------------------------------------------------------------------------|------------------------------|-----------|
| 1. Amiri T. Occupational posttraumatic stress disorder: Latent structure and risk pathways. 2019, Dissertation Abstracts International, 80(4).                                                                                                                                         | Conference abstract          | 1         |
| 2. Chin WS, Shiao JSC, Liao SC, Kuo CY, Chen CC, Guo YL. Psychiatric diseases at six years after occupational injuries. 2016. Occupational and Environmental Medicine, 73: A175.                                                                                                       | Conference abstract          | 2         |
| 3. Connorton E, Miller M, Perry MJ, Hemenway D. Mental health and combat, peacekeeping, or relief work: Results from the National Comorbidity Survey Replication. 2011. Comprehensive Psychiatry, 52: E4.                                                                              | Conference abstract          | 3         |
| 4. Geronazzo AL, Shen S, Duarte CS, Wu P, Lord E, Amsel L, Musa GJ, Wicks J, Yip J, Fan B, Guffanti G, Hoven CW. Cumulative exposure to work-related incidents and current posttraumatic stress disorder in new york city's first responders. 2013. European Psychiatry Conference.    | Conference abstract          | 4         |
| 5. Goldmann E, Tamburrino M, Liberzon I, Slembariski R, Prescott MR, Calabrese J Galea S. Pre-, peri-, and post-deployment characteristics and risk of posttraumatic stress disorder among ohio national guard soldiers. 2010. American Journal of Epidemiology, 11: S90.              | Conference abstract          | 5         |
| 6. Goodwin L, Jones M, Sundin J, Wessely S, Rona RJ, Fear NT. Prevalence and predictors of delayed onset PTSD in military personnel: Is there evidence for this disorder? Results of a prospective UK cohort study. 2011. Occupational and Environmental Medicine, 1351-0711, 1, A100. | Conference abstract          | 6         |
| 7. Herrell R, Wilk J, Bliese P, Hoge C. Combat intensity, psychopathology, and suicidal ideation in a population of soldiers after deployment to Iraq. 2011. Comprehensive Psychiatry, 52: E8.                                                                                         | Conference abstract          | 7         |
| 8. Herrell RK, Bliese PA, Hoge CW. Effect of combat intensity, depression, alcohol misuse, and family history of depression and alcohol misuse on PTSD in a sample of post-deployment US Soldiers. 2013. Comprehensive Psychiatry, 54: E4-E5.                                          | Conference abstract          | 8         |
| 9. Herrell RK, Bliese PB, Hoge CW. Number of deployments and total months of deployment as predictors of post-traumatic stress disorder in active duty soldiers. 2011. American Journal of Epidemiology, 11: S289.                                                                     | Conference abstract          | 9         |
| 10. Horesh D, Solomon Z, Ein-Dor T. Delayed-onset PTSD following combat: The role of social resources. 2013. Comprehensive Psychiatry, 54: e24.                                                                                                                                        | Conference abstract          | 10        |
| 11. Kim AR, Sung JH, Cho SW, Jeong KS, Ahn YS. The relationship between the post-traumatic stress syndrome and the occupational stress among the firefighters in Korea. 2018. Occupational and Environmental Medicine, 75: A380.                                                       | Conference abstract          | 11        |
| 12. Pierce MD, Wood MD, Reddy M, Sevin E, Shea MT. A prospective examination of posttraumatic stress and alcohol use disorders among returning veterans. 2012. Alcoholism: Clinical and Experimental Research, 1: 303A.                                                                | Conference abstract          | 12        |
| 13. Subramaney U. Personality, trauma exposure, PTSD and depression in a cohort of SA metro policemen: A longitudinal study. 2010. South African Journal of Psychiatry, 16: 97-98.                                                                                                     | Conference abstract          | 13        |
| 14. Huang, D, Wang X, Kung WW. The impact of job loss on posttraumatic stress disorder among Asian Americans: 11-12 years after the World Trade Center attack. 2019. Traumatology, 1085-9373.                                                                                          | Full text could not be found | 1         |
| 15. Andersen SB, Karstoft KI, Bertelsen M, Madsen T. Latent trajectories of trauma symptoms and resilience: the 3-year longitudinal prospective USPER study of Danish veterans deployed in Afghanistan. 2014. Journal of Clinical Psychiatry, 75(9): 1001-1008.                        | No PTSD incidence            | 1         |
| 16. Armstrong D, Shakespeare-Finch J, Shochet I. Predicting post-traumatic growth and post-traumatic stress in firefighters. 2014. Australian Journal of Psychology, 66(1): 38-46.                                                                                                     | No PTSD incidence            | 2         |
| 17. Boasso AM, Steenkamp MM, Nash, WP, Larson JL, Litz BT. The relationship between course of PTSD symptoms in deployed U.S. Marines and degree of combat exposure. 2015. Journal of Traumatic Stress, 28(1): 73-78.                                                                   | No PTSD incidence            | 3         |
| 18. Bowler RM, Harris M, Li J, Gocheva V, Stellman SD, Wilson K, Alper H, Schwarzer R,                                                                                                                                                                                                 | No PTSD                      | 4         |

|                                                                                                                                                                                                                                                                                                                                                                           |                   |    |
|---------------------------------------------------------------------------------------------------------------------------------------------------------------------------------------------------------------------------------------------------------------------------------------------------------------------------------------------------------------------------|-------------------|----|
| Cone JE. Longitudinal mental health impact among police responders to the 9/11 terrorist attack. 2012. <i>American Journal of Industrial Medicine</i> , 55(4): 297-312.                                                                                                                                                                                                   | incidence         |    |
| 19. Chin WD, Shiao JS, Liao SC, Kuo CY, Chen CC, Guo YL. Depressive, anxiety and post-traumatic stress disorders at six years after occupational injuries. 2017. <i>European Archives of Psychiatry &amp; Clinical Neuroscience</i> , 267(6): 507-516.                                                                                                                    | No PTSD incidence | 5  |
| 20. Eriksson CB, Lopes Cardozo B, Foy DW, Sabin M, Ager A, Snider L, Scholte WF, Kaiser R, Olf M, Rijnen B, Crawford CG, Zhu J, Simon W. Predeployment mental health and trauma exposure of expatriate humanitarian aid workers: Risk and resilience factors. 2013. <i>Traumatology</i> , 19(1): 41-48.                                                                   | No PTSD incidence | 6  |
| 21. Garcia FE, Vazquez C, Inostroza C. Predictors of post-traumatic stress symptoms following occupational accidents: A longitudinal study. 2019. <i>Anxiety, Stress, &amp; Coping</i> , 32(2): 168-178.                                                                                                                                                                  | No PTSD incidence | 7  |
| 22. Hartley TA, Violanti JM, Sarkisian K, Andrew ME, Burchfiel CM. PTSD symptoms among police officers: associations with frequency, recency, and types of traumatic events. 2013. <i>International Journal of Emergency Mental Health</i> , 15(4): 241-253.                                                                                                              | No PTSD incidence | 8  |
| 23. Huang H, Kashubeck-West S. Exposure, agency, perceived threat, and guilt as predictors of posttraumatic stress disorder in veterans. 2015. <i>Journal of Counseling &amp; Development</i> , 93(1): 3-13.                                                                                                                                                              | No PTSD incidence | 9  |
| 24. Jaegers LA, Matthieu MM, Vaughn MG, Werth P, Katz IM, Ahmad SO. Posttraumatic Stress Disorder and Job Burnout Among Jail Officers. 2019. <i>Journal of Occupational &amp; Environmental Medicine</i> , 61(6): 505-510.                                                                                                                                                | No PTSD incidence | 10 |
| 25. Mac Donald CL, Johnson AM, Wierzechowski L, Kassner E, Stewart T, Nelson EC, Werner NJ, Zonies D, Oh J, Fang R, Brody DL. Prospectively assessed clinical outcomes in concussive blast vs nonblast traumatic brain injury among evacuated US military personnel. 2014. <i>JAMA Neurology</i> , 71(8): 994-1002.                                                       | No PTSD incidence | 11 |
| 26. Magruder KM, Goldberg J, Forsberg CW, Friedman MJ, Litz BT, Vaccarino V, Heagerty PJ, Gleason TC, Huang GD, Smith NL. Long-Term Trajectories of PTSD in Vietnam-Era Veterans: The Course and Consequences of PTSD in Twins. 2016. <i>Journal of Traumatic Stress</i> , 29(1): 5-16.                                                                                   | No PTSD incidence | 12 |
| 27. Marchand A, Nadeau C, Beaulieu-Prevost D, Boyer R, Martin M. Predictors of posttraumatic stress disorder among police officers: A prospective study. 2015. <i>Psychological Trauma: Theory, Research, Practice and Policy</i> , 7(3): 212-221.                                                                                                                        | No PTSD incidence | 13 |
| 28. Nash WP, Boasso AM, Steenkamp MM, Larson JL, Lubin RE, Litz BT. Posttraumatic stress in deployed marines: Prospective trajectories of early adaptation. 2015. <i>Journal of Abnormal Psychology</i> , 124(1): 155-171.                                                                                                                                                | No PTSD incidence | 14 |
| 29. Polusny MA, Kumpula MJ, Meis LA, Erbes CR, Arbisi PA, Murdoch M, Thuras P, Kehle-Forbes SM, Johnson AK. Gender differences in the effects of deployment-related stressors and pre-deployment risk factors on the development of PTSD symptoms in National Guard Soldiers deployed to Iraq and Afghanistan. 2014. <i>Journal of Psychiatric Research</i> , 49(1): 1-9. | No PTSD incidence | 15 |
| 30. Rona RJ, Jones M, Sundin J, Goodwin L, Hull L, Wessely S, Fear NT. Predicting persistent posttraumatic stress disorder (PTSD) in UK military personnel who served in Iraq: a longitudinal study. 2012. <i>Journal of Psychiatric Research</i> , 46(9): 1191-1198.                                                                                                     | No PTSD incidence | 16 |
| 31. Ryan-Gonzalez C, Kimbrel N, Meyer EC, Gordon EM, DeBeer BB, Gulliver SB, Elliott TR, Mosissette S. Differences in PTSD symptoms among post-9/11 veterans with blast- and non-blast mild TBI. 2019. <i>Journal of Neurotrauma</i> , 0897-7151.                                                                                                                         | No PTSD incidence | 17 |
| 32. Steenkamp MM, Schlenger WE, Corry N, Henn-Haase C, Qian M, Li M, Horesh D, Karstoft KI, Williams C, Ho CL, Shalev A, Kulka R, Marmar C. Predictors of PTSD 40 years after combat: Findings from the National Vietnam Veterans longitudinal study. 2017. <i>Depression &amp; Anxiety</i> , 34(8): 711-722.                                                             | No PTSD incidence | 18 |
| 33. Wolf E, Mitchell K, Koenen K, Miller M. Combat exposure severity as a moderator of genetic and environmental liability to post-traumatic stress disorder. 2014. <i>Psychological Medicine</i> , 44(7): 1499-1509.                                                                                                                                                     | No PTSD incidence | 19 |
| 34. Yuan C, Wang Z, Inslicht SS, McCaslin SE, Metzler TJ, Henn-Haase C, Apfel BA, Tong H, Neylan TC, Fang Y, Marmar CR. Protective factors for posttraumatic stress disorder symptoms in a prospective study of police officers. 2011. <i>Psychiatry Research</i> , 188(1): 45-50.                                                                                        | No PTSD incidence | 20 |

|                                                                                                                                                                                                                                                                                                                                                |                     |   |
|------------------------------------------------------------------------------------------------------------------------------------------------------------------------------------------------------------------------------------------------------------------------------------------------------------------------------------------------|---------------------|---|
| 35. Amster ED, Fertig SS, Green M, Carel R. Occupational exposures and psychological symptoms among fire fighters and police during a major wildfire: The carmel cohort study. 2018. <i>Occupational and Environmental Medicine</i> , 75: A590-A591                                                                                            | Not about PTSD      | 1 |
| 36. Cavanaugh CE, Campbell JC, Messing JT. A longitudinal study of the impact of cumulative violence victimization on comorbid posttraumatic stress and depression among female nurses and nursing personnel. 2014. <i>Workplace Health and Safety</i> , 62(6): 224-232.                                                                       | Not about PTSD      | 2 |
| 37. Han M, Park S, Park JH, Hwang SS, Kim I. Do police officers and firefighters have a higher risk of disease than other public officers? A 13-year nationwide cohort study in South Korea. 2018. <i>BMJ Open</i> ; 8(1):e019987.                                                                                                             | Not about PTSD      | 3 |
| 38. Jacobson IG, Horton JL, Leardmann CA, Ryan MA, Boyko EJ, Wells TS, Smith B, Smith TC. Posttraumatic stress disorder and depression among U.S. military health care professionals deployed in support of operations in Iraq and Afghanistan. 2012, <i>J Trauma Stress</i> ;25(6):616-23.                                                    | Not about PTSD      | 4 |
| 39. Tvaryanas AP, Maupin GM. Risk of incident mental health conditions among critical care air transport team members. 2014. <i>Aviation Space &amp; Environmental Medicine</i> , 85(1): 30-38.                                                                                                                                                | Not about PTSD      | 5 |
| 40. Vasterling JJ, Brailey K, Proctor SP, Kane RL, Heeren T, Franz, Molly R. Neuropsychological outcomes of mild traumatic brain injury, post-traumatic stress disorder and depression in Iraq-deployed US Army soldiers. 2012. <i>British Journal of Psychiatry</i> , 201(3): 186-192.                                                        | Not about PTSD      | 6 |
| 41. Bandelow BB, Koch M, Zimmermann P, Biesold KH, Wedekind D, Falkai P. Posttraumatic stress disorder (PTSD) in the German Armed Forces: a retrospective study in inpatients of a German army hospital. 2012. <i>European Archives of Psychiatry &amp; Clinical Neuroscience</i> , 262(6): 459-467.                                           | No control group    | 1 |
| 42. Aslan M, Concato J, Peduzzi PN, Proctor SP, Schnurr PP, Marx BP, McFall ME, Gleason TC, Huang GD, Vasterling JJ. Design of 'Neuropsychological and mental health outcomes of Operation Iraqi Freedom: a longitudinal cohort study'. 2013. <i>Journal of Investigative Medicine</i> , 61(3):569-577.                                        | Protocol paper only | 1 |
| 43. Dinenberg RE, McCaslin SE, Bates MN, Cohen BE. Social support may protect against development of posttraumatic stress disorder: findings from the Heart and Soul Study. 2014. <i>American Journal of Health Promotion</i> , 28(5): 294-297.                                                                                                | Not work-related    | 1 |
| 44. Erbes CR, Polusny MA, Arbisi PA, Koffel E. PTSD symptoms in a cohort of National Guard soldiers deployed to Iraq: Evidence for nonspecific and specific components. 2012. <i>Journal of Affective Disorders</i> , 142(1): 269-274.                                                                                                         | Not work-related    | 2 |
| 45. Eskridge SL, Macera CA, Galarneau MR, Holbrook TL, Woodruff SI, MacGregor AJ, Morton DJ, Shaffer RA. Influence of combat blast-related mild traumatic brain injury acute symptoms on mental health and service discharge outcomes. 2013. <i>Journal of Neurotrauma</i> , 30(16): 1391-1397.                                                | Not work-related    | 3 |
| 46. Eskridge SL, Macera CA, Galarneau MR, Holbrook, TL, Woodruff SI, Macgregor AJ, Morton DJ, Shaffer RA. Combat blast injuries: Injury severity and posttraumatic stress disorder interaction on career outcomes in male servicemembers. 2013. <i>Journal of Rehabilitation Research and Development</i> , 50(1): 7-16.                       | Not work-related    | 4 |
| 47. Fink DS, Gradus JL, Keyes KM, Calabrese JR, Liberzon I, Tamburrino MB, Cohen GH, Sampson L, Galea S. Subthreshold PTSD and PTSD in a prospective-longitudinal cohort of military personnel: Potential targets for preventive interventions. 2018. <i>Depression &amp; Anxiety</i> , 35(11): 1048-1055.                                     | Not work-related    | 5 |
| 48. Fitch TJ, Yu X, Chien LC, Karim MM, Alamgir H. Traumatic life events and development of post-traumatic stress disorder among female factory workers in a developing country. 2018. <i>International Journal of Social Psychiatry</i> , 64(4): 351-358.                                                                                     | Not work-related    | 6 |
| 49. Gilbertson MW, McFarlane AC, Weathers FW, Keane TM, Yehuda R, Shalev AY, Lasko NB, Goetz JM, Pitman RK, Harvard VA. Is trauma a causal agent of psychopathologic symptoms in posttraumatic stress disorder? Findings from identical twins discordant for combat exposure. 2010. <i>Journal of Clinical Psychiatry</i> , 71(10): 1324-1330. | Not work-related    | 7 |
| 50. Horesh D, Solomon Z, Keinan G, Ein-Dor T. The clinical picture of late-onset PTSD: a 20-year longitudinal study of Israeli war veterans. 2013. <i>Psychiatry Research</i> , 208(3): 265-273.                                                                                                                                               | Not work-related    | 8 |

|                                                                                                                                                                                                                                                                                                                                                                                                                                                                                     |                          |   |
|-------------------------------------------------------------------------------------------------------------------------------------------------------------------------------------------------------------------------------------------------------------------------------------------------------------------------------------------------------------------------------------------------------------------------------------------------------------------------------------|--------------------------|---|
| 51. Goldmann E, Calabrese JR, Prescott MR, Tamburrino M, Liberzon I, Slembariski R, Shirley E, Fine T, Goto T, Wilson K, Ganocy S, Chan P, Serrano MB, Sizemore J, Galea S. Potentially modifiable pre-, peri-, and postdeployment characteristics associated with deployment-related posttraumatic stress disorder among ohio army national guard soldiers. <i>Ann Epidemiol.</i> 2012;22(2): 71-78.                                                                               | No work-related exposure | 1 |
| 52. Banducci AN, McCaughey VK, Gradus JL, Street AE. The associations between deployment experiences, PTSD, and alcohol use among male and female veterans. 2019. <i>Addictive Behaviors</i> , 98: 106032,                                                                                                                                                                                                                                                                          | Cross-sectional          | 1 |
| 53. Huang, J. and Liu, Q. and Li, J. and Li, X. and You, J. and Zhang, L. and Tian, C. and Luan, R. Post-traumatic stress disorder status in a rescue group after the Wenchuan earthquake relief. 2013. <i>Neural Regeneration Research</i> , 8(20): 1898-1906.                                                                                                                                                                                                                     | Cross-sectional          | 2 |
| 54. Jones M, Sundin J, Goodwin G, Hull L, Fear NT, Wessely S, Rona RJ. 2013. What Explains Post-Traumatic Stress Disorder (PTSD) in UK Service Personnel: Deployment or Something Else? <i>Psychological Medicine</i> , 43(8):1703-12.                                                                                                                                                                                                                                              | Cross-sectional          | 3 |
| 55. Rybojad B, Aftyka A, Baran M, Rzonca P. Risk Factors for Posttraumatic Stress Disorder in Polish Paramedics: A Pilot Study. 2016. <i>Journal of Emergency Medicine</i> , 50(2): 270-276.                                                                                                                                                                                                                                                                                        | Cross-sectional          | 4 |
| 56. Liu B, Tarigan LH, Bromet EJ, Kim H. World Trade Center disaster exposure-related probable posttraumatic stress disorder among responders and civilians: a meta-analysis. 2014. <i>PLoS ONE</i> , 9(7): e101491.                                                                                                                                                                                                                                                                | Systematic review        | 1 |
| 57. Schutte N, Bar O, Weiss U, Heuft G. Prediction of PTSD in police officers after six months—a prospective study. 2012. <i>Spanish Journal of Psychology</i> , 15(3): 1339-1348.                                                                                                                                                                                                                                                                                                  | Systematic review        | 2 |
| 58. Milosavljevic M, Drakulic B, Crnobaric C, Perunicic I, Tosevski DL. Risk factor assessment for posttraumatic stress disorder in war veterans in former Yugoslavia. 2011. <i>Psihijatrija Danas</i> , 43(2): 141-153.                                                                                                                                                                                                                                                            | Not in English           | 1 |
| 59. Giupponi G, Thoma H, Lamis D, Forte A, Pompili M, Kapfhammer HP. Posttraumatic stress reactions of underground drivers after suicides by jumping to arriving trains; feasibility of an early stepped care outpatient intervention. <i>J Trauma Dissociation.</i> 2019; 20(5):495-510.                                                                                                                                                                                           | No effect sizes          | 1 |
| 60. Osofsky HJ, Osofsky JD, Arey J, Kronenberg ME, Hansel TC, Many MM. Hurricane Katrina's first responders: the struggle to protect and serve in the aftermath of the disaster. 2011. <i>Disaster Medicine and Public Health Preparedness</i> , 5: S214-S219.                                                                                                                                                                                                                      | No effect sizes          | 2 |
| 61. Rosenblatt AS, Li R, Fortier C, Liu X, Fonda JR, Villalon A, McGlinchey RE, Jorge RE. Latent factor structure of PTSD symptoms in veterans with a history of mild traumatic brain injury and close-range blast exposure. 2018. <i>Psychological Trauma: Theory, Research, Practice, and Policy</i> , 442-450.                                                                                                                                                                   | No effect sizes          | 3 |
| 62. Sheffler JL, Rushing NC, Stanley IH, Sachs-Ericsson NJ. The long-term impact of combat exposure on health, interpersonal, and economic domains of functioning. 2016. <i>Aging and Mental Health</i> , 20(11): 1202-1212.                                                                                                                                                                                                                                                        | No effect sizes          | 4 |
| 63. Solberg O, Birkeland MS, Blix I, Hansen MB, Heir T. Towards an exposure-dependent model of post-traumatic stress: longitudinal course of post-traumatic stress symptomatology and functional impairment after the 2011 Oslo bombing. 2016. <i>Psychological Medicine</i> , 46(15): 3241-3254.                                                                                                                                                                                   | No effect sizes          | 5 |
| 64. Taymur I, Sargin AE, Ozdel K, Turkcapar HM, Caliskan L, Zamki E, Demirel B. Possible Risk Factors for Acute Stress Disorder and Post-Traumatic Stress Disorder After an Industrial Explosion. 2014. <i>Noropsikiyatri Arsivi</i> , 51(1): 23-29.                                                                                                                                                                                                                                | No effect sizes          | 6 |
| 65. Wisnivesky JP, Teitelbaum S, Todd AC, Boffetta P, Crane M, Crowley L, De la Hoz RE, Dellenbaugh C, Harrison DJ, Herbert R, Kim H, Jeon Y, Kaplan J, Katz CL, Levin SM, Luft BJ, Markowitz S, Moline JM, Ozbay F, Pietrzak RH, Shapiro M, Sharma V, Skloot G, Southwick SM, Stevenson LA, Udasin IG, Wallenstein S, Landrigan PJ. Persistence of multiple illnesses in World Trade Center rescue and recovery workers: a cohort study. 2011. <i>Lancet</i> , 378(9794): 888-897. | No effect sizes          | 7 |
