# Supplementary material for: What work-related exposures are associated with post-traumatic stress disorder? A systematic review with meta-analysis
Source: PubMed Central journal article supplement — BMJ Open. 2021 Aug 25;11(8):e049651. doi: 10.1136/bmjopen-2021-049651 (PMC8388294; doi:10.1136/bmjopen-2021-049651), 2021-08-25
Supplement: bmjopen-2021-049651supp003.pdf [file bmjopen-2021-049651supp003.pdf]

Supplementary file 3. Data extraction of included studies.

| First author, Year;                                            | Study (name, design and follow-up period)                                                                                                | Sample description (n, Country, Type of job/company, relevant inclusion/exclusion criteria, %Female, Age)                                                                                                                                                                                        | Description of exposure assessment (way and year of baseline exposure assessment and description of categories)                                                                                                                                                                                          | Description of outcome (type of symptoms, way of assessment, and incidence over the follow-up period)                                                                    | Adjustment                                                                                                                                                                     | Effect estimates (e.g., HR, RR or OR with 95% confidence interval). Super scripts refer to the models specified in the 'adjustment' column                                                                                                                                                                                                                   |
|----------------------------------------------------------------|------------------------------------------------------------------------------------------------------------------------------------------|--------------------------------------------------------------------------------------------------------------------------------------------------------------------------------------------------------------------------------------------------------------------------------------------------|----------------------------------------------------------------------------------------------------------------------------------------------------------------------------------------------------------------------------------------------------------------------------------------------------------|--------------------------------------------------------------------------------------------------------------------------------------------------------------------------|--------------------------------------------------------------------------------------------------------------------------------------------------------------------------------|--------------------------------------------------------------------------------------------------------------------------------------------------------------------------------------------------------------------------------------------------------------------------------------------------------------------------------------------------------------|
| 1. Armed Forces Health Surveillance Center, 2011 <sup>21</sup> | <p>Name: Armed forces health surveillance</p> <p>Design: Prospective longitudinal</p> <p>Follow-up period: 12 months post deployment</p> | <p>n=1,344,668</p> <p>Country=USA</p> <p>%Female= 11%</p> <p>Age= The majority was &lt;25, with lower numbers of participants in the 25-29 and 30+ categories.</p> <p>Type of job/company= Active components of the forces (on Afghanistan and Iran missions).</p> <p>Inclusion/exclusion= -</p> | <p>Exposure assessment: Self-reported</p> <p>Year of assessment: between Oct 2001 and Dec 2010</p> <p>Exposure categories: % PTSD diagnosis were compared between deployment number, gender, age group, military occupation (combat, health care and other) and 'dwelling time' between employments.</p> | <p>Type of symptoms: PTSD</p> <p>Way of assessment: Mental disorders assessed with ICD-9-CM (309.81), reported in military or civilian hospitals</p> <p>Incidence: -</p> | No                                                                                                                                                                             | <p>PTSD incidence was in general higher after the second, third and fourth deployment, compared to the first and fifth.</p> <p>PTSD incidence was in general higher among males, those in lowest age group, health care workers and those with longer dwelling time between the deployments.</p> <p>No effect estimates were reported (only incidences).</p> |
| 2. Andersen, 2019 <sup>19</sup>                                | <p>Name: -</p> <p>Design: Prospective longitudinal (with cross-sectional and longitudinal analyses)</p> <p>Follow-up period: 4 years</p> | <p>n= 2,678</p> <p>Country= Denmark</p> <p>%Female= 66%</p> <p>Age= 45.1(10.1) years</p> <p>Type of job/company= Employees working in psychiatric wards, in the</p>                                                                                                                              | <p>Exposure assessment: Self-reported</p> <p>Year of assessment: 2011</p> <p>Exposure categories: Work-related violence and threats on a 5 point likert scale with 0=never to 4=almost daily, with</p>                                                                                                   | <p>Type of symptoms: PTSD</p> <p>Way of assessment: Self-reported with the Impact of Event Scale-Revised</p> <p>Incidence: 14% (2 incidences)</p>                        | Unadjusted (model 1), adjusted for gender, age, bullying, sexual harassment, conflicts at work, negative acts, private traumas and sector (model 2), additionally adjusted for | <p><b>Work-related threats</b></p> <p>All four sectors</p> <p>PTSD at 2011</p> <p>OR: 1.11 [1.07 1.14]<sup>1</sup></p> <p>OR: 1.10 [1.05 1.15]<sup>2</sup></p> <p>PTSD at 2015</p> <p>OR: 1.10 [1.07 1.13]<sup>1</sup></p> <p>OR: 1.11 [1.07 1.15]<sup>2</sup></p> <p>OR: 1.10 [1.04 1.15]<sup>3</sup></p> <p>Elder care</p>                                 |

|  |  |                                                                                                                |                                             |  |                         |                                                                                                                                                                                                                                                                                                                                                                                                                                                                                                                                                                                                                                                                                                                                                                                                                                                                                                                                                                                                                                       |
|--|--|----------------------------------------------------------------------------------------------------------------|---------------------------------------------|--|-------------------------|---------------------------------------------------------------------------------------------------------------------------------------------------------------------------------------------------------------------------------------------------------------------------------------------------------------------------------------------------------------------------------------------------------------------------------------------------------------------------------------------------------------------------------------------------------------------------------------------------------------------------------------------------------------------------------------------------------------------------------------------------------------------------------------------------------------------------------------------------------------------------------------------------------------------------------------------------------------------------------------------------------------------------------------|
|  |  | elder sector, at special schools and in the prison and probation service.<br><br><u>Inclusion/exclusion</u> -- | summary scores 0-24 and 0-44, respectively. |  | baseline PTSD (model 3) | <p>PTSD at 2011<br/>OR: 0.99 [0.88 1.23]<sup>1</sup><br/>OR: 0.98 [0.82 1.18]<sup>2</sup></p> <p>PTSD at 2015<br/>OR: 1.12 [1.00 1.25]<sup>1</sup><br/>OR: 1.12 [0.94 1.33]<sup>2</sup><br/>OR: 1.22 [0.95 1.56]<sup>3</sup></p> <p>Prison and probation service<br/>PTSD at 2011<br/>OR: 1.21 [1.14 1.28]<sup>1</sup><br/>OR: 1.18 [1.08 1.27]<sup>2</sup></p> <p>PTSD at 2015<br/>OR: 1.73 [1.20 1.35]<sup>1</sup><br/>OR: 1.25 [1.17 1.34]<sup>2</sup><br/>OR: 1.22 [1.13 1.31]<sup>3</sup></p> <p>Psychiatry<br/>PTSD at 2011<br/>OR: 1.14 [1.06 1.12]<sup>1</sup><br/>OR: 1.19 [1.09 1.32]<sup>2</sup></p> <p>PTSD at 2015<br/>OR: 1.06 [0.99 1.13]<sup>1</sup><br/>OR: 1.06 [0.97 1.17]<sup>2</sup><br/>OR: 0.94 [0.83 1.07]<sup>3</sup></p> <p>Special schools<br/>PTSD at 2011<br/>OR: 1.01 [0.93 1.09]<sup>1</sup><br/>OR: 0.95 [0.85 1.05]<sup>2</sup></p> <p>PTSD at 2015<br/>OR: 1.08 [1.01 1.15]<sup>1</sup><br/>OR: 1.06 [0.98 1.14]<sup>2</sup><br/>OR: 1.07 [0.95 1.12]<sup>3</sup></p> <p>PTSD at 2011<br/>Males</p> |
|--|--|----------------------------------------------------------------------------------------------------------------|---------------------------------------------|--|-------------------------|---------------------------------------------------------------------------------------------------------------------------------------------------------------------------------------------------------------------------------------------------------------------------------------------------------------------------------------------------------------------------------------------------------------------------------------------------------------------------------------------------------------------------------------------------------------------------------------------------------------------------------------------------------------------------------------------------------------------------------------------------------------------------------------------------------------------------------------------------------------------------------------------------------------------------------------------------------------------------------------------------------------------------------------|

|  |  |  |  |  |  |                                                                                                                                                                                                                                                                                                                                                                                                                                                                                                                                                                                                                                                                                                                                                                                                                                                                                                                                                                                                                                        |
|--|--|--|--|--|--|----------------------------------------------------------------------------------------------------------------------------------------------------------------------------------------------------------------------------------------------------------------------------------------------------------------------------------------------------------------------------------------------------------------------------------------------------------------------------------------------------------------------------------------------------------------------------------------------------------------------------------------------------------------------------------------------------------------------------------------------------------------------------------------------------------------------------------------------------------------------------------------------------------------------------------------------------------------------------------------------------------------------------------------|
|  |  |  |  |  |  | <p>OR: 1.19 [1.12 1.26]<sup>2</sup><br/> Females<br/> OR: 1.04 [0.99 1.09]<sup>2</sup><br/> PTSD at 2015<br/> Males<br/> OR: 1.18 [1.09 1.26]<sup>3</sup><br/> Females<br/> OR: 1.02 [0.96 1.09]<sup>3</sup></p> <p><b>Work-related violence</b><br/> All four sectors<br/> PTSD at 2011<br/> OR: 1.05 [1.03 1.08]<sup>1</sup><br/> OR: 1.05 [1.01 1.08]<sup>2</sup><br/> PTSD at 2015<br/> OR: 1.02 [0.98 1.04]<sup>1</sup><br/> OR: 1.03 [1.00 1.06]<sup>2</sup><br/> OR: 1.02 [0.98 1.06]<sup>3</sup></p> <p>Elder care<br/> PTSD at 2011<br/> OR: 1.04 [0.95 1.12]<sup>1</sup><br/> OR: 1.03 [0.94 1.13]<sup>2</sup><br/> PTSD at 2015<br/> OR: 1.07 [0.97 1.15]<sup>1</sup><br/> OR: 1.03 [0.93 1.14]<sup>2</sup><br/> OR: 1.02 [0.90 1.16]<sup>3</sup></p> <p>Prison and probation service<br/> PTSD at 2011<br/> OR: 1.29 [1.15 1.49]<sup>1</sup><br/> OR: 1.26 [1.09 1.46]<sup>2</sup><br/> PTSD at 2015<br/> OR: 1.50 [1.31 1.73]<sup>1</sup><br/> OR: 1.42 [1.22 1.65]<sup>2</sup><br/> OR: 1.36 [1.36 1.60]<sup>3</sup></p> |
|--|--|--|--|--|--|----------------------------------------------------------------------------------------------------------------------------------------------------------------------------------------------------------------------------------------------------------------------------------------------------------------------------------------------------------------------------------------------------------------------------------------------------------------------------------------------------------------------------------------------------------------------------------------------------------------------------------------------------------------------------------------------------------------------------------------------------------------------------------------------------------------------------------------------------------------------------------------------------------------------------------------------------------------------------------------------------------------------------------------|

|                                 |                                                                                                                             |                                                                                                                                             |                                                                                                                                                         |                                                                                                                                                                 |                                                                                                     |                                                                                                                                                                                                                                                                                                                                                                                                                                                                                                                                                                                                                                                                                                                     |
|---------------------------------|-----------------------------------------------------------------------------------------------------------------------------|---------------------------------------------------------------------------------------------------------------------------------------------|---------------------------------------------------------------------------------------------------------------------------------------------------------|-----------------------------------------------------------------------------------------------------------------------------------------------------------------|-----------------------------------------------------------------------------------------------------|---------------------------------------------------------------------------------------------------------------------------------------------------------------------------------------------------------------------------------------------------------------------------------------------------------------------------------------------------------------------------------------------------------------------------------------------------------------------------------------------------------------------------------------------------------------------------------------------------------------------------------------------------------------------------------------------------------------------|
|                                 |                                                                                                                             |                                                                                                                                             |                                                                                                                                                         |                                                                                                                                                                 |                                                                                                     | Psychiatry<br>PTSD at 2011<br>OR: 1.08 [1.01 1.15] <sup>1</sup><br>OR: 1.13 [1.03 1.24] <sup>2</sup><br>PTSD at 2015<br>OR: 1.04 [0.98 1.10] <sup>1</sup><br>OR: 1.05 [0.96 1.14] <sup>2</sup><br>OR: 0.98 [0.88 1.10] <sup>3</sup><br><br>Special schools<br>PTSD at 2011<br>OR: 1.04 [0.98 1.09] <sup>1</sup><br>OR: 1.03 [0.97 1.10] <sup>2</sup><br>PTSD at 2015<br>OR: 1.02 [0.97 1.07] <sup>1</sup><br>OR: 1.02 [0.97 1.07] <sup>2</sup><br>OR: 1.01 [0.42 1.08] <sup>3</sup><br><br>PTSD at 2011<br>Males<br>OR: 1.06 [0.99 1.12] <sup>2</sup><br>Females<br>OR: 1.03 [0.99 1.07] <sup>2</sup><br>PTSD at 2015<br>Males<br>OR: 1.07 [0.99 1.14] <sup>3</sup><br>Females<br>OR: 0.99 [0.95 1.05] <sup>3</sup> |
| 3. Anderson, 2019 <sup>20</sup> | <u>Name:</u> Army STARRS study<br><br><u>Design:</u> Prospective longitudinal (with baseline measurements 1-2 months before | <u>n</u> =4,645<br><br><u>Country</u> =USA<br><br><u>%Female</u> =5%<br><br><u>Age</u> =26.9(0.2) years<br><br><u>Type of job/company</u> = | <u>Exposure assessment:</u> Self-reported<br><br><u>Year of assessment:</u> 2012<br><br><u>Exposure categories:</u> Unit cohesion, stressful employment | <u>Type of symptoms:</u> PTSD (30 days)<br><br><u>Way of assessment:</u> Composite International Diagnostic Interview screening scales (CIDI-SC) and a six-item | Models were adjusted for all other exposures (model 1) and for lifetime PTSD at baseline (model 2). | <u>Age</u><br>OR: 1.00 [0.99 1.02] <sup>1</sup><br>OR: 1.00 [0.99 1.02] <sup>2</sup><br><br><u>Sex</u><br><u>Female</u><br>OR: Ref<br>OR: Ref<br><u>Male</u>                                                                                                                                                                                                                                                                                                                                                                                                                                                                                                                                                        |

|  |                                                                         |                                                                                           |                                                    |                                                                                                                                   |  |                                                                                                                                                                                                                                                                                                                                                                                                                                                                                                                                                                                                                                                                                                                                                                                                                                                                                       |
|--|-------------------------------------------------------------------------|-------------------------------------------------------------------------------------------|----------------------------------------------------|-----------------------------------------------------------------------------------------------------------------------------------|--|---------------------------------------------------------------------------------------------------------------------------------------------------------------------------------------------------------------------------------------------------------------------------------------------------------------------------------------------------------------------------------------------------------------------------------------------------------------------------------------------------------------------------------------------------------------------------------------------------------------------------------------------------------------------------------------------------------------------------------------------------------------------------------------------------------------------------------------------------------------------------------------|
|  | the deployment)<br><u>Follow-up period:</u><br>9 months post-employment | Soldiers from three combat teams employed in Afghanistan<br><u>Inclusion/exclusion=</u> - | characteristics and sociodemographic were assessed | screening version of the PTSD Checklist (PCL) to assess lifetime DSM-4 mental disorders<br><br><u>Incidence:</u> 11.9% (lifetime) |  | OR: 0.73 [0.46 1.14] <sup>1</sup><br>OR: 0.88 [0.51 1.51] <sup>2</sup><br><br><b>Race</b><br><u>White</u><br>OR: Ref<br>OR: Ref<br><u>Black</u><br>OR: 0.99 [0.67 1.48] <sup>1</sup><br>OR: 1.04 [0.72 1.49] <sup>2</sup><br><u>Asian</u><br>OR: 1.28 [0.77 2.12] <sup>1</sup><br>OR: 1.38 [0.80 2.39] <sup>2</sup><br><u>Other</u><br>OR: 1.49 [1.04 2.15] <sup>1</sup><br>OR: 1.25 [0.86 1.82] <sup>2</sup><br><br><b>Ethnicity</b><br><u>Non-Hispanic</u><br>OR: Ref<br>OR: Ref<br><u>Hispanic</u><br>OR: 1.15 [0.83 1.59] <sup>1</sup><br>OR: 1.22 [0.87 1.73] <sup>2</sup><br><br><b>Brigade Combat Team</b><br><u>Fort #1</u><br>OR: Ref<br>OR: Ref<br><u>Fort #2</u><br>OR: 1.15 [0.90 1.47] <sup>1</sup><br>OR: 1.31 [0.97 1.77] <sup>2</sup><br><u>Fort #3</u><br>OR: 1.00 [0.80 1.24] <sup>1</sup><br>OR: 1.09 [0.82 1.45] <sup>2</sup><br><br><b>Number of deployments</b> |
|--|-------------------------------------------------------------------------|-------------------------------------------------------------------------------------------|----------------------------------------------------|-----------------------------------------------------------------------------------------------------------------------------------|--|---------------------------------------------------------------------------------------------------------------------------------------------------------------------------------------------------------------------------------------------------------------------------------------------------------------------------------------------------------------------------------------------------------------------------------------------------------------------------------------------------------------------------------------------------------------------------------------------------------------------------------------------------------------------------------------------------------------------------------------------------------------------------------------------------------------------------------------------------------------------------------------|

|  |  |  |  |  |  |                                                                                                                                                                                                                                                                                                                                                                                                                                                                                                                                                                                                                                                                                                                                                                                                                                                                                                                                             |
|--|--|--|--|--|--|---------------------------------------------------------------------------------------------------------------------------------------------------------------------------------------------------------------------------------------------------------------------------------------------------------------------------------------------------------------------------------------------------------------------------------------------------------------------------------------------------------------------------------------------------------------------------------------------------------------------------------------------------------------------------------------------------------------------------------------------------------------------------------------------------------------------------------------------------------------------------------------------------------------------------------------------|
|  |  |  |  |  |  | <p><u>Zero</u><br/>OR: Ref<br/>OR: Ref</p> <p><u>One</u><br/>OR: 1.09 [0.84 1.42]<sup>1</sup><br/>OR: 0.96 [0.73 1.27]<sup>2</sup></p> <p><u>≥Two</u><br/>OR: 1.12 [0.87 1.43]<sup>1</sup><br/>OR: 0.92 [0.71 1.19]<sup>2</sup></p> <p><b>Time in unit</b></p> <p><u>&gt;6months</u><br/>OR: Ref<br/>OR: Ref</p> <p><u>&lt;1month</u><br/>OR: 1.51 [1.12 2.05]<sup>1</sup><br/>OR: 1.81 [1.24 2.63]<sup>2</sup></p> <p><u>1–6 months</u><br/>OR: 0.75 [0.58 0.96]<sup>1</sup><br/>OR: 0.77 [0.64 0.94]<sup>2</sup></p> <p><b>Lifetime PTSD at baseline</b><br/>OR: 3.06 [2.24 4.17]<sup>1</sup></p> <p><b>30-day PTSD at baseline</b><br/>OR: 2.28 [1.36 3.82]<sup>1</sup></p> <p><b>Deployment stress</b></p> <p><u>Low/moderate</u><br/>OR: Ref<br/>OR: Ref</p> <p><u>High</u><br/>OR: 3.21 [2.75 3.74]<sup>1</sup><br/>OR: 3.52 [2.94 4.21]<sup>2</sup></p> <p><b>Unit cohesion at baseline</b><br/>OR: 0.82 [0.73 0.91]<sup>1</sup></p> |
|--|--|--|--|--|--|---------------------------------------------------------------------------------------------------------------------------------------------------------------------------------------------------------------------------------------------------------------------------------------------------------------------------------------------------------------------------------------------------------------------------------------------------------------------------------------------------------------------------------------------------------------------------------------------------------------------------------------------------------------------------------------------------------------------------------------------------------------------------------------------------------------------------------------------------------------------------------------------------------------------------------------------|

|                                  |                                                                                                                                                                                        |                                                                                                                                                                                                                                                                                                                                                                                               |                                                                                                                                                                                                             |                                                                                                                                                       |                                                                                                                                                              |                                                                                                                                                                                                                                                                                                                                                                                                                                                                                                                                                                                                                                                                                                                                                                                                                                                                                                                     |
|----------------------------------|----------------------------------------------------------------------------------------------------------------------------------------------------------------------------------------|-----------------------------------------------------------------------------------------------------------------------------------------------------------------------------------------------------------------------------------------------------------------------------------------------------------------------------------------------------------------------------------------------|-------------------------------------------------------------------------------------------------------------------------------------------------------------------------------------------------------------|-------------------------------------------------------------------------------------------------------------------------------------------------------|--------------------------------------------------------------------------------------------------------------------------------------------------------------|---------------------------------------------------------------------------------------------------------------------------------------------------------------------------------------------------------------------------------------------------------------------------------------------------------------------------------------------------------------------------------------------------------------------------------------------------------------------------------------------------------------------------------------------------------------------------------------------------------------------------------------------------------------------------------------------------------------------------------------------------------------------------------------------------------------------------------------------------------------------------------------------------------------------|
|                                  |                                                                                                                                                                                        |                                                                                                                                                                                                                                                                                                                                                                                               |                                                                                                                                                                                                             |                                                                                                                                                       |                                                                                                                                                              | OR: 0.74 [0.65 0.84] <sup>2</sup>                                                                                                                                                                                                                                                                                                                                                                                                                                                                                                                                                                                                                                                                                                                                                                                                                                                                                   |
| 4. Berninger, 2010 <sup>22</sup> | <p><b>Name:</b> FDNY-WTC-MMP</p> <p><b>Design:</b> Prospective longitudinal with baseline measurement within 6 months from the disaster.</p> <p><b>Follow-up period:</b> 2.9 years</p> | <p><u>n</u>=5,656</p> <p><u>Country</u>= USA</p> <p><u>%Female</u>= 0%</p> <p><u>Age</u>= -</p> <p><u>Type of job/company</u>= New York fire department rescue workers who were involved in the 9/11 WTC disaster</p> <p><u>Inclusion/exclusion</u>= Fire fighters who retired during the study, who arrived at the disaster site &gt;14 days after the rescue, and females; firefighters</p> | <p><u>Exposure assessment:</u> Demographic and retirement from employee databases, all other information from self-reports.</p> <p><u>Year of assessment:</u> 2001</p> <p><u>Exposure categories:</u> -</p> | <p><u>Type of symptoms:</u> Probable PTSD</p> <p><u>Way of assessment:</u> Self-reported using PTSD checklist (PCL-m)</p> <p><u>Incidence:</u>16%</p> | <p>Univariate (model 1) and multivariate adjusting for all other exposures that contributed statistically significant in the univariate model (model 2).</p> | <p><b>Age</b></p> <p><u>20-29 years</u><br/>OR: Ref</p> <p><u>30-39 years</u><br/>OR: 1.0 [0.8 1.3]<sup>1</sup></p> <p><u>40-49 years</u><br/>OR: 1.0 [0.8 1.3]<sup>1</sup></p> <p><u>50-59 years</u><br/>OR: 0.6 [0.4 1.1]<sup>1</sup></p> <p><u>60+ years</u><br/>OR: -</p> <p><u>Continuous</u><br/>OR: 0.98 [0.97 1.00]<sup>2</sup></p> <p><b>Education</b></p> <p><u>High School</u><br/>OR: Ref</p> <p><u>Some College</u><br/>OR: 1.1 [0.9 1.3]<sup>1</sup></p> <p><u>College</u><br/>OR: 1.1 [0.9 1.3]<sup>1</sup></p> <p><u>Post-College</u><br/>OR: 1.2 [0.8 1.8]<sup>1</sup></p> <p><b>Living with a partner</b></p> <p><u>Yes</u><br/>OR: Ref</p> <p><u>No</u><br/>OR: 1.06 [0.89 1.27]<sup>1</sup></p> <p><b>Arrival Group</b></p> <p><u>Morning of 9/11</u><br/>OR: 4.8 [3.0 7.5]<sup>1</sup><br/>OR: 2.0 [1.3 2.9]<sup>2</sup></p> <p><u>Afternoon of 9/11</u><br/>OR: 2.3 [1.5 3.5]<sup>1</sup></p> |

|  |  |  |  |  |  |                                                                                                                                                                                                                                                                                                                                                                                                                                                                                                                                                                                                                                                                                                                                                                                                                               |
|--|--|--|--|--|--|-------------------------------------------------------------------------------------------------------------------------------------------------------------------------------------------------------------------------------------------------------------------------------------------------------------------------------------------------------------------------------------------------------------------------------------------------------------------------------------------------------------------------------------------------------------------------------------------------------------------------------------------------------------------------------------------------------------------------------------------------------------------------------------------------------------------------------|
|  |  |  |  |  |  | <p>OR: 1.1 [0.8 1.5]<sup>2</sup><br/> <u>Day 2</u><br/> OR: 1.4 [0.8 2.3]<sup>1</sup><br/> <u>Days 3-14</u><br/> OR: Ref</p> <p><b>Prolonged work at the WTC site</b><br/> <u>≥4 months</u><br/> OR: 2.0 [1.7 2.3]<sup>1</sup><br/> <u>&lt;4 months</u><br/> OR: Ref</p> <p><b>Rank</b><br/> <u>Firefighter</u><br/> OR: Ref<br/> <u>Line officer</u><br/> OR: 1.1 [0.95 1.30]<sup>1</sup><br/> <u>Chiefs</u><br/> OR: 0.96 [0.70 1.32]<sup>1</sup></p> <p><b>Number of deaths in firehouse</b><br/> <u>0 deaths</u><br/> OR: Ref<br/> <u>1-3 deaths</u><br/> OR: 1.5 [1.2 1.9]<sup>1</sup><br/> <u>4+ deaths</u><br/> OR: 2.3 [1.8 2.9]<sup>1</sup></p> <p><b>Supervising responsibilities</b><br/> <u>Yes</u><br/> OR: 2.2 [1.7 2.9]<sup>1</sup><br/> <u>No</u><br/> OR: Ref</p> <p><b>Previous disaster experience</b></p> |
|--|--|--|--|--|--|-------------------------------------------------------------------------------------------------------------------------------------------------------------------------------------------------------------------------------------------------------------------------------------------------------------------------------------------------------------------------------------------------------------------------------------------------------------------------------------------------------------------------------------------------------------------------------------------------------------------------------------------------------------------------------------------------------------------------------------------------------------------------------------------------------------------------------|



|                                 |                                                                                                                          |                                                                                                                                                                                                                                                                                                                                                         |                                                                                                                                                                                                                            |                                                                                                                                                                                                                               |   |                                                                                                                                                                                                                                                                                                                                                                                                                                                                                                                                                                                                                          |
|---------------------------------|--------------------------------------------------------------------------------------------------------------------------|---------------------------------------------------------------------------------------------------------------------------------------------------------------------------------------------------------------------------------------------------------------------------------------------------------------------------------------------------------|----------------------------------------------------------------------------------------------------------------------------------------------------------------------------------------------------------------------------|-------------------------------------------------------------------------------------------------------------------------------------------------------------------------------------------------------------------------------|---|--------------------------------------------------------------------------------------------------------------------------------------------------------------------------------------------------------------------------------------------------------------------------------------------------------------------------------------------------------------------------------------------------------------------------------------------------------------------------------------------------------------------------------------------------------------------------------------------------------------------------|
|                                 |                                                                                                                          |                                                                                                                                                                                                                                                                                                                                                         |                                                                                                                                                                                                                            |                                                                                                                                                                                                                               |   | <p><u>Yes</u><br/>OR: 1.4 [1.2 1.6]<sup>1</sup></p> <p><u>No</u><br/>OR: Ref</p> <p><b>Duration of work at WTC site (per month)</b><br/>OR: 1.1 [1.1 1.2]<sup>2</sup></p> <p><b>Reported increase in alcohol</b><br/>OR: 1.3 [1.0 1.7]<sup>2</sup></p> <p><b>Baseline probable PTSD</b><br/>OR: 5.6 [4.4 7.0]<sup>2</sup></p>                                                                                                                                                                                                                                                                                            |
| 5. Brownlow, 2018 <sup>23</sup> | <p><u>Name:</u> Army STARSS study</p> <p><u>Design:</u> Retrospective longitudinal</p> <p><u>Follow-up period:</u> -</p> | <p>n= 14,254 for AAS and 25,629 for NSS.</p> <p><u>Country=</u> USA</p> <p><u>%Female=</u> 12% for AAS and 17% for NSS</p> <p><u>Age=</u> 29.0(0.1) for AAS and 21.0(0.0) for NSS</p> <p><u>Type of job/company=</u> Soldiers at all stages of their activity (AAS sub-study) and new recruits (NSS sub-study)</p> <p><u>Inclusion/exclusion=</u> -</p> | <p><u>Exposure assessment:</u> Self-reported</p> <p><u>Year of assessment:</u> 2011-2013</p> <p><u>Exposure categories:</u> Deployment-related and lifetime stress were assessed (the former only for the AAS cohort).</p> | <p><u>Type of symptoms:</u> Probable PTSD (lifetime and past 30-day prevalence) was assessed using the PTSD Checklist (PCL) using DSM-4 criteria</p> <p><u>Way of assessment:</u> Self-reported</p> <p><u>Incidence:-</u></p> | - | <p><b>Diversity of Deployment-Related Traumatic Stress Score [0-15]</b><br/><i>30-day PTSD</i><br/>OR: 1.15 [1.13 1.16] (AAS)<br/><i>Lifetime PTSD</i><br/>OR: 1.17 [1.16 1.18] (AAS)</p> <p><b>Cumulative Deployment-Related Traumatic Stress Score [0 60]</b><br/><i>30-day PTSD</i><br/>OR: 1.03 [1.03 1.04] (AAS)<br/><i>Lifetime PTSD</i><br/>OR: 1.00 [0.99 1.00] (AAS)</p> <p><b>Diversity of Lifetime Traumatic Stress Score</b><br/><i>30-day PTSD</i><br/>OR: 1.14 [1.13 1.16] (AAS)<br/>OR: 1.34 [1.30 1.38] (NSS)<br/><i>Lifetime PTSD</i><br/>OR: 1.16 [1.15 1.17] (AAS)<br/>OR: 1.34 [1.31 1.38] (NSS)</p> |

|                                 |                                                                                                                                                                          |                                                                                                                                                                                                                                                                                                                                                                                                                      |                                                                                                                                                                                                                                                                        |                                                                                                                                  |                                                                      | <b>Cumulative Lifetime Traumatic Stress Score</b><br><i>30-day PTSD</i><br>OR: 1.02 [1.02 1.03] (AAS)<br>OR: 0.99 [0.98 1.01] (NSS)<br><i>Lifetime PTSD</i><br>OR: 1.02 [1.01 1.02] (AAS)<br>OR: 1.00 [0.99 1.01] (NSS)                                                                                                                                                   |
|---------------------------------|--------------------------------------------------------------------------------------------------------------------------------------------------------------------------|----------------------------------------------------------------------------------------------------------------------------------------------------------------------------------------------------------------------------------------------------------------------------------------------------------------------------------------------------------------------------------------------------------------------|------------------------------------------------------------------------------------------------------------------------------------------------------------------------------------------------------------------------------------------------------------------------|----------------------------------------------------------------------------------------------------------------------------------|----------------------------------------------------------------------|---------------------------------------------------------------------------------------------------------------------------------------------------------------------------------------------------------------------------------------------------------------------------------------------------------------------------------------------------------------------------|
| 6. Brundage, 2015 <sup>24</sup> | <p><b>Name:</b> Defense Medical Surveillance System (DMSS)</p> <p><b>Design:</b> Prospective longitudinal</p> <p><b>Follow-up period:</b> 36 months post-deployment.</p> | <p>n= 2,020,340 (Iraq/Afghanistan) and 529,609 (Korea/Japan)</p> <p><b>Country=</b> USA</p> <p><b>%Female=</b> -</p> <p><b>Age=</b> -</p> <p><b>Type of job/company=</b> Individuals who served in army, air force, navy and marine. Those who were deployed in Iraq and Afghanistan were compared with a reference group who returned from assignments in Korea and Japan.</p> <p><b>Inclusion/exclusion=</b> -</p> | <p><b>Exposure assessment:</b> Deployment administration</p> <p><b>Year of assessment:</b> 2003-2014</p> <p><b>Exposure categories:</b> Iraq/Afghanistan vs Korea/Japan, and occupation. Also other factors were assessed but were not considered for this review.</p> | <p><b>Type of symptoms:</b> PTSD</p> <p><b>Way of assessment:</b> Diagnosis using ICD-9 criteria.</p> <p><b>Incidence:</b> -</p> | -                                                                    | <p>There were 4.85 diagnoses per 100 deployments among those who served in Iraq/Afghanistan, this was 1.04 among those who went to Japan/Korea (with a 4.66 ratio between the two groups).</p> <p>Diagnosis per 100 deployments were highest among combat specific (5.62) and health care (8.52) occupations who went to Iraq/Afghanistan, compared to others (4.17).</p> |
| 7. Cameron, 2019 <sup>25</sup>  | <p><b>Name:</b> Defence Manpower Data Center (DMDC) Database and Defense Medical</p>                                                                                     | <p>n= 1.35 million</p> <p><b>Country =</b> USA</p> <p><b>%Female=</b> 12%</p>                                                                                                                                                                                                                                                                                                                                        | <p><b>Exposure assessment:</b> Deployment administration</p> <p><b>Year of assessment:</b></p>                                                                                                                                                                         | <p><b>Type of symptoms:</b> PTSD</p> <p><b>Way of assessment:</b> Data from the</p>                                              | Unadjusted (model 1) and adjusted for all other exposures (model 2). | <p><b>Sex</b></p> <p><b>Female</b><br/>RR: 1.65 [1.54 1.77]<sup>1</sup></p> <p><b>Male</b><br/>RR: 1.92 [1.84 2.00]<sup>2</sup></p>                                                                                                                                                                                                                                       |

|  |                                                                                                                              |                                                                                                                                                  |                                                                                |                                                                                                                                                   |                                                                                                                                                                                                                                                                                                                                                                                                                                                                                                                                                                                                                                                                                                                                                                                                                                                                                                                                          |
|--|------------------------------------------------------------------------------------------------------------------------------|--------------------------------------------------------------------------------------------------------------------------------------------------|--------------------------------------------------------------------------------|---------------------------------------------------------------------------------------------------------------------------------------------------|------------------------------------------------------------------------------------------------------------------------------------------------------------------------------------------------------------------------------------------------------------------------------------------------------------------------------------------------------------------------------------------------------------------------------------------------------------------------------------------------------------------------------------------------------------------------------------------------------------------------------------------------------------------------------------------------------------------------------------------------------------------------------------------------------------------------------------------------------------------------------------------------------------------------------------------|
|  | <p>Surveillance System (DMSS)</p> <p><u>Design:</u><br/>Retrospective longitudinal</p> <p><u>Follow-up period:</u><br/>-</p> | <p><u>Age</u>= -</p> <p><u>Type of job/company</u> = Active duty service members between 1999 and 2008.</p> <p><u>Inclusion/exclusion</u>= -</p> | <p>1999-2008</p> <p><u>Exposure categories:</u><br/>Rank and service type.</p> | <p>Defence Medical Surveillance System (DMSS), with ICD-9-CM coded diagnoses, were used.</p> <p><u>Incidence:</u> 52,771 incident cases (~4%)</p> | <p>RR: Ref.<br/>RR: Ref.</p> <p><b>Age</b></p> <p><u>&lt; 20</u><br/>RR: Ref.<br/>RR: Ref.</p> <p><u>20–24</u><br/>RR: 1.41 [1.25 1.60]<sup>1</sup><br/>RR: 1.36 [1.27 1.46]<sup>2</sup></p> <p><u>25–29</u><br/>RR: 1.36 [1.20 1.54]<sup>1</sup><br/>RR: 1.52 [1.41 1.65]<sup>2</sup></p> <p><u>30–34</u><br/>RR: 1.00 [0.87 1.15]<sup>1</sup><br/>RR: 1.37 [1.25 1.50]<sup>2</sup></p> <p><u>35–39</u><br/>RR: 0.88 [0.76 1.02]<sup>1</sup><br/>RR: 1.37 [1.24 1.52]<sup>2</sup></p> <p><u>≥ 39</u><br/>RR: 0.93 [0.80 1.08]<sup>1</sup><br/>RR: 1.68 [1.51 1.87]<sup>2</sup></p> <p><b>Race</b></p> <p><u>Black</u><br/>RR: Ref.<br/>RR: Ref.</p> <p><u>Other</u><br/>RR: 1.32 [1.18 1.47]<sup>1</sup><br/>RR: 1.45 [1.36 1.54]<sup>2</sup></p> <p><u>White</u><br/>RR: 1.35 [1.25 1.47]<sup>1</sup><br/>RR: 1.58 [1.51 1.66]<sup>2</sup></p> <p><b>Marital Status</b></p> <p><u>Married</u><br/>RR: 1.13 [1.06 1.20]<sup>1</sup></p> |
|--|------------------------------------------------------------------------------------------------------------------------------|--------------------------------------------------------------------------------------------------------------------------------------------------|--------------------------------------------------------------------------------|---------------------------------------------------------------------------------------------------------------------------------------------------|------------------------------------------------------------------------------------------------------------------------------------------------------------------------------------------------------------------------------------------------------------------------------------------------------------------------------------------------------------------------------------------------------------------------------------------------------------------------------------------------------------------------------------------------------------------------------------------------------------------------------------------------------------------------------------------------------------------------------------------------------------------------------------------------------------------------------------------------------------------------------------------------------------------------------------------|

|                     |                                    |                  |                                           |                                           |                                       |                                                                                                                                                                                                                                                                                                                                                                                                                                                                                                                                                                                                                                                                                                                                                                                                                                                               |
|---------------------|------------------------------------|------------------|-------------------------------------------|-------------------------------------------|---------------------------------------|---------------------------------------------------------------------------------------------------------------------------------------------------------------------------------------------------------------------------------------------------------------------------------------------------------------------------------------------------------------------------------------------------------------------------------------------------------------------------------------------------------------------------------------------------------------------------------------------------------------------------------------------------------------------------------------------------------------------------------------------------------------------------------------------------------------------------------------------------------------|
|                     |                                    |                  |                                           |                                           |                                       | RR: 1.38 [1.32 1.44] <sup>2</sup><br><u>Other</u><br>RR: 1.59 [1.40 1.80] <sup>1</sup><br>RR: 1.72 [1.59 1.86] <sup>2</sup><br><u>Single</u><br>RR: Ref.<br>RR: Ref.<br><br><b>Rank</b><br><u>E1-E4</u><br>RR: 3.90 [3.19 4.77] <sup>1</sup><br>RR: 4.93 [4.31 5.63] <sup>2</sup><br><u>E5-E9</u><br>RR: 3.02 [2.47 3.70] <sup>1</sup><br>RR: 3.42 [3.02 3.89] <sup>2</sup><br><u>O1-O3</u><br>RR: 1.08 [0.84 1.38] <sup>1</sup><br>RR: 1.17 [1.00 1.36] <sup>2</sup><br><u>O4-O9</u><br>RR: Ref.<br>RR: Ref.<br><br><b>Service</b><br><u>Air Force</u><br>RR: Ref.<br>RR: Ref.<br><u>Army</u><br>RR: 3.80 [3.50 4.12] <sup>1</sup><br>RR: 3.80 [3.59 4.02] <sup>2</sup><br><u>Marines</u><br>RR: 2.90 [2.63 3.19] <sup>1</sup><br>RR: 2.92 [2.73 3.12] <sup>2</sup><br><u>Navy</u><br>RR: 1.38 [1.25 1.52] <sup>1</sup><br>RR: 1.51 [1.41 1.61] <sup>2</sup> |
| 8. Chiu, 2011<br>26 | <u>Name:</u> FDNY pension database | <u>n</u> = 1,915 | <u>Exposure assessment:</u><br>Deployment | <u>Type of symptoms:</u><br>PTSD symptoms | Unadjusted (model 1) and adjusted for | <b>Exposure group</b><br><u>morning of 9/11</u>                                                                                                                                                                                                                                                                                                                                                                                                                                                                                                                                                                                                                                                                                                                                                                                                               |

|  |                                                                                                             |                                                                                                                                                                                                                                                                                                                                                                                                      |                                                                                                                                                |                                                                                                                                                                         |                                                        |                                                                                                                                                                                                                                                                                                                                                                                                                                                                                                                                                                                                                                                                                                                                                                                                                                                                                                                               |
|--|-------------------------------------------------------------------------------------------------------------|------------------------------------------------------------------------------------------------------------------------------------------------------------------------------------------------------------------------------------------------------------------------------------------------------------------------------------------------------------------------------------------------------|------------------------------------------------------------------------------------------------------------------------------------------------|-------------------------------------------------------------------------------------------------------------------------------------------------------------------------|--------------------------------------------------------|-------------------------------------------------------------------------------------------------------------------------------------------------------------------------------------------------------------------------------------------------------------------------------------------------------------------------------------------------------------------------------------------------------------------------------------------------------------------------------------------------------------------------------------------------------------------------------------------------------------------------------------------------------------------------------------------------------------------------------------------------------------------------------------------------------------------------------------------------------------------------------------------------------------------------------|
|  | <p><u>Design:</u><br/>Prospective longitudinal</p> <p><u>Follow-up period:</u><br/>4 years post-attack.</p> | <p><u>Country</u>= USA</p> <p><u>%Female</u>= 0%</p> <p><u>Age</u>= 47.0 (6.9) years</p> <p><u>Type of job/company</u>=<br/>New York fire department firefighters who were involved in the 9/11 WTC attacks.</p> <p><u>Inclusion/exclusion</u>= Fire marshals, females, those who retired due to mental health disability and those who did not first arrive at the disaster site were excluded.</p> | <p>administration</p> <p><u>Year of assessment:</u><br/>2001</p> <p><u>Exposure categories:</u><br/>Retirement status, rank, and exposure.</p> | <p><u>Way of assessment:</u><br/>Self-reported using the PTSD checklist (PCL-17) , using a cut-off <math>\geq 39</math> (range 17-85).</p> <p><u>Incidence:</u> 22%</p> | <p>all remaining exposures in the model (model 2).</p> | <p>OR: 4.9 [3.0 7.9]<sup>1</sup><br/>OR: 4.0 [2.5 6.6]<sup>2</sup><br/><u>afternoon of 9/11</u><br/>OR: 2.4 [1.5 3.7]<sup>1</sup><br/>OR: 2.1 [1.3 3.3]<sup>2</sup><br/><u>day 2</u><br/>OR: 1.7 [1.0 2.8]<sup>1</sup><br/>OR: 1.4 [0.9 2.4]<sup>2</sup><br/><u>day 3 to day 14</u><br/>OR: Ref.<br/>OR: Ref.</p> <p><b>Retirement status</b><br/><u>Disability</u><br/>OR: 1.9 [1.5 2.4]<sup>1</sup><br/>OR: 1.7 [1.4 2.2]<sup>2</sup><br/><u>Non-disability</u><br/>OR: Ref.<br/>OR: Ref.</p> <p><b>AUDIT score</b><br/><u><math>\geq 8</math></u><br/>OR: 2.0 [1.5 2.5]<sup>1</sup><br/>OR: 1.9 [1.5 2.4]<sup>2</sup><br/><u><math>&lt; 8</math></u><br/>OR: Ref.<br/>OR: Ref.</p> <p><b>Age on 9/11 [in years]</b><br/><u><math>&lt; 55</math></u><br/>OR: 2.0 [1.4 3.0]<sup>1</sup><br/>OR: 1.5 [1.0 3.0]<sup>2</sup><br/><u><math>\geq 55</math></u><br/>OR: Ref.<br/>OR: Ref.</p> <p><b>Age on 9/11 - in years</b></p> |
|--|-------------------------------------------------------------------------------------------------------------|------------------------------------------------------------------------------------------------------------------------------------------------------------------------------------------------------------------------------------------------------------------------------------------------------------------------------------------------------------------------------------------------------|------------------------------------------------------------------------------------------------------------------------------------------------|-------------------------------------------------------------------------------------------------------------------------------------------------------------------------|--------------------------------------------------------|-------------------------------------------------------------------------------------------------------------------------------------------------------------------------------------------------------------------------------------------------------------------------------------------------------------------------------------------------------------------------------------------------------------------------------------------------------------------------------------------------------------------------------------------------------------------------------------------------------------------------------------------------------------------------------------------------------------------------------------------------------------------------------------------------------------------------------------------------------------------------------------------------------------------------------|

|                                   |                                                      |                                |                                                                                  |                                                                     |                                                        |                                                                                                                                                                                                                                                                                                                                                                                                                                                                                                                                                                                                                                                                                                                                                                                                          |
|-----------------------------------|------------------------------------------------------|--------------------------------|----------------------------------------------------------------------------------|---------------------------------------------------------------------|--------------------------------------------------------|----------------------------------------------------------------------------------------------------------------------------------------------------------------------------------------------------------------------------------------------------------------------------------------------------------------------------------------------------------------------------------------------------------------------------------------------------------------------------------------------------------------------------------------------------------------------------------------------------------------------------------------------------------------------------------------------------------------------------------------------------------------------------------------------------------|
|                                   |                                                      |                                |                                                                                  |                                                                     |                                                        | <p><u>Continuous</u><br/>OR: 1.0 [1.0 1.0]<sup>1</sup></p> <p><b>Marital status</b><br/><u>Married</u><br/>OR: 0.8 [0.6 1.2]<sup>1</sup><br/><u>Living with a partner</u><br/>OR: 1.1 [0.6 2.1]<sup>1</sup><br/><u>Never married</u><br/>OR: 0.9 [0.5 1.6]<sup>1</sup><br/><u>Separated/widowed/divorced</u><br/>OR: Ref.</p> <p><b>Marital status change since 9/11</b><br/><u>Status change</u><br/>OR: 1.3 [0.9 1.9]<sup>1</sup><br/><u>No change</u><br/>OR: Ref.</p> <p><b>Previous profession</b><br/><u>No other profession</u><br/>OR: 1.2 [0.9 1.4]<sup>1</sup><br/><u>Other professions</u><br/>OR: Ref.</p> <p><b>Rank</b><br/><u>Chiefs</u><br/>OR: 0.5 [0.3 0.9]<sup>1</sup><br/><u>Captains and lieutenants</u><br/>OR: 0.8 [0.6 1.0]<sup>1</sup><br/><u>Firefighters</u><br/>OR: Ref.</p> |
| 9. Ciarleglio, 2018 <sup>27</sup> | Name: VU Cooperative Studies Program Study, combined | n= 375<br><u>Country</u> = USA | <u>Exposure assessment</u> :<br>Self-reported<br><br><u>Year of assessment</u> : | <u>Type of symptoms</u> :<br>PTSD<br><br><u>Way of assessment</u> : | Multivariate models adjusting for all other exposures. | <b>Age in years</b><br>OR: 1.04 [0.99 1.09]<br><br><b>Gender</b>                                                                                                                                                                                                                                                                                                                                                                                                                                                                                                                                                                                                                                                                                                                                         |

|  |                                                                                                                                                                                                                                                   |                                                                                                                                                                                   |                                                                                                 |                                                                                              |                                                                                                                                                                                                                                                                                                                                                                                                                                                                                                                                                                                                                                                                                                                                                                  |
|--|---------------------------------------------------------------------------------------------------------------------------------------------------------------------------------------------------------------------------------------------------|-----------------------------------------------------------------------------------------------------------------------------------------------------------------------------------|-------------------------------------------------------------------------------------------------|----------------------------------------------------------------------------------------------|------------------------------------------------------------------------------------------------------------------------------------------------------------------------------------------------------------------------------------------------------------------------------------------------------------------------------------------------------------------------------------------------------------------------------------------------------------------------------------------------------------------------------------------------------------------------------------------------------------------------------------------------------------------------------------------------------------------------------------------------------------------|
|  | <p>with data from Neurocognition Deployment Health Study (NDHS).</p> <p><b>Design:</b><br/>Retrospective longitudinal</p> <p><b>Follow-up period:</b><br/>Between 5.7 months (baseline) and 7.5 months post-deployment (long-term follow-up).</p> | <p><u>%Female</u>= 5%</p> <p><u>Age</u>= 35.1 (5.9) years</p> <p><u>Type of job/company</u>=<br/>Army soldiers who were deployed in Iraq</p> <p><u>Inclusion/exclusion</u>= -</p> | <p>2003-2005</p> <p><u>Exposure categories:</u><br/>Deployment history and stress exposure.</p> | <p>Using a clinically administered PTSD scale.</p> <p><u>Incidence:</u> 24% (prevalence)</p> | <p><u>Male</u><br/>OR: Ref.</p> <p><u>Female</u><br/>OR: 0.31 [0.07 1.53]</p> <p><b>Number of deployments</b></p> <p><u>Single deployment</u><br/>OR: Ref.</p> <p><u>Multiple deployments</u><br/>OR: 0.83 [0.27 2.57]</p> <p><b>Months since most recent deployment</b><br/>OR: 1.00 [0.98 1.02]</p> <p><b>Composite emotional health factor post-deployment</b><br/>OR: 1.09 [0.79 1.50]</p> <p><b>Mental health treatment received post-deployment</b></p> <p><u>No</u><br/>OR: Ref.</p> <p><u>Yes</u><br/>OR: 4.12 [2.18 7.80]</p> <p><b>Early life events summary score</b><br/>OR: 0.92 [0.84 1.00]</p> <p><b>Combat and post-battle experiences</b><br/>OR: 0.99 [0.95 1.03]</p> <p><b>Deployment concerns summary score</b><br/>OR: 1.01 [0.98 1.04]</p> |
|--|---------------------------------------------------------------------------------------------------------------------------------------------------------------------------------------------------------------------------------------------------|-----------------------------------------------------------------------------------------------------------------------------------------------------------------------------------|-------------------------------------------------------------------------------------------------|----------------------------------------------------------------------------------------------|------------------------------------------------------------------------------------------------------------------------------------------------------------------------------------------------------------------------------------------------------------------------------------------------------------------------------------------------------------------------------------------------------------------------------------------------------------------------------------------------------------------------------------------------------------------------------------------------------------------------------------------------------------------------------------------------------------------------------------------------------------------|

|                      |                                                                                                                                                |                                                                                                                                                                                                                                                                                                                                              |                                                                                                                                                                                             |                                                                                                                                                                                                     |                                    |                                                                                                                                                                                                                                                                                                                                                                                                                                                                                       |
|----------------------|------------------------------------------------------------------------------------------------------------------------------------------------|----------------------------------------------------------------------------------------------------------------------------------------------------------------------------------------------------------------------------------------------------------------------------------------------------------------------------------------------|---------------------------------------------------------------------------------------------------------------------------------------------------------------------------------------------|-----------------------------------------------------------------------------------------------------------------------------------------------------------------------------------------------------|------------------------------------|---------------------------------------------------------------------------------------------------------------------------------------------------------------------------------------------------------------------------------------------------------------------------------------------------------------------------------------------------------------------------------------------------------------------------------------------------------------------------------------|
|                      |                                                                                                                                                |                                                                                                                                                                                                                                                                                                                                              |                                                                                                                                                                                             |                                                                                                                                                                                                     |                                    | <p><b>Life and family concerns</b><br/>OR: 0.99 [0.94 1.03]</p> <p><b>Post-deployment life events summary score</b><br/>OR: 1.07 [0.96 1.19]</p> <p><b>Post-war-zone social support</b><br/>OR: 0.92 [0.89 0.95]</p>                                                                                                                                                                                                                                                                  |
| 10. Cone, 2015<br>28 | <p><b>Name:</b> World Trade Center Health Registry</p> <p><b>Design:</b> Prospective longitudinal</p> <p><b>Follow-up period:</b> 10 years</p> | <p><b>n=</b> 2,204</p> <p><b>Country=</b> USA</p> <p><b>%Female=</b> 13%</p> <p><b>Age=</b> 38 (median)</p> <p><b>Type of job/company=</b> Police responders to the 9/11 WTC attacks</p> <p><b>Inclusion/exclusion=</b> Those with at least one shift at the disaster site, those without pre-9/11 PTSD and with follow-up measurements.</p> | <p><b>Exposure assessment:</b> Self-reported</p> <p><b>Year of assessment:</b> 2001</p> <p><b>Exposure categories:</b> Demographic, injury, stressors, life threatening event, support.</p> | <p><b>Type of symptoms:</b> Probable PTSD</p> <p><b>Way of assessment:</b> Self-reported using a combination of the PCL checklist and DSM-4 criteria.</p> <p><b>Incidence:</b> 11% (prevalence)</p> | Adjusting for all other exposures. | <p><b>Age group at 9/11</b><br/><u>18-44</u><br/>OR: Ref.</p> <p><u>45-69</u><br/>OR: 0.6 [0.3 1.3]</p> <p><b>Gender</b><br/><u>Male</u><br/>OR: Ref.</p> <p><u>Female</u><br/>OR: 1.3 [0.7 2.5]</p> <p><b>Hispanic</b><br/><u>No</u><br/>OR: Ref.</p> <p><u>Yes</u><br/>OR: 1.2 [0.7 2.0]</p> <p><b>Household gross income at wave 3</b><br/><u>≥75K</u><br/>OR: Ref.</p> <p><u>&lt;75K</u><br/>OR: 2.0 [1.2 3.4]</p> <p><b>Having social support</b><br/><u>All of the time</u></p> |



|  |  |  |  |  |  |                                                                                                                                                                                                                                                                                                                                                                                                                                                                                                                                                                                                                                                                                                                                 |
|--|--|--|--|--|--|---------------------------------------------------------------------------------------------------------------------------------------------------------------------------------------------------------------------------------------------------------------------------------------------------------------------------------------------------------------------------------------------------------------------------------------------------------------------------------------------------------------------------------------------------------------------------------------------------------------------------------------------------------------------------------------------------------------------------------|
|  |  |  |  |  |  | <p>OR: Ref.<br/> <u>Most</u><br/> OR: 3.5 [2.0 6.1]<br/> <u>Some</u><br/> OR: 3.6 [1.9 6.9]<br/> <u>Little or none</u><br/> OR: 2.6 [1.04 6.5]</p> <p><b>Current employment status at wave 3</b><br/> <u>Employed</u><br/> OR: Ref.<br/> <u>Unable to work because of health</u><br/> OR: 3.7 [1.9 7.3]<br/> <u>Retired</u><br/> OR: 1.3 [0.8 2.2]<br/> <u>Other</u><br/> OR: 2.9 [0.8 10.1]</p> <p><b>Number of life stressors in last 12 months</b><br/> <u>None</u><br/> OR: Ref.<br/> <u>1 to 2</u><br/> OR: 1.7 [1.0 2.7]<br/> <u>≥3</u><br/> OR: 3.2 [1.2 8.5]</p> <p><b>Number of events threatened your life since 9/11</b><br/> <u>None</u><br/> OR: Ref.<br/> <u>1 to 2</u><br/> OR: 1.0 [0.5 1.9]<br/> <u>≥3</u></p> |
|--|--|--|--|--|--|---------------------------------------------------------------------------------------------------------------------------------------------------------------------------------------------------------------------------------------------------------------------------------------------------------------------------------------------------------------------------------------------------------------------------------------------------------------------------------------------------------------------------------------------------------------------------------------------------------------------------------------------------------------------------------------------------------------------------------|

|                                   |                                                                                                                                                        |                                                                                                                                                                                                                                                                                                                                                             |                                                                                                                                                                                                                                                   |                                                                                                                                                                                                   |                                                                                                         |                                                                                                                                                                                                                                                                                                                                                             |
|-----------------------------------|--------------------------------------------------------------------------------------------------------------------------------------------------------|-------------------------------------------------------------------------------------------------------------------------------------------------------------------------------------------------------------------------------------------------------------------------------------------------------------------------------------------------------------|---------------------------------------------------------------------------------------------------------------------------------------------------------------------------------------------------------------------------------------------------|---------------------------------------------------------------------------------------------------------------------------------------------------------------------------------------------------|---------------------------------------------------------------------------------------------------------|-------------------------------------------------------------------------------------------------------------------------------------------------------------------------------------------------------------------------------------------------------------------------------------------------------------------------------------------------------------|
|                                   |                                                                                                                                                        |                                                                                                                                                                                                                                                                                                                                                             |                                                                                                                                                                                                                                                   |                                                                                                                                                                                                   |                                                                                                         | <p>OR: 3.3 [1.9 5.6]</p> <p><b>Number of injuries sustained during the 9/11 attacks</b></p> <p><u>None</u><br/>OR: Ref.</p> <p><u>One</u><br/>OR: 1.1 [0.6 2.0]</p> <p><u>Two or more</u><br/>OR: 1.4 [0.6 3.4]</p> <p><b>Report of unmet mental health care needs at wave 3</b></p> <p><u>No</u><br/>OR: Ref.</p> <p><u>Yes</u><br/>OR: 9.5 [5.3 16.9]</p> |
| 11. Connorton, 2011 <sup>29</sup> | <p><b>Name:</b> National Comorbidity Survey Replication (NCS-R)</p> <p><b>Design:</b> Retrospective longitudinal</p> <p><b>Follow-up period:</b> -</p> | <p>n= 217 exposed and 2,110 unexposed.</p> <p><u>Country</u>=USA</p> <p><u>%Female</u>= 0%</p> <p><u>Age</u>= 55.0(0.9) for exposed workers, 43.8 (0.9) for non-exposed workers</p> <p><u>Type of job/company</u>= Participants employed in combat or service as peacekeeper or relief worker.</p> <p><u>Inclusion/exclusion</u>= Females were excluded</p> | <p><b>Exposure assessment:</b> Self-reported</p> <p><b>Year of assessment:</b> 2001-2002</p> <p><b>Exposure categories:</b> Participants who were exposed to combat and peacekeeping/relieve work or combat only vs non-exposed participants.</p> | <p><b>Type of symptoms:</b> PTSD (according to DSM-4 criteria)</p> <p><b>Way of assessment:</b> Self-reported (no specific questionnaire mentioned)</p> <p><b>Incidence:</b> 29/(217+2110)=1%</p> | <p>Univariate and multivariate analyses adjusting for age of exposure, age of onset diagnoses, race</p> | <p><b>Exposure</b></p> <p><u>No exposure</u><br/>OR: Ref</p> <p><u>Exposure to peacekeeping/relieve work and combat</u><br/>OR: 11.2 [2.9 43.2]</p> <p><u>Exposure to combat only</u><br/>OR: 7.3 [3.3 15.8]</p> <p>According to the authors the results remained the same in multivariate analyses (data not reported)</p>                                 |

|                       |                                                                                                                                                        |                                                                                                                                                                                                                                                   |                                                                                                                                                                                                           |                                                                                                                                                                                                                                                                                                                                                                                                            |                                                                                                     |                                                                                                                                                                                                                                                                                                                                                                       |
|-----------------------|--------------------------------------------------------------------------------------------------------------------------------------------------------|---------------------------------------------------------------------------------------------------------------------------------------------------------------------------------------------------------------------------------------------------|-----------------------------------------------------------------------------------------------------------------------------------------------------------------------------------------------------------|------------------------------------------------------------------------------------------------------------------------------------------------------------------------------------------------------------------------------------------------------------------------------------------------------------------------------------------------------------------------------------------------------------|-----------------------------------------------------------------------------------------------------|-----------------------------------------------------------------------------------------------------------------------------------------------------------------------------------------------------------------------------------------------------------------------------------------------------------------------------------------------------------------------|
| 12. Cukor, 2011<br>30 | <p><b>Name:</b> Weill Cornell 9/11 Screening Program</p> <p><b>Design:</b> Prospective longitudinal</p> <p><b>Follow-up period:</b> Up to 4 years.</p> | <p><b>n=</b> 2,960</p> <p><b>Country=</b> USA</p> <p><b>%Female=</b> -</p> <p><b>Age=</b> -</p> <p><b>Type of job/company=</b> 9/11 WTC disaster recovery workers.</p> <p><b>Inclusion/exclusion=</b> -</p>                                       | <p><b>Exposure assessment:</b> Self-reported</p> <p><b>Year of assessment:</b> 2002-2004</p> <p><b>Exposure categories:</b> Occupational exposure</p>                                                     | <p><b>Type of symptoms:</b> PTSD</p> <p><b>Way of assessment:</b> Using the CAPS standardized clinical interview and using the PCL-C questionnaire using DSM-4 criteria. CAPS data were used for exposure-outcome assessment.</p> <p><b>Incidence:</b> 9%, 5% and 2% had probable self-reported PTSD at T1, T2 and T3, respectively. 15%, 8% and 6% had diagnosed PTSD at T1, T2 and T3, respectively.</p> | <p>Adjusting for baseline PTSD and demographic variables.</p>                                       | <p><b>Occupational exposure</b></p> <p><b>No</b><br/>OR: Ref.</p> <p><b>Yes</b><br/>OR: 1.31 [1.13 1.51]</p>                                                                                                                                                                                                                                                          |
| 13. Fear, 2010<br>31  | <p><b>Name:</b> HERRICK cohort (and other samples)</p> <p><b>Design:</b> Prospective longitudinal</p> <p><b>Follow-up period:</b> -</p>                | <p><b>n=</b> 3600</p> <p><b>Country=</b> UK</p> <p><b>%Female=</b> -</p> <p><b>Age=</b> -</p> <p><b>Type of job/company=</b> Armed forces who were deployed in Iraq and Afghanistan, who were compared to armed forces who were not deployed.</p> | <p><b>Exposure assessment:</b> Deployment administration</p> <p><b>Year of assessment:</b> 2003</p> <p><b>Exposure categories:</b> Deployment, rank, number of deployments and time since deployment.</p> | <p><b>Type of symptoms:</b> PTSD symptoms</p> <p><b>Way of assessment:</b> Self-reporting using the PCL-C questionnaire.</p> <p><b>Incidence:</b> 4%</p>                                                                                                                                                                                                                                                   | <p>Unadjusted (model 1) and adjusted for age, sex, marital status, education and rank (model 2)</p> | <p><b>Deployment</b></p> <p><b>Not deployed</b><br/>OR: Ref.</p> <p><b>Regulars</b><br/>OR: 1.03 [0.79 1.36]<sup>1</sup><br/>OR: 1.13 [0.82 1.54]<sup>2</sup></p> <p><b>Reservists</b><br/>OR: 2.90 [1.37 6.12]<sup>1</sup><br/>OR: 2.83 [1.23 6.51]<sup>2</sup></p> <p><b>Location of deployment</b></p> <p><b>Not deployed in Iraq/Afghanistan</b><br/>OR: Ref.</p> |

|  |  |                               |  |  |  |                                                                                                                                                                                                                                                                                                                                                                                                                                                                                                                                                                                                                                                                                                                                                                                                                                                                                                                                                                                                  |
|--|--|-------------------------------|--|--|--|--------------------------------------------------------------------------------------------------------------------------------------------------------------------------------------------------------------------------------------------------------------------------------------------------------------------------------------------------------------------------------------------------------------------------------------------------------------------------------------------------------------------------------------------------------------------------------------------------------------------------------------------------------------------------------------------------------------------------------------------------------------------------------------------------------------------------------------------------------------------------------------------------------------------------------------------------------------------------------------------------|
|  |  | <u>Inclusion/exclusion= -</u> |  |  |  | <p><u>Deployed in Iraq</u><br/>OR: 1.20 [0.87 1.67]<sup>2</sup></p> <p><u>Deployed in Afghanistan</u><br/>OR: 0.93 [0.54 1.59]<sup>2</sup></p> <p><u>Deployed in Iraq and Afghanistan</u><br/>OR: 0.92 [0.58 1.46]<sup>2</sup></p> <p><b>Role of deployment</b></p> <p><u>Combat service report</u><br/>OR: Ref.<br/>OR: Ref.</p> <p><u>Combat</u><br/>OR: 1.99 [1.42 2.78]<sup>1</sup><br/>OR: 1.87 [1.26 2.78]<sup>2</sup></p> <p><u>Service support</u><br/>OR: 0.58 [0.28 1.19]<sup>1</sup><br/>OR: 0.67 [0.32 1.41]<sup>2</sup></p> <p><b>Number of deployments</b></p> <p><u>One deployment</u><br/>OR: Ref.<br/>OR: Ref.</p> <p><u>Two deployments</u><br/>OR: 0.83 [0.51 1.36]<sup>1</sup><br/>OR: 0.96 [0.58 1.57]<sup>2</sup></p> <p><u>More than three deployments</u><br/>OR: 0.61 [0.29 1.26]<sup>1</sup><br/>OR: 0.72 [0.34 1.50]<sup>2</sup></p> <p><b>Time since return from deployment</b></p> <p><u>Up to 1 year</u><br/>OR: Ref.<br/>OR: Ref.</p> <p><u>Up to 2 years</u></p> |
|--|--|-------------------------------|--|--|--|--------------------------------------------------------------------------------------------------------------------------------------------------------------------------------------------------------------------------------------------------------------------------------------------------------------------------------------------------------------------------------------------------------------------------------------------------------------------------------------------------------------------------------------------------------------------------------------------------------------------------------------------------------------------------------------------------------------------------------------------------------------------------------------------------------------------------------------------------------------------------------------------------------------------------------------------------------------------------------------------------|

|                                  |                                                                                                                  |                                                                                                                                                                                                                                                                                                                                                                                                                    |                                                                                                                                                                                         |                                                                                                                                                                                                                        |                   |                                                                                                                                                                                                                                                                                                                                                                                                                                                                                                         |
|----------------------------------|------------------------------------------------------------------------------------------------------------------|--------------------------------------------------------------------------------------------------------------------------------------------------------------------------------------------------------------------------------------------------------------------------------------------------------------------------------------------------------------------------------------------------------------------|-----------------------------------------------------------------------------------------------------------------------------------------------------------------------------------------|------------------------------------------------------------------------------------------------------------------------------------------------------------------------------------------------------------------------|-------------------|---------------------------------------------------------------------------------------------------------------------------------------------------------------------------------------------------------------------------------------------------------------------------------------------------------------------------------------------------------------------------------------------------------------------------------------------------------------------------------------------------------|
|                                  |                                                                                                                  |                                                                                                                                                                                                                                                                                                                                                                                                                    |                                                                                                                                                                                         |                                                                                                                                                                                                                        |                   | <p>OR: 1.19 [0.76 1.86]<sup>1</sup><br/> OR: 1.18 [0.75 1.86]<sup>2</sup><br/> <u>Up to 3 years</u><br/> OR: 1.95 [1.16 3.27]<sup>1</sup><br/> OR: 1.80 [1.05 3.10]<sup>2</sup><br/> <u>Up to 4 years</u><br/> OR: 1.98 [1.08 3.65]<sup>1</sup><br/> OR: 1.88 [0.98 3.62]<sup>2</sup><br/> <u>Up to 5 years</u><br/> OR: 1.59 [0.99 2.57]<sup>1</sup><br/> OR: 1.53 [0.92 2.55]<sup>2</sup><br/> <u>Up to 6.5 years</u><br/> OR: 1.79 [0.98 3.26]<sup>1</sup><br/> OR: 1.89 [0.99 3.60]<sup>2</sup></p> |
| 14. Ferrajao, 2016 <sup>32</sup> | <p><u>Name:</u> -</p> <p><u>Design:</u><br/>Retrospective longitudinal</p> <p><u>Follow-up period:</u><br/>-</p> | <p><u>n</u>= 120</p> <p><u>Country</u>= Portugal</p> <p><u>%Female</u>= 0%</p> <p><u>Age</u>= 64 [59-72]</p> <p><u>Type of job/company</u>=<br/>Colonial war veterans</p> <p><u>Inclusion/exclusion</u>=<br/>Participants who received psychiatric and psychological treatment during the last 5 years, and no history of traumatic brain injury, neurological disorders or physical disability were included.</p> | <p><u>Exposure assessment:</u><br/>Self-reported.</p> <p><u>Year of assessment:</u> -</p> <p><u>Exposure categories:</u><br/>Combat exposure, abusive violence, sense of coherence.</p> | <p><u>Type of symptoms:</u><br/>PTSD symptoms</p> <p><u>Way of assessment:</u><br/>Self-reported using the Impact of Event Scale Revised (with a cut-off score: &gt;=33)</p> <p><u>Incidence:</u> 41% (prevalence)</p> | Unadjusted        | <p><b>Combat exposure scale [1 5]</b><br/>OR: 1.98 [1.50, 2.62]</p> <p><b>Sense of coherence</b><br/>OR: -5.08 [-3.32, -7.78]</p> <p><b>Observation of abusive violence</b><br/><u>No</u><br/>OR: Ref.<br/><u>Yes</u><br/>OR: 8.36 [4.56, 15.35]</p> <p><b>Participation in abusive violence</b><br/><u>No</u><br/>OR: Ref.<br/><u>Yes</u><br/>OR: 3.32 [1.81, 6.08]</p>                                                                                                                                |
| 15. Fichera,                     | <u>Name:</u> -                                                                                                   | <u>n</u> = 383                                                                                                                                                                                                                                                                                                                                                                                                     | <u>Exposure assessment:</u>                                                                                                                                                             | <u>Type of symptoms:</u>                                                                                                                                                                                               | Adjusting for all | <b>Number of robberies during</b>                                                                                                                                                                                                                                                                                                                                                                                                                                                                       |

|                    |                                                                                                                                                              |                                                                                                                                                                                                                                                                                                                             |                                                                                                                                                                                                           |                                                                                                                                     |                                                                                                                                                                               |                                                                                                                                                                                                                                                                                                                                                                                                                                                                                                                                                                                                                                                                                                                                                                                                                                                                                                                                                                     |
|--------------------|--------------------------------------------------------------------------------------------------------------------------------------------------------------|-----------------------------------------------------------------------------------------------------------------------------------------------------------------------------------------------------------------------------------------------------------------------------------------------------------------------------|-----------------------------------------------------------------------------------------------------------------------------------------------------------------------------------------------------------|-------------------------------------------------------------------------------------------------------------------------------------|-------------------------------------------------------------------------------------------------------------------------------------------------------------------------------|---------------------------------------------------------------------------------------------------------------------------------------------------------------------------------------------------------------------------------------------------------------------------------------------------------------------------------------------------------------------------------------------------------------------------------------------------------------------------------------------------------------------------------------------------------------------------------------------------------------------------------------------------------------------------------------------------------------------------------------------------------------------------------------------------------------------------------------------------------------------------------------------------------------------------------------------------------------------|
| 2015 <sup>33</sup> | <p><u>Design:</u><br/>Prospective longitudinal, with baseline 7-15 days post-robbery</p> <p><u>Follow-up period:</u><br/>45 days after the first session</p> | <p><u>Country</u>= Italy</p> <p><u>%Female</u>= 52%</p> <p><u>Age</u>= 43 (9) years</p> <p><u>Type of job/company</u>=<br/>Employees of a large bank who were victims of robberies.</p> <p><u>Inclusion/exclusion</u>=<br/>Participants who had voluntarily joined and employer sponsored post-robbery support program.</p> | <p>Self-reported (questionnaires and interviews)</p> <p><u>Year of assessment:</u><br/>2010-2012</p> <p><u>Exposure categories:</u><br/>Personal characteristics and characteristics of the robberies</p> | <p>PTSD</p> <p><u>Way of assessment:</u><br/>Self-reported using the Impact of Events Scale (IES).</p> <p><u>Incidence:</u> 14%</p> | <p>other exposures (model 1), when additionally adjusting for baseline PTSD (model 2), and the latter two models in which random intercepts were adopted (model 3 and 4).</p> | <p><b>working life</b><br/>OR: 1.25 [1.07 1.44]<sup>1</sup><br/>OR: 1.15 [0.97 1.36]<sup>2</sup><br/>OR: 1.27 [1.07 1.51]<sup>3</sup><br/>OR: 1.18 [0.97 1.44]<sup>4</sup></p> <p><b>Gender</b><br/><u>Males</u><br/>OR: Ref<sup>1</sup><br/>OR: Ref<sup>2</sup><br/>OR: Ref<sup>3</sup><br/>OR: Ref<sup>4</sup><br/><u>Females</u><br/>OR: 0.63 [0.31 1.29]<sup>1</sup><br/>OR: 0.72 [0.33 1.58]<sup>2</sup><br/>OR: 0.77 [0.34 1.78]<sup>3</sup><br/>OR: 0.85 [0.33 2.13]<sup>4</sup></p> <p><b>Being cashier</b><br/><u>No</u><br/>OR: Ref<sup>1</sup><br/>OR: Ref<sup>2</sup><br/>OR: Ref<sup>3</sup><br/>OR: Ref<sup>4</sup><br/><u>Yes</u><br/>OR: 0.52 [0.22 1.22]<sup>1</sup><br/>OR: 0.94 [0.36 2.42]<sup>2</sup><br/>OR: 0.40 [0.14 1.07]<sup>3</sup><br/>OR: 0.76 [0.25 2.25]<sup>4</sup></p> <p><b>Physical contacts with robbers</b><br/><u>No</u><br/>OR: Ref<sup>1</sup><br/>OR: Ref<sup>2</sup><br/>OR: Ref<sup>3</sup><br/>OR: Ref<sup>4</sup></p> |
|--------------------|--------------------------------------------------------------------------------------------------------------------------------------------------------------|-----------------------------------------------------------------------------------------------------------------------------------------------------------------------------------------------------------------------------------------------------------------------------------------------------------------------------|-----------------------------------------------------------------------------------------------------------------------------------------------------------------------------------------------------------|-------------------------------------------------------------------------------------------------------------------------------------|-------------------------------------------------------------------------------------------------------------------------------------------------------------------------------|---------------------------------------------------------------------------------------------------------------------------------------------------------------------------------------------------------------------------------------------------------------------------------------------------------------------------------------------------------------------------------------------------------------------------------------------------------------------------------------------------------------------------------------------------------------------------------------------------------------------------------------------------------------------------------------------------------------------------------------------------------------------------------------------------------------------------------------------------------------------------------------------------------------------------------------------------------------------|

|  |  |  |  |  |  |                                                                                                                                                                                                                                                                                                                                                                                                                                                                                                                                                                                                                                                                                                                                                                                                                                                                                                                                                                                   |
|--|--|--|--|--|--|-----------------------------------------------------------------------------------------------------------------------------------------------------------------------------------------------------------------------------------------------------------------------------------------------------------------------------------------------------------------------------------------------------------------------------------------------------------------------------------------------------------------------------------------------------------------------------------------------------------------------------------------------------------------------------------------------------------------------------------------------------------------------------------------------------------------------------------------------------------------------------------------------------------------------------------------------------------------------------------|
|  |  |  |  |  |  | <p><u>Yes</u><br/>OR: 1.21 [0.58 2.54]<sup>1</sup><br/>OR: 0.83 [0.36 1.87]<sup>2</sup><br/>OR: 1.23 [0.50 2.98]<sup>3</sup><br/>OR: 0.86 [0.32 2.28]<sup>4</sup></p> <p><b>Scuffle [taking part or being present]</b></p> <p><u>No</u><br/>OR: Ref<sup>1</sup><br/>OR: Ref<sup>2</sup><br/>OR: Ref<sup>3</sup><br/>OR: Ref<sup>4</sup></p> <p><u>Yes</u><br/>OR: 1.41 [0.61 3.27]<sup>1</sup><br/>OR: 1.64 [0.64 4.20]<sup>2</sup><br/>OR: 1.72 [0.62 4.78]<sup>3</sup><br/>OR: 1.92 [0.63 5.79]<sup>4</sup></p> <p><b>Being injured during the robbery</b></p> <p><u>No</u><br/>OR: Ref<sup>1</sup><br/>OR: Ref<sup>2</sup><br/>OR: Ref<sup>3</sup><br/>OR: Ref<sup>4</sup></p> <p><u>Yes</u><br/>OR: 1.69 [0.58 4.89]<sup>1</sup><br/>OR: 1.44 [0.44 4.73]<sup>2</sup><br/>OR: 1.81 [0.49 6.61]<sup>3</sup><br/>OR: 1.28 [0.31 5.21]<sup>4</sup></p> <p><b>Worried by other issues related to robbery</b></p> <p><u>No</u><br/>OR: Ref<sup>1</sup><br/>OR: Ref<sup>2</sup></p> |
|--|--|--|--|--|--|-----------------------------------------------------------------------------------------------------------------------------------------------------------------------------------------------------------------------------------------------------------------------------------------------------------------------------------------------------------------------------------------------------------------------------------------------------------------------------------------------------------------------------------------------------------------------------------------------------------------------------------------------------------------------------------------------------------------------------------------------------------------------------------------------------------------------------------------------------------------------------------------------------------------------------------------------------------------------------------|

|  |  |  |  |  |  |                                                                                                                                                                                                                                                                                                                                                                                                                                                                                                                                                                                                                                                                                                                                                                                                                                                                                                                                                                                                                                                             |
|--|--|--|--|--|--|-------------------------------------------------------------------------------------------------------------------------------------------------------------------------------------------------------------------------------------------------------------------------------------------------------------------------------------------------------------------------------------------------------------------------------------------------------------------------------------------------------------------------------------------------------------------------------------------------------------------------------------------------------------------------------------------------------------------------------------------------------------------------------------------------------------------------------------------------------------------------------------------------------------------------------------------------------------------------------------------------------------------------------------------------------------|
|  |  |  |  |  |  | <p>OR: Ref<sup>3</sup><br/> OR: Ref<sup>4</sup><br/> <u>Yes</u><br/> OR: 2.47 [1.16 5.27]<sup>1</sup><br/> OR: 2.11 [0.91 4.91]<sup>2</sup><br/> OR: 2.88 [1.16 7.19]<sup>3</sup><br/> OR: 2.64 [0.95 7.36]<sup>4</sup></p> <p><b>Feeling terror and hopelessness</b><br/> <u>True</u><br/> OR: 6.96 [2.25 21.53]<sup>1</sup><br/> OR: 1.19 [0.32 4.36]<sup>2</sup><br/> OR: 8.64 [2.19 34.10]<sup>3</sup><br/> OR: 1.59 [0.33 7.58]<sup>4</sup><br/> <u>Partly true</u><br/> OR: 2.82 [0.98 8.10]<sup>1</sup><br/> OR: 1.10 [0.33 3.65]<sup>2</sup><br/> OR: 3.48 [1.00 12.12]<sup>3</sup><br/> OR: 1.45 [0.35 6.02]<sup>4</sup></p> <p><b>Post-session individual interview requested</b><br/> <u>No</u><br/> OR: Ref<sup>1</sup><br/> OR: Ref<sup>2</sup><br/> OR: Ref<sup>3</sup><br/> OR: Ref<sup>4</sup><br/> <u>Yes</u><br/> OR: 1.09 [0.29 4.09]<sup>1</sup><br/> OR: 0.41 [0.09 1.81]<sup>2</sup><br/> OR: 0.75 [0.14 4.07]<sup>3</sup><br/> OR: 0.35 [0.06 2.07]<sup>4</sup></p> <p><b>PTSD at T1</b><br/> <u>No</u><br/> OR: Ref<sup>1</sup></p> |
|--|--|--|--|--|--|-------------------------------------------------------------------------------------------------------------------------------------------------------------------------------------------------------------------------------------------------------------------------------------------------------------------------------------------------------------------------------------------------------------------------------------------------------------------------------------------------------------------------------------------------------------------------------------------------------------------------------------------------------------------------------------------------------------------------------------------------------------------------------------------------------------------------------------------------------------------------------------------------------------------------------------------------------------------------------------------------------------------------------------------------------------|



|                              |                                                                                                                                                    |                                                                                                                                                                                           |                                                                                                                                                                                   |                                                                                                                                                                                                                                                                                                                                                 |                                                                                                   |                                                                                                                                                                                                                                                                                                                                                                                                                                                                                                                                                                                                                                                                                                                                                                                                                  |
|------------------------------|----------------------------------------------------------------------------------------------------------------------------------------------------|-------------------------------------------------------------------------------------------------------------------------------------------------------------------------------------------|-----------------------------------------------------------------------------------------------------------------------------------------------------------------------------------|-------------------------------------------------------------------------------------------------------------------------------------------------------------------------------------------------------------------------------------------------------------------------------------------------------------------------------------------------|---------------------------------------------------------------------------------------------------|------------------------------------------------------------------------------------------------------------------------------------------------------------------------------------------------------------------------------------------------------------------------------------------------------------------------------------------------------------------------------------------------------------------------------------------------------------------------------------------------------------------------------------------------------------------------------------------------------------------------------------------------------------------------------------------------------------------------------------------------------------------------------------------------------------------|
|                              |                                                                                                                                                    |                                                                                                                                                                                           |                                                                                                                                                                                   |                                                                                                                                                                                                                                                                                                                                                 |                                                                                                   | OR: Ref <sup>2</sup><br>OR: Ref <sup>3</sup><br>OR: Ref <sup>4</sup><br><u>Yes</u><br>OR: –<br>OR: 1.11 [1.07 1.15] <sup>2</sup><br>OR: –<br>OR: 1.11 [1.07 1.16] <sup>4</sup>                                                                                                                                                                                                                                                                                                                                                                                                                                                                                                                                                                                                                                   |
| 16. Fink, 2016 <sup>34</sup> | <p><b>Name:</b> Reserve and National Guard (RNG) study.</p> <p><b>Design:</b> Prospective longitudinal</p> <p><b>Follow-up period:</b> 4 years</p> | <p><b>n=</b> 2,003</p> <p><b>Country=</b> USA</p> <p><b>%Female=</b> 18%</p> <p><b>Age=</b> -</p> <p><b>Type of job/company=</b> Army reservists</p> <p><b>Inclusion/exclusion=</b> -</p> | <p><b>Exposure assessment:</b> Self-reported</p> <p><b>Year of assessment:</b> 2010</p> <p><b>Exposure categories:</b> Personal characteristics, deployment history and rank.</p> | <p><b>Type of symptoms:</b> PTSD</p> <p><b>Way of assessment:</b> Self-reported using the PCL-C checklist, based on DSM-4 criteria. Criteria that sensitive and specific were used leading to two different PTSD definitions.</p> <p><b>Incidence:</b> 4.7 and 2.9 per 100 person-year for sensitive and specific definition, respectively.</p> | <p>Univariate models using the sensitive (model 1) and specific (model 2) outcome definition.</p> | <p>Effects in incidence rate (IR) per 100/per-years</p> <p><b>Age</b></p> <p><b>18–24 years</b><br/>IR: 4.8 [3.0–7.5]<sup>1</sup><br/>IR: 1.9 [0.8–4.3]<sup>2</sup></p> <p><b>25–34 years</b><br/>IR: 4.4 [3.2–6.1]<sup>1</sup><br/>IR: 2.9 [1.9–4.4]<sup>2</sup></p> <p><b>&gt;35 years</b><br/>IR: 4.9 [3.8–6.3]<sup>1</sup><br/>IR: 3.4 [2.5–4.7]<sup>2</sup></p> <p><b>Sex</b></p> <p><b>Male</b><br/>IR: 4.6 [3.8–5.7]<sup>1</sup><br/>IR: 3.2 [2.5–4.2]<sup>2</sup></p> <p><b>Female</b><br/>IR: 4.9 [3.2–7.4]<sup>1</sup><br/>IR: 1.4 [0.7–2.8]<sup>2</sup></p> <p><b>Race/ethnicity</b></p> <p><b>Non-Hispanic, white</b><br/>IR: 4.3 [3.4–5.3]<sup>1</sup><br/>IR: 2.4 [1.8–3.3]<sup>2</sup></p> <p><b>Non-Hispanic, black</b><br/>IR: 6.4 [4.0–10.2]<sup>1</sup><br/>IR: 4.6 [2.6–8.2]<sup>2</sup></p> |

|  |  |  |  |  |  |                                                                                                                                                                                                                                                                                                                                                                                                                                                                                                                                                                                                                                                                                                                                                                                                                                                                                                                                                                                                                                                                                                        |
|--|--|--|--|--|--|--------------------------------------------------------------------------------------------------------------------------------------------------------------------------------------------------------------------------------------------------------------------------------------------------------------------------------------------------------------------------------------------------------------------------------------------------------------------------------------------------------------------------------------------------------------------------------------------------------------------------------------------------------------------------------------------------------------------------------------------------------------------------------------------------------------------------------------------------------------------------------------------------------------------------------------------------------------------------------------------------------------------------------------------------------------------------------------------------------|
|  |  |  |  |  |  | <p><b>Hispanic</b><br/> IR: 5.5 [3.3–9.1]<sup>1</sup><br/> IR: 4.3 [2.4–7.6]<sup>2</sup></p> <p><b>Other</b><br/> IR: 5.3 [3.0–9.1]<sup>1</sup><br/> IR: 3.8 [2.0–7.2]<sup>2</sup></p> <p><b>Education</b><br/> <u>&lt; High school</u><br/> IR: 4.2 [1.0–16.6]<sup>1</sup><br/> IR: 7.9 [2.1–29.1]<sup>2</sup><br/> <u>High school</u><br/> IR: 6.1 [3.9–9.4]<sup>1</sup><br/> IR: 3.6 [2.0–6.4]<sup>2</sup><br/> <u>Some college</u><br/> IR: 4.8 [3.7–6.2]<sup>1</sup><br/> IR: 2.8 [2.0–3.8]<sup>2</sup><br/> <u>&gt; College</u><br/> IR: 3.5 [2.6–4.8]<sup>1</sup><br/> IR: 2.3 [1.6–3.4]<sup>2</sup></p> <p><b>Marital status</b><br/> <u>Never married</u><br/> IR: 3.9 [2.7–5.7]<sup>1</sup><br/> IR: 2.3 [1.3–4.0]<sup>2</sup><br/> <u>Married</u><br/> IR: 4.9 [3.8–6.2]<sup>1</sup><br/> IR: 2.9 [2.1–4.0]<sup>2</sup><br/> <u>Previously married</u><br/> IR: 6.1 [3.9–9.5]<sup>1</sup><br/> IR: 4.8 [3.0–7.6]<sup>2</sup></p> <p><b>Rank</b><br/> <u>Junior enlisted</u><br/> IR: 4.4 [2.2–8.8]<sup>1</sup><br/> IR: 1.2 [0.4–3.4]<sup>2</sup><br/> <u>Non-Commissioned Officers</u></p> |
|--|--|--|--|--|--|--------------------------------------------------------------------------------------------------------------------------------------------------------------------------------------------------------------------------------------------------------------------------------------------------------------------------------------------------------------------------------------------------------------------------------------------------------------------------------------------------------------------------------------------------------------------------------------------------------------------------------------------------------------------------------------------------------------------------------------------------------------------------------------------------------------------------------------------------------------------------------------------------------------------------------------------------------------------------------------------------------------------------------------------------------------------------------------------------------|

|  |  |  |  |  |  |                                                                                                                                                                                                                                                                                                                                                                                                                                                                                                                                                                                                                                                                                                                                                                                                                                                                                                                                                                                                                         |
|--|--|--|--|--|--|-------------------------------------------------------------------------------------------------------------------------------------------------------------------------------------------------------------------------------------------------------------------------------------------------------------------------------------------------------------------------------------------------------------------------------------------------------------------------------------------------------------------------------------------------------------------------------------------------------------------------------------------------------------------------------------------------------------------------------------------------------------------------------------------------------------------------------------------------------------------------------------------------------------------------------------------------------------------------------------------------------------------------|
|  |  |  |  |  |  | <p>IR: 5.1 [4.1–6.2]<sup>1</sup><br/> IR: 3.4 [2.6–4.4]<sup>2</sup><br/> <u>Officer</u><br/> IR: 3.0 [2.0–4.5]<sup>1</sup><br/> IR: 1.4 [0.8–2.5]<sup>2</sup></p> <p><b>Number of baseline deployments</b><br/> <u>Zero</u><br/> IR: 3.9 [2.5–5.9]<sup>1</sup><br/> IR: 1.4 [0.7–2.5]<sup>2</sup><br/> <u>One</u><br/> IR: 4.8 [3.4–6.7]<sup>1</sup><br/> IR: 3.9 [2.6–5.9]<sup>2</sup><br/> <u>Two</u><br/> IR: 5.1 [3.7–7.0]<sup>1</sup><br/> IR: 3.5 [2.4–5.0]<sup>2</sup><br/> <u>More than three</u><br/> IR: 5.5 [3.6–8.3]<sup>1</sup><br/> IR: 2.9 [1.6–5.4]<sup>2</sup></p> <p><b>Past-year deployment</b><br/> <u>Yes</u><br/> IR: 7.2 [4.6–11.2]<sup>1</sup><br/> IR: 3.0 [1.4–6.3]<sup>2</sup><br/> <u>No</u><br/> IR: 5.3 [4.4–6.5]<sup>1</sup><br/> IR: 3.6 [2.8–4.6]<sup>2</sup></p> <p><b>Past-year deployment trauma</b><br/> <u>Yes</u><br/> IR: 5.3 [3.2–8.7]<sup>1</sup><br/> IR: 2.0 [0.9–4.4]<sup>2</sup><br/> <u>No</u><br/> IR: 4.6 [3.7–5.6]<sup>1</sup><br/> IR: 3.1 [2.4–4.0]<sup>2</sup></p> |
|--|--|--|--|--|--|-------------------------------------------------------------------------------------------------------------------------------------------------------------------------------------------------------------------------------------------------------------------------------------------------------------------------------------------------------------------------------------------------------------------------------------------------------------------------------------------------------------------------------------------------------------------------------------------------------------------------------------------------------------------------------------------------------------------------------------------------------------------------------------------------------------------------------------------------------------------------------------------------------------------------------------------------------------------------------------------------------------------------|

|              |         |          |                      |                   |                   |                                                                                                                                                                                                                                                                                                                                                                                                                                                                                                                                                                                                                                                                                                                                                                                                                                                                                                                                                                                                                                                                          |
|--------------|---------|----------|----------------------|-------------------|-------------------|--------------------------------------------------------------------------------------------------------------------------------------------------------------------------------------------------------------------------------------------------------------------------------------------------------------------------------------------------------------------------------------------------------------------------------------------------------------------------------------------------------------------------------------------------------------------------------------------------------------------------------------------------------------------------------------------------------------------------------------------------------------------------------------------------------------------------------------------------------------------------------------------------------------------------------------------------------------------------------------------------------------------------------------------------------------------------|
|              |         |          |                      |                   |                   | <p><b>Past-year civilian trauma</b></p> <p><u>Yes</u><br/>IR: 6.5 [5.2–8.1]<sup>1</sup><br/>IR: 4.2 [3.1–5.6]<sup>2</sup></p> <p><u>No</u><br/>IR: 2.9 [2.1–4.0]<sup>1</sup><br/>IR: 1.6 [1.0–2.5]<sup>2</sup></p> <p><b>Component</b></p> <p><u>Reserve</u><br/>IR: 4.0 [3.0–5.3]<sup>1</sup><br/>IR: 3.0 [2.1–4.2]<sup>2</sup></p> <p><u>National Guard</u><br/>IR: 5.3 [4.2–6.8]<sup>1</sup><br/>IR: 2.8 [2.0–4.0]<sup>2</sup></p> <p><b>Branch</b></p> <p><u>Air Force Reserve</u><br/>IR: 2.7 [1.3–5.6]<sup>1</sup><br/>IR: 1.1 [0.3–3.5]<sup>2</sup></p> <p><u>Army Reserve</u><br/>IR: 4.2 [2.8–6.3]<sup>1</sup><br/>IR: 4.2 [2.7–6.6]<sup>2</sup></p> <p><u>Marine Reserve</u><br/>IR: 5.3 [3.0–9.7]<sup>1</sup><br/>IR: 2.5 [1.1–5.5]<sup>2</sup></p> <p><u>Navy Reserve</u><br/>IR: 4.0 [2.2–7.2]<sup>1</sup><br/>IR: 1.9 [0.9–4.0]<sup>2</sup></p> <p><u>Air National Guard</u><br/>IR: 3.4 [1.9–6.1]<sup>1</sup><br/>IR: 0.4 [0.1–1.4]<sup>2</sup></p> <p><u>Army National Guard</u><br/>IR: 5.9 [4.5–7.7]<sup>1</sup><br/>IR: 3.6 [2.4–5.0]<sup>2</sup></p> |
| 17. Goodwin, | Name: - | n= 1,397 | Exposure assessment: | Type of symptoms: | Univariate (model | <b>Sex</b>                                                                                                                                                                                                                                                                                                                                                                                                                                                                                                                                                                                                                                                                                                                                                                                                                                                                                                                                                                                                                                                               |

|                    |                                                                                                              |                                                                                                                                                                                                                           |                                                                                                                                                                               |                                                                                                                                                  |                                                                                                                                                                                                                                                          |                                                                                                                                                                                                                                                                                                                                                                                                                                                                                                                                                                                                                                                                                                                                                                                                  |
|--------------------|--------------------------------------------------------------------------------------------------------------|---------------------------------------------------------------------------------------------------------------------------------------------------------------------------------------------------------------------------|-------------------------------------------------------------------------------------------------------------------------------------------------------------------------------|--------------------------------------------------------------------------------------------------------------------------------------------------|----------------------------------------------------------------------------------------------------------------------------------------------------------------------------------------------------------------------------------------------------------|--------------------------------------------------------------------------------------------------------------------------------------------------------------------------------------------------------------------------------------------------------------------------------------------------------------------------------------------------------------------------------------------------------------------------------------------------------------------------------------------------------------------------------------------------------------------------------------------------------------------------------------------------------------------------------------------------------------------------------------------------------------------------------------------------|
| 2012 <sup>35</sup> | <p><u>Design:</u><br/>Prospective longitudinal.</p> <p><u>Follow-up period:</u><br/>40.3 months (median)</p> | <p><u>Country</u>= UK</p> <p><u>%Female</u>= 11%</p> <p><u>Age</u>= -</p> <p><u>Type of job/company</u>=<br/>Military personnel that were and were not deployed in the Iraq war.</p> <p><u>Inclusion/exclusion</u>= -</p> | <p>Self-reported.</p> <p><u>Year of assessment:</u><br/>2004-2006.</p> <p><u>Exposure categories:</u><br/>Personal characteristics, service, rank and deployment history.</p> | <p>PTSD symptoms (delayed onset)</p> <p><u>Way of assessment:</u><br/>Self-reported using the PCL-C checklist.</p> <p><u>Incidence:</u> 3.5%</p> | <p>1) and multivariate (model 2) adjusting for service, rank, deployment characteristics, depression, anxiety/panic disorder, childhood adversity and general health, alcohol misuse, common mental disorders, and subthreshold PTSD all at phase 1.</p> | <p><b>Male</b><br/>OR: Ref.</p> <p><b>Female</b><br/>OR: 1.46 [0.64 3.36]<sup>1</sup></p> <p><b>Age</b><br/><u>≤35</u><br/>OR: Ref.<br/><u>≥35</u><br/>OR: 0.71 [0.38 1.34]<sup>1</sup></p> <p><b>Marital status</b><br/><u>In a relationship</u><br/>OR: Ref.<br/><u>Single, divorced, separated, widowed</u><br/>OR: 0.92 [0.39 2.14]<sup>1</sup></p> <p><b>Service</b><br/><u>Naval services</u><br/>OR: 0.40 [0.14 1.19]<sup>1</sup><br/>OR: 0.45 [0.16 1.28]<sup>2</sup><br/><u>Army</u><br/>OR: Ref.<br/>OR: Ref.<br/><u>Royal Air Force</u><br/>OR: 0.23 [0.07 0.81]<sup>1</sup><br/>OR: 0.53 [0.15 1.87]<sup>2</sup></p> <p><b>Rank</b><br/><u>Officer</u><br/>OR: 0.17 [0.05 0.57]<sup>1</sup><br/>OR: 0.21 [0.06 0.72]<sup>2</sup><br/><u>Other rank</u><br/>OR: Ref.<br/>OR: Ref.</p> |
|--------------------|--------------------------------------------------------------------------------------------------------------|---------------------------------------------------------------------------------------------------------------------------------------------------------------------------------------------------------------------------|-------------------------------------------------------------------------------------------------------------------------------------------------------------------------------|--------------------------------------------------------------------------------------------------------------------------------------------------|----------------------------------------------------------------------------------------------------------------------------------------------------------------------------------------------------------------------------------------------------------|--------------------------------------------------------------------------------------------------------------------------------------------------------------------------------------------------------------------------------------------------------------------------------------------------------------------------------------------------------------------------------------------------------------------------------------------------------------------------------------------------------------------------------------------------------------------------------------------------------------------------------------------------------------------------------------------------------------------------------------------------------------------------------------------------|

|  |  |  |  |  |  |                                                                                                                                                                                                                                                                                                                                                                                                                                                                                                                                                                                                                                                                                                                                                              |
|--|--|--|--|--|--|--------------------------------------------------------------------------------------------------------------------------------------------------------------------------------------------------------------------------------------------------------------------------------------------------------------------------------------------------------------------------------------------------------------------------------------------------------------------------------------------------------------------------------------------------------------------------------------------------------------------------------------------------------------------------------------------------------------------------------------------------------------|
|  |  |  |  |  |  | <p><b>Deployment</b></p> <p><u>Regular</u><br/>OR: Ref.</p> <p><u>Reservist</u><br/>OR: 0.83 [0.42 1.68]<sup>1</sup></p> <p><b>In a combat role on deployment</b></p> <p><u>No</u><br/>OR: Ref.<br/>OR: Ref.</p> <p><u>Yes</u><br/>OR: 3.00 [1.57 5.75]<sup>1</sup><br/>OR: 2.61 [1.20 5.68]<sup>2</sup></p> <p><b>Thought might be killed</b></p> <p><u>No</u><br/>OR: Ref.<br/>OR: Ref.</p> <p><u>Yes</u><br/>OR: 3.69 [1.61 8.45]<sup>1</sup><br/>OR: 2.38 [1.03 5.46]<sup>2</sup></p> <p><b>Discharged weapon on deployment</b></p> <p><u>No</u><br/>OR: Ref.</p> <p><u>Yes</u><br/>OR: 1.48 [0.61 3.60]<sup>1</sup></p> <p><b>Handled bodies on deployment</b></p> <p><u>No</u><br/>OR: Ref.</p> <p><u>Yes</u><br/>OR: 2.01 [0.93 4.35]<sup>1</sup></p> |
|--|--|--|--|--|--|--------------------------------------------------------------------------------------------------------------------------------------------------------------------------------------------------------------------------------------------------------------------------------------------------------------------------------------------------------------------------------------------------------------------------------------------------------------------------------------------------------------------------------------------------------------------------------------------------------------------------------------------------------------------------------------------------------------------------------------------------------------|

|  |  |  |  |  |  |                                                                                                                                                                                                                                                                                                                                                                                                                                                                                                                                                                                                                                                                                                                                                                                                                                                                                                 |
|--|--|--|--|--|--|-------------------------------------------------------------------------------------------------------------------------------------------------------------------------------------------------------------------------------------------------------------------------------------------------------------------------------------------------------------------------------------------------------------------------------------------------------------------------------------------------------------------------------------------------------------------------------------------------------------------------------------------------------------------------------------------------------------------------------------------------------------------------------------------------------------------------------------------------------------------------------------------------|
|  |  |  |  |  |  | <p><b>History of depression</b></p> <p><u>No</u><br/>OR: Ref.<br/>OR: Ref.</p> <p><u>Yes</u><br/>OR: 4.31 [2.19 8.49]<sup>1</sup><br/>OR: 3.67 [1.75 7.67]<sup>2</sup></p> <p><b>History of anxiety/panic disorder</b></p> <p><u>No</u><br/>OR: Ref.<br/>OR: Ref.</p> <p><u>Yes</u><br/>OR: 4.77 [1.92 11.82]<sup>1</sup><br/>OR: 2.85 [0.87 9.30]<sup>2</sup></p> <p><b>Childhood adversity, antisocial behavior</b></p> <p><u>No</u><br/>OR: Ref.<br/>OR: Ref.</p> <p><u>Yes</u><br/>OR: 3.26 [1.66 6.40]<sup>1</sup><br/>OR: 1.58 [0.73 3.43]<sup>2</sup></p> <p><b>Childhood adversity, family relationship</b></p> <p><u>0 adversities</u><br/>OR: Ref.<br/>OR: Ref.</p> <p><u>1 adversity</u><br/>OR: 1.36 [0.53 3.48]<sup>1</sup><br/>OR: 1.29 [0.46 3.63]<sup>2</sup></p> <p><u>2 or more adversities</u><br/>OR: 2.92 [1.41 6.04]<sup>1</sup><br/>OR: 2.18 [0.99 4.77]<sup>2</sup></p> |
|--|--|--|--|--|--|-------------------------------------------------------------------------------------------------------------------------------------------------------------------------------------------------------------------------------------------------------------------------------------------------------------------------------------------------------------------------------------------------------------------------------------------------------------------------------------------------------------------------------------------------------------------------------------------------------------------------------------------------------------------------------------------------------------------------------------------------------------------------------------------------------------------------------------------------------------------------------------------------|

|  |  |  |  |  |  |                                                                                                                                                                                                                                                                                                                                                                                                                                                                                                                                                                                                                                                                                                                                                                                                                      |
|--|--|--|--|--|--|----------------------------------------------------------------------------------------------------------------------------------------------------------------------------------------------------------------------------------------------------------------------------------------------------------------------------------------------------------------------------------------------------------------------------------------------------------------------------------------------------------------------------------------------------------------------------------------------------------------------------------------------------------------------------------------------------------------------------------------------------------------------------------------------------------------------|
|  |  |  |  |  |  | <p><b>General health status</b></p> <p><u>Fair/ poor</u><br/>OR: 3.05 [1.49 6.23]<sup>1</sup><br/>OR: 1.84 [0.79 4.28]<sup>2</sup></p> <p><u>Excellent/ good</u><br/>OR: Ref.<br/>OR: Ref.</p> <p><b>Common mental disorder</b></p> <p><u>Non-case</u><br/>OR: Ref.<br/>OR: Ref.</p> <p><u>Case</u><br/>OR: 5.58 [2.94 10.58]<sup>1</sup><br/>OR: 2.47 [1.12 5.46]<sup>2</sup></p> <p><b>Multiple physical symptoms</b></p> <p><u>Non-case</u><br/>OR: Ref.<br/>OR: Ref.</p> <p><u>Case</u><br/>OR: 7.32 [3.81 14.07]<sup>1</sup><br/>OR: 3.40 [1.54 7.47]<sup>2</sup></p> <p><b>Alcohol misuse</b></p> <p><u>Non-case</u><br/>OR: Ref.</p> <p><u>Case</u><br/>OR: 2.18 [1.00 4.75]<sup>1</sup></p> <p><b>Subthreshold PTSD reported at phase 1</b></p> <p><u>No</u><br/>OR: Ref.<br/>OR: Ref.</p> <p><u>Yes</u></p> |
|--|--|--|--|--|--|----------------------------------------------------------------------------------------------------------------------------------------------------------------------------------------------------------------------------------------------------------------------------------------------------------------------------------------------------------------------------------------------------------------------------------------------------------------------------------------------------------------------------------------------------------------------------------------------------------------------------------------------------------------------------------------------------------------------------------------------------------------------------------------------------------------------|



|  |  |  |  |  |  |                                                                                                                                                                                                                                                                                                                                                                                                                                                                                                                                                                                                                                                                                                                                                                                                                                                                                                                                                                                                                                         |
|--|--|--|--|--|--|-----------------------------------------------------------------------------------------------------------------------------------------------------------------------------------------------------------------------------------------------------------------------------------------------------------------------------------------------------------------------------------------------------------------------------------------------------------------------------------------------------------------------------------------------------------------------------------------------------------------------------------------------------------------------------------------------------------------------------------------------------------------------------------------------------------------------------------------------------------------------------------------------------------------------------------------------------------------------------------------------------------------------------------------|
|  |  |  |  |  |  | <p>OR: 9.96 [4.67 21.20]<sup>1</sup><br/> OR: 4.87 [2.05 11.58]<sup>2</sup></p> <p><b>Cumulative physical/psychological morbidity at phase 1</b></p> <p><u>0 reports</u><br/> OR: Ref.<br/> OR: Ref.</p> <p><u>1 report</u><br/> OR: 4.40 [1.88 10.33]<sup>1</sup><br/> OR: 3.37 [1.30 8.73]<sup>2</sup></p> <p><u>2 reports</u><br/> OR: 10.72 [4.09 28.08]<sup>1</sup><br/> OR: 6.56 [2.29 8.73]<sup>2</sup></p> <p><u>3-4 reports</u><br/> OR: 17.14 [6.84 42.97]<sup>1</sup><br/> OR: 8.14 [2.81 23.57]<sup>2</sup></p> <p><b>Relationship status</b></p> <p><u>No change</u><br/> OR: Ref.</p> <p><u>In a new relationship since phase 1</u><br/> OR: 1.17 [0.39 3.52]<sup>1</sup></p> <p><u>End of a relationship since phase 1</u><br/> OR: 2.18 [0.84 5.62]<sup>1</sup></p> <p><b>Serving status</b></p> <p><u>In service phases 1 and 2</u><br/> OR: Ref.<br/> OR: Ref.</p> <p><u>Not in service phases 1 and 2</u><br/> OR: 1.51 [0.58 3.89]<sup>1</sup><br/> OR: 1.14 [0.40 3.29]<sup>2</sup></p> <p><u>Left service</u></p> |
|--|--|--|--|--|--|-----------------------------------------------------------------------------------------------------------------------------------------------------------------------------------------------------------------------------------------------------------------------------------------------------------------------------------------------------------------------------------------------------------------------------------------------------------------------------------------------------------------------------------------------------------------------------------------------------------------------------------------------------------------------------------------------------------------------------------------------------------------------------------------------------------------------------------------------------------------------------------------------------------------------------------------------------------------------------------------------------------------------------------------|

|  |  |  |  |  |  |                                                                                                                                                                                                                                                                                                                                                                                                                                                                                                                                                                                                                                                                                                                                                                                                                                                                                                                                                                                                                                                                               |
|--|--|--|--|--|--|-------------------------------------------------------------------------------------------------------------------------------------------------------------------------------------------------------------------------------------------------------------------------------------------------------------------------------------------------------------------------------------------------------------------------------------------------------------------------------------------------------------------------------------------------------------------------------------------------------------------------------------------------------------------------------------------------------------------------------------------------------------------------------------------------------------------------------------------------------------------------------------------------------------------------------------------------------------------------------------------------------------------------------------------------------------------------------|
|  |  |  |  |  |  | <p>OR: 2.24 [1.13 4.42]<sup>1</sup><br/>OR: 1.46 [0.66 3.23]<sup>2</sup></p> <p><b>General health status</b><br/><u>Good health stable</u><br/>OR: Ref.<br/>OR: Ref.<br/><u>Poor health stable</u><br/>OR: 7.83 [3.33 18.44]<sup>1</sup><br/>OR: 3.72 [1.19 11.65]<sup>2</sup><br/><u>Decline in health since phase 1</u><br/><u>1</u><br/>OR: 6.44 [2.89 14.35]<sup>1</sup><br/>OR: 3.74 [1.41 9.91]<sup>2</sup><br/><u>Improvement in health since phase 1</u><br/>OR: 1.71 [0.47 6.24]<sup>1</sup><br/>OR: 0.88 [0.24 3.24]<sup>2</sup></p> <p><b>Alcohol misuse</b><br/><u>No change [no misuse]</u><br/>OR: Ref.<br/>OR: Ref.<br/><u>No change [misuse]</u><br/>OR: 3.84 [1.37 10.77]<sup>1</sup><br/>OR: 1.29 [0.40 4.18]<sup>2</sup><br/><u>Deterioration change since phase 1</u><br/>OR: 6.10 [2.45 15.17]<sup>1</sup><br/>OR: 6.15 [2.05 18.48]<sup>2</sup><br/><u>Improvement change since phase 1</u><br/>OR: 1.60 [0.47 5.47]<sup>1</sup><br/>OR: 0.76 [0.21 2.71]<sup>2</sup></p> <p><b>Common mental disorders</b><br/><u>No change or positive change</u></p> |
|--|--|--|--|--|--|-------------------------------------------------------------------------------------------------------------------------------------------------------------------------------------------------------------------------------------------------------------------------------------------------------------------------------------------------------------------------------------------------------------------------------------------------------------------------------------------------------------------------------------------------------------------------------------------------------------------------------------------------------------------------------------------------------------------------------------------------------------------------------------------------------------------------------------------------------------------------------------------------------------------------------------------------------------------------------------------------------------------------------------------------------------------------------|

|                       |                                                                                                                              |                                                                                                                                                                                                                                                                                                                                                                                                                |                                                                                                                                                                 |                                                                                                                                                                                                                    |            |                                                                                                                                                                                                                                                                                                                                                                                                                        |
|-----------------------|------------------------------------------------------------------------------------------------------------------------------|----------------------------------------------------------------------------------------------------------------------------------------------------------------------------------------------------------------------------------------------------------------------------------------------------------------------------------------------------------------------------------------------------------------|-----------------------------------------------------------------------------------------------------------------------------------------------------------------|--------------------------------------------------------------------------------------------------------------------------------------------------------------------------------------------------------------------|------------|------------------------------------------------------------------------------------------------------------------------------------------------------------------------------------------------------------------------------------------------------------------------------------------------------------------------------------------------------------------------------------------------------------------------|
|                       |                                                                                                                              |                                                                                                                                                                                                                                                                                                                                                                                                                |                                                                                                                                                                 |                                                                                                                                                                                                                    |            | <p>OR: Ref.<br/>OR: Ref.<br/><u>Negative change since phase 1</u><br/>OR: 6.29 [3.24 12.21]<sup>1</sup><br/>OR: 7.12 [3.07 16.52]<sup>2</sup></p> <p><b>Multiple physical symptoms</b><br/><u>No change or improvement</u><br/>OR: Ref.<br/>OR: Ref.<br/><u>Decline in health since phase 1</u><br/>OR: 9.73 [4.56 20.76]<sup>1</sup><br/>OR: 7.85 [2.86 21.52]<sup>2</sup></p>                                        |
| 18. Green, 2016<br>36 | <p><u>Name:</u> Project VALOR</p> <p><u>Design:</u><br/>Retrospective longitudinal</p> <p><u>Follow-up period:</u><br/>-</p> | <p><u>n</u>= 738</p> <p><u>Country</u>= USA</p> <p><u>%Female</u>= 51%</p> <p><u>Age</u>= 37.7 (9.9) years.</p> <p><u>Type of job/company</u>= Iraq and Afghanistan army and marine corps veterans.</p> <p><u>Inclusion/exclusion</u>= Participants who had undergone mental health evaluation at a veterans facility were included. Participants with probable PTSD and females were oversampled to get a</p> | <p><u>Exposure assessment:</u><br/>Self-reported</p> <p><u>Year of assessment:</u> -</p> <p><u>Exposure categories:</u><br/>Deployment risk and resilience.</p> | <p><u>Type of symptoms:</u><br/>PTSD</p> <p><u>Way of assessment:</u><br/>Using a structured clinical interview with DSM-4 criteria.</p> <p><u>Incidence:</u> 73% and 68% for females and males, respectively.</p> | Unadjusted | <p><b>Age</b><br/>OR: 1.01 [0.81 1.03]</p> <p><b>Race</b><br/><u>White</u><br/>OR: Ref.<br/><u>Black</u><br/>OR: 1.83 [0.76 4.41]<br/><u>Other</u><br/>OR: 0.46 [0.19 1.11]</p> <p><b>Combat experiences</b><br/>OR: 1.03 [1.00 1.07]</p> <p><b>Aftermath of battle</b><br/>OR: 1.03 [1.00 1.06]</p> <p><b>Social support</b><br/>OR: 0.96 [0.93 0.98]</p> <p><b>Length of deployment</b><br/>OR: 0.97 [0.92 1.03]</p> |

|                                |                                                                                                                                                                                                                            |                                                                                                                                                                                                                                                                    |                                                                                                                                                                                                             |                                                                                                                                                                                                                                                                                                   |                                                                                                                                         |                                                                                                                                                                                                                                                                                                                                                                                                                                                                                                                                                              |
|--------------------------------|----------------------------------------------------------------------------------------------------------------------------------------------------------------------------------------------------------------------------|--------------------------------------------------------------------------------------------------------------------------------------------------------------------------------------------------------------------------------------------------------------------|-------------------------------------------------------------------------------------------------------------------------------------------------------------------------------------------------------------|---------------------------------------------------------------------------------------------------------------------------------------------------------------------------------------------------------------------------------------------------------------------------------------------------|-----------------------------------------------------------------------------------------------------------------------------------------|--------------------------------------------------------------------------------------------------------------------------------------------------------------------------------------------------------------------------------------------------------------------------------------------------------------------------------------------------------------------------------------------------------------------------------------------------------------------------------------------------------------------------------------------------------------|
|                                |                                                                                                                                                                                                                            | good representation of these groups in the final sample. Only participants with one deployment were included.                                                                                                                                                      |                                                                                                                                                                                                             |                                                                                                                                                                                                                                                                                                   |                                                                                                                                         | <b>Deployment phase</b><br><u>Insurgency</u><br>OR: Ref.<br><u>Invasion</u><br>OR: 0.38 [0.16 0.91]<br><u>Surge</u><br>OR: 0.44 [0.21 0.93]                                                                                                                                                                                                                                                                                                                                                                                                                  |
| 19. Hansen, 2017 <sup>37</sup> | <b>Name:</b> Mental Health and Work Environment Factors in the Aftermath of the Oslo Terrorist Attack<br><br><b>Design:</b> Prospective longitudinal<br><br><b>Follow-up period:</b> 10, 22 and 34 months after the attack | <u>n</u> = 1,933<br><br><u>Country</u> = Norway<br><br><u>%Female</u> = 58%<br><br><u>Age</u> = 45.4(10.9) years<br><br><u>Type of job/company</u> = Employees of the ministries at the moment of the Oslo terrorist attack.<br><br><u>Inclusion/exclusion</u> = - | <b>Exposure assessment:</b> Deployment administration<br><br><b>Year of assessment:</b> 2011<br><br><b>Exposure categories:</b> Mental health, exposure, work, perceived safety and psychosocial variables. | <b>Type of symptoms:</b> PTS symptoms<br><br><b>Way of assessment:</b> Self-reported using a Norwegian version of the Posttraumatic Stress Disorder Checklist – Specific (PCL-C), using DSM-4 criteria.<br><br><b>Incidence:</b> 6%, 4%, and 4% during the three follow-up periods, respectively. | Unadjusted (model 1) and multivariate (model 2) with age and gender and traumatic experiences, education level and leadership position. | <b>Presence during attack</b><br><u>Not present during attack</u><br>10 months<br>OR: Ref. <sup>1</sup><br>OR: Ref. <sup>2</sup><br>22 months<br>OR: Ref. <sup>1</sup><br>OR: Ref. <sup>2</sup><br>34 months<br>OR: Ref. <sup>1</sup><br>OR: Ref. <sup>2</sup><br><br><u>Present during attack</u><br>10 months<br>OR: 8.4 [5.6 12.6] <sup>1</sup><br>OR: 9.3 [6.1 14.2] <sup>2</sup><br>22 months<br>OR: 6.9 [4.3 11.2] <sup>1</sup><br>OR: 8.9 [5.2 15.3] <sup>2</sup><br>34 months<br>OR: 8.8 [5.2 15.1] <sup>1</sup><br>OR: 10.0 [5.4 18.6] <sup>2</sup> |
| 20. Harvey, 2012 <sup>38</sup> | <b>Name:</b> -<br><br><b>Design:</b> Prospective longitudinal                                                                                                                                                              | <u>n</u> = 552 in combat group, 391 in control group<br><br><u>Country</u> = UK<br><br><u>%Female</u> = 17% in                                                                                                                                                     | <b>Exposure assessment:</b> Deployment administration<br><br><b>Year of assessment:</b> 2003                                                                                                                | <b>Type of symptoms:</b> PTSD symptoms (using a cut-off >=50)<br><br><b>Way of assessment:</b> 17-item National                                                                                                                                                                                   | Univariate (model 1) and adjusted for gender, age, rank and service (model 2).                                                          | <b>Combat status</b><br><u>Control group</u><br>Short-term<br>OR: Ref<br>OR: Ref<br>Long-term                                                                                                                                                                                                                                                                                                                                                                                                                                                                |

|                                |                                                                                                                                |                                                                                                                                                                                                                                                           |                                                                                                                                                                 |                                                                                                                                                                                                                                                                       |   |                                                                                                                                                                                                                                                                                                                                                                                                                                                                                                                                                                                            |
|--------------------------------|--------------------------------------------------------------------------------------------------------------------------------|-----------------------------------------------------------------------------------------------------------------------------------------------------------------------------------------------------------------------------------------------------------|-----------------------------------------------------------------------------------------------------------------------------------------------------------------|-----------------------------------------------------------------------------------------------------------------------------------------------------------------------------------------------------------------------------------------------------------------------|---|--------------------------------------------------------------------------------------------------------------------------------------------------------------------------------------------------------------------------------------------------------------------------------------------------------------------------------------------------------------------------------------------------------------------------------------------------------------------------------------------------------------------------------------------------------------------------------------------|
|                                | <u>Follow-up period:</u><br>16 months and 4.8 year post-deployment                                                             | combat group, 19% in control group<br><br><u>Age</u> = 39.4(7.9) in combat group, 42.0(8.9) in control group<br><br><u>Type of job/company</u> = Military personnel that were and were not deployed in the Iraq war<br><br><u>Inclusion/exclusion</u> = - | <u>Exposure categories:</u><br>Combat versus control group                                                                                                      | Centre for PTSD Checklist (PCL-C)<br><br><u>Incidence:</u> Short term: 2.2% in control group and 6.3% in the combat group. Long-term: 2.0% in the control group and 5.1 in the combat group.                                                                          |   | OR: Ref<br>OR: Ref<br><br><u>Combat group</u><br><u>Short-term</u><br>OR: 3.01 [1.36 6.64] <sup>1</sup><br>OR: 2.91 [1.34 6.31] <sup>2</sup><br><u>Long-term</u><br>OR: 2.62 [1.12 6.16] <sup>1</sup><br>OR: 2.42 [1.04 5.62] <sup>2</sup>                                                                                                                                                                                                                                                                                                                                                 |
| 21. Horesh, 2011 <sup>39</sup> | <u>Name:</u> -<br><br><u>Design:</u><br>Prospective longitudinal<br><br><u>Follow-up period:</u><br>1, 2 and 20 years post-war | <u>n</u> = 675<br><br><u>Country</u> = Israel<br><br><u>%Female</u> = -<br><br><u>Age</u> = -<br><br><u>Type of job/company</u> = War veterans from the Lebanon war<br><br><u>Inclusion/exclusion</u> = -                                                 | <u>Exposure assessment:</u><br>Self-reported<br><br><u>Year of assessment:</u><br>1983<br><br><u>Exposure categories:</u><br>Combat exposure was self-reported. | <u>Type of symptoms:</u><br>PTSD, grouped into four groups: no-PTSD, 1983 PTSD, 1984 delayed onset PTSD and 2002 delayed onset PTSD.<br><br><u>Way of assessment:</u><br>Self-reported using the PTSD inventory, using DSM-3 criteria.<br><br><u>Incidence:</u> 16.5% | - | 64.5% of the participants in the 1983 PTSD group reported extreme exposure to danger, compared to 24.5% of the no-PTSD group, 35.8% of the 2002 delayed onset PTSD group and 41.4% of the 1984 delayed onset PTSD group. Whereas 27.9% of the participants in the no-PTSD group reported extreme battles severity, 48.2% of the participants in the 1983 PTSD group reported extreme battles severity. In comparison, 39.6% of the participants in the 2002 delayed onset PTSD group and 34.5% of the participants in the 1984 delayed onset PTSD group reported extreme battles severity. |
| 22. Hourani,                   | <u>Name:</u> -                                                                                                                 | <u>n</u> = 2116                                                                                                                                                                                                                                           | <u>Exposure assessment:</u>                                                                                                                                     | <u>Type of symptoms:</u>                                                                                                                                                                                                                                              | - | Those with PTSD symptoms                                                                                                                                                                                                                                                                                                                                                                                                                                                                                                                                                                   |

|                               |                                                                                                                                                                                                                                               |                                                                                                                                                                                                                                                                               |                                                                                                                                                                                                                   |                                                                                                                                                                                                                                                                           |                                                   |                                                                                                                                                                                                                                                                                                                                                                                                                                                             |
|-------------------------------|-----------------------------------------------------------------------------------------------------------------------------------------------------------------------------------------------------------------------------------------------|-------------------------------------------------------------------------------------------------------------------------------------------------------------------------------------------------------------------------------------------------------------------------------|-------------------------------------------------------------------------------------------------------------------------------------------------------------------------------------------------------------------|---------------------------------------------------------------------------------------------------------------------------------------------------------------------------------------------------------------------------------------------------------------------------|---------------------------------------------------|-------------------------------------------------------------------------------------------------------------------------------------------------------------------------------------------------------------------------------------------------------------------------------------------------------------------------------------------------------------------------------------------------------------------------------------------------------------|
| 2012 <sup>40</sup>            | <p><u>Design:</u><br/>Prospective longitudinal</p> <p><u>Follow-up period:</u><br/>6 months</p>                                                                                                                                               | <p><u>Country</u>= USA</p> <p><u>%Female</u>= -</p> <p><u>Age</u>= -</p> <p><u>Type of job/company</u>= Marines</p> <p><u>Inclusion/exclusion</u>= Participants who transitioned from active military duty to civilian life were for a minimum of 2 months were included.</p> | <p>Self-reported</p> <p><u>Year of assessment:</u><br/>2010</p> <p><u>Exposure categories:</u><br/>Exposures like number of deployments and stress were used.</p>                                                 | <p>PTSD symptoms</p> <p><u>Way of assessment:</u><br/>Self-reported using the National Centre for PTSD Checklist (PCL-C) of the Department of Veterans Affairs – Civilian Version.</p> <p><u>Incidence:</u> Baseline prevalence 28%, follow-up incidence 10%</p>          |                                                   | <p>also were more likely to report a previous trauma during their lifetime at baseline. High combat exposure scale scores were associated with PTSD. Baseline social support was associated with PTSD.</p>                                                                                                                                                                                                                                                  |
| 23. Ikeda, 2017 <sup>41</sup> | <p><u>Name:</u> Fukushima Nuclear Energy Worker's Support (NEWS) Project.</p> <p><u>Design:</u><br/>Prospective longitudinal</p> <p><u>Follow-up period:</u><br/>Baseline at 2-3 months post-disaster, with follow-up 3 years after that.</p> | <p><u>n</u>= 1,417</p> <p><u>Country</u>= Japan</p> <p><u>%Female</u>= 5%</p> <p><u>Age</u>= 39.3 years</p> <p><u>Type of job/company</u>= Employers of the Tokyo Electric Power Company in Fukushima.</p> <p><u>Inclusion/exclusion</u>= -</p>                               | <p><u>Exposure assessment:</u><br/>Self-reported</p> <p><u>Year of assessment:</u><br/>2011</p> <p><u>Exposure categories:</u><br/>Sociodemographic, disaster-related experiences and psychological distress.</p> | <p><u>Type of symptoms:</u><br/>PTSD symptoms (using a cut-off <math>\geq 25</math>)</p> <p><u>Way of assessment:</u><br/>Self-reported using the Japanese version of the Impact of Event Scale-Revisited (IES-R), using DSM-4 criteria.</p> <p><u>Incidence:</u> 26%</p> | <p>Adjusted for age, gender and job location.</p> | <p><b>Experience of life-threatening danger</b></p> <p><u>No</u><br/>OR: Ref. (2011)<br/>OR: Ref. (2012)<br/>OR: Ref. (2013)<br/>OR: Ref. (2014)</p> <p><u>Yes</u><br/>OR: 4.32 [2.89 6.48] (2011)<br/>OR: 3.47 [2.43 4.95] (2012)<br/>OR: 2.78 [1.87 4.14] (2013)<br/>OR: 2.23 [1.34 3.72] (2014)</p> <p><b>Major property loss</b></p> <p><u>No</u><br/>OR: Ref. (2011)<br/>OR: Ref. (2012)<br/>OR: Ref. (2013)<br/>OR: Ref. (2014)</p> <p><u>Yes</u></p> |

|  |  |  |  |  |  |                                                                                                                                                                                                                                                                                                                                                                                                                                                                                                                                                                                                                                                                                                                                                                                                                                                                                               |
|--|--|--|--|--|--|-----------------------------------------------------------------------------------------------------------------------------------------------------------------------------------------------------------------------------------------------------------------------------------------------------------------------------------------------------------------------------------------------------------------------------------------------------------------------------------------------------------------------------------------------------------------------------------------------------------------------------------------------------------------------------------------------------------------------------------------------------------------------------------------------------------------------------------------------------------------------------------------------|
|  |  |  |  |  |  | <p>OR: 3.45 [2.28 5.23] (2011)<br/> OR: 2.55 [1.77 3.66] (2012)<br/> OR: 1.88 [1.25 2.84] (2013)<br/> OR: 1.39 [0.81 2.37] (2014)</p> <p><b>Discrimination/slurs</b><br/> <u>No</u><br/> OR: Ref. (2011)<br/> OR: Ref. (2012)<br/> OR: Ref. (2013)<br/> OR: Ref. (2014)<br/> <u>Yes</u><br/> OR: 5.72 [3.37 9.71] (2011)<br/> OR: 4.47 [2.83 7.08] (2012)<br/> OR: 3.50 [2.10 5.84] (2013)<br/> OR: 2.74 [1.42 5.30] (2014)</p> <p><b>Escape from tsunami</b><br/> <u>No</u><br/> OR: Ref. (2011)<br/> OR: Ref. (2012)<br/> OR: Ref. (2013)<br/> OR: Ref. (2014)<br/> <u>Yes</u><br/> OR: 5.65 [3.27 9.74] (2011)<br/> OR: 3.72 [2.30 6.02] (2012)<br/> OR: 2.45 [1.40 4.27] (2013)<br/> OR: 1.61 [0.78 3.35] (2014)</p> <p><b>Witnessing of plant explosions</b><br/> <u>No</u><br/> OR: Ref. (2011)<br/> <u>Yes</u><br/> OR: 2.09 [1.43 3.06] (2011)</p> <p><b>Family member deaths</b></p> |
|--|--|--|--|--|--|-----------------------------------------------------------------------------------------------------------------------------------------------------------------------------------------------------------------------------------------------------------------------------------------------------------------------------------------------------------------------------------------------------------------------------------------------------------------------------------------------------------------------------------------------------------------------------------------------------------------------------------------------------------------------------------------------------------------------------------------------------------------------------------------------------------------------------------------------------------------------------------------------|

|                                |                                                                                                                  |                                                                                                                                                                                                  |                                                                                                                                                                                 |                                                                                                                                                                                                                                                                                              |                                                                             |                                                                                                                                                                                                                                                                                                                                                                                                                                                                                               |
|--------------------------------|------------------------------------------------------------------------------------------------------------------|--------------------------------------------------------------------------------------------------------------------------------------------------------------------------------------------------|---------------------------------------------------------------------------------------------------------------------------------------------------------------------------------|----------------------------------------------------------------------------------------------------------------------------------------------------------------------------------------------------------------------------------------------------------------------------------------------|-----------------------------------------------------------------------------|-----------------------------------------------------------------------------------------------------------------------------------------------------------------------------------------------------------------------------------------------------------------------------------------------------------------------------------------------------------------------------------------------------------------------------------------------------------------------------------------------|
|                                |                                                                                                                  |                                                                                                                                                                                                  |                                                                                                                                                                                 |                                                                                                                                                                                                                                                                                              |                                                                             | <p><u>No</u><br/>OR: Ref. (2011)</p> <p><u>Yes</u><br/>OR: 1.60 [0.80 3.19] (2011)</p> <p><b>Colleague deaths</b></p> <p><u>No</u><br/>OR: Ref. (2011)</p> <p><u>Yes</u><br/>OR: 2.08 [1.33 3.26] (2011)</p> <p><b>Home evacuation</b></p> <p><u>No</u><br/>OR: Ref. (2011)</p> <p><u>Yes</u><br/>OR: 1.49 [1.03 2.15] (2011)</p>                                                                                                                                                             |
| 24. Joseph, 2014 <sup>42</sup> | <p><u>Name:</u> -</p> <p><u>Design:</u><br/>Retrospective longitudinal</p> <p><u>Follow-up period:</u><br/>-</p> | <p><u>n</u>= 453</p> <p><u>Country</u>= USA</p> <p><u>%Female</u>= 24%</p> <p><u>Age</u>= -</p> <p><u>Type of job/company</u>=<br/>Traumatic surgeons</p> <p><u>Inclusion/exclusion</u> = --</p> | <p><u>Exposure assessment:</u><br/>Self-reported</p> <p><u>Year of assessment:</u> -</p> <p><u>Exposure categories:</u><br/>Personal characteristics, and exposure at work.</p> | <p><u>Type of symptoms:</u><br/>PTSD (symptoms and diagnosed PTSD - only diagnosed PTSD was extracted for this review)</p> <p><u>Way of assessment:</u><br/>Self-reported using the PCL checklist (with a cut-off score <math>\geq 44</math>).</p> <p><u>Incidence:</u> 15% (prevalence)</p> | <p>Univariate (model 1) and adjusting for all other exposure (model 2).</p> | <p><b>Age</b></p> <p><u>&lt;51 years</u><br/>OR: Ref.<sup>1</sup><br/>OR: Ref.<sup>2</sup></p> <p><u><math>\geq 51</math> years</u><br/>OR: 1.8 [0.7 3.4]<sup>1</sup></p> <p><b>Gender</b></p> <p><u>Female</u><br/>OR: Ref.<sup>1</sup><br/>OR: Ref.<sup>2</sup></p> <p><u>Male</u><br/>OR: 2.1 [1.4 4.6]<sup>1</sup><br/>OR: 1.8 [0.9 5.3]<sup>2</sup></p> <p><b>Marital status</b></p> <p><u>Other</u><br/>OR: Ref.<sup>1</sup></p> <p><u>Single</u><br/>OR: 1.2 [0.4 2.8]<sup>1</sup></p> |



|  |  |  |  |  |  |                                                                                                                                                                                                                                                                                                                                                                                                                                                                                                                                                                                                                                                                                                                                                                                                                                      |
|--|--|--|--|--|--|--------------------------------------------------------------------------------------------------------------------------------------------------------------------------------------------------------------------------------------------------------------------------------------------------------------------------------------------------------------------------------------------------------------------------------------------------------------------------------------------------------------------------------------------------------------------------------------------------------------------------------------------------------------------------------------------------------------------------------------------------------------------------------------------------------------------------------------|
|  |  |  |  |  |  | <p><b>Race</b></p> <p><u>Other</u><br/>OR: Ref.<sup>1</sup></p> <p><u>White</u><br/>OR: 1.1 [0.8 2.6]<sup>1</sup></p> <p><b>Comorbidities</b></p> <p><u>No</u><br/>OR: Ref.<sup>1</sup></p> <p><u>Yes</u><br/>OR: 2.4 [0.6 4.1]<sup>1</sup></p> <p><b>Urban hospital</b></p> <p><u>No</u><br/>OR: Ref.<sup>1</sup></p> <p><u>Yes</u><br/>OR: 1.6 [0.5 2.4]<sup>1</sup></p> <p><b>Academic facility</b></p> <p><u>No</u><br/>OR: Ref.<sup>1</sup></p> <p><u>Yes</u><br/>OR: 3.6 [0.9 7.8]<sup>1</sup></p> <p><b>24-h resident coverage</b></p> <p><u>No</u><br/>OR: Ref.<sup>1</sup><br/>OR: Ref.<sup>2</sup></p> <p><u>Yes</u><br/>OR: 1.8 [1.1 3.2]<sup>1</sup><br/>OR: 1.4 [0.8 4.2]<sup>2</sup></p> <p><b>≥5 critical cases per call</b></p> <p><u>No</u><br/>OR: Ref.<sup>1</sup><br/>OR: Ref.<sup>2</sup></p> <p><u>Yes</u></p> |
|--|--|--|--|--|--|--------------------------------------------------------------------------------------------------------------------------------------------------------------------------------------------------------------------------------------------------------------------------------------------------------------------------------------------------------------------------------------------------------------------------------------------------------------------------------------------------------------------------------------------------------------------------------------------------------------------------------------------------------------------------------------------------------------------------------------------------------------------------------------------------------------------------------------|

|  |  |  |  |  |  |                                                                                                                                                                                                                                                                                                                                                                                                                                                                                                                                                                                                                                                                                                                                                                                                                                                                                                         |
|--|--|--|--|--|--|---------------------------------------------------------------------------------------------------------------------------------------------------------------------------------------------------------------------------------------------------------------------------------------------------------------------------------------------------------------------------------------------------------------------------------------------------------------------------------------------------------------------------------------------------------------------------------------------------------------------------------------------------------------------------------------------------------------------------------------------------------------------------------------------------------------------------------------------------------------------------------------------------------|
|  |  |  |  |  |  | <p>OR: 2.4 [1.6 9.4]<sup>1</sup><br/>OR: 7 [1.1 8]<sup>2</sup></p> <p><b>≥7 call duties a month</b></p> <p><u>No</u><br/>OR: Ref.<sup>1</sup><br/>OR: Ref.<sup>2</sup></p> <p><u>Yes</u><br/>OR: 4.6 [2.1 14.6]<sup>1</sup><br/>OR: 3.8 [0.9 7.2]<sup>2</sup></p> <p><b>≥15 operative cases per month</b></p> <p><u>No</u><br/>OR: Ref.<sup>1</sup><br/>OR: Ref.<sup>2</sup></p> <p><u>Yes</u><br/>OR: 3.1 [1.1 7.2]<sup>1</sup><br/>OR: 2.8 [0.4 3.2]<sup>2</sup></p> <p><b>≥4-h relaxation per day</b></p> <p><u>No</u><br/>OR: Ref.<sup>1</sup><br/>OR: Ref.<sup>2</sup></p> <p><u>Yes</u><br/>OR: 4.6 [1.8 11.5]<sup>1</sup><br/>OR: 3.1 [0.9 6.7]<sup>2</sup></p> <p><b>≥2-wk vacation per year</b></p> <p><u>No</u><br/>OR: Ref.<sup>1</sup><br/>OR: Ref.<sup>2</sup></p> <p><u>Yes</u><br/>OR: 1.1 [0.9 6.8]<sup>1</sup><br/>OR: 1.4 [0.6 4.1]<sup>2</sup></p> <p><b>Military experience</b></p> |
|--|--|--|--|--|--|---------------------------------------------------------------------------------------------------------------------------------------------------------------------------------------------------------------------------------------------------------------------------------------------------------------------------------------------------------------------------------------------------------------------------------------------------------------------------------------------------------------------------------------------------------------------------------------------------------------------------------------------------------------------------------------------------------------------------------------------------------------------------------------------------------------------------------------------------------------------------------------------------------|

|                                  |                                                                          |                                                                               |                                                                                                 |                                                                                                   |   |                                                                                                                                                                                                                                                                                                                                                                                                                                                                                                                                                                                                                                                                                                                                 |
|----------------------------------|--------------------------------------------------------------------------|-------------------------------------------------------------------------------|-------------------------------------------------------------------------------------------------|---------------------------------------------------------------------------------------------------|---|---------------------------------------------------------------------------------------------------------------------------------------------------------------------------------------------------------------------------------------------------------------------------------------------------------------------------------------------------------------------------------------------------------------------------------------------------------------------------------------------------------------------------------------------------------------------------------------------------------------------------------------------------------------------------------------------------------------------------------|
|                                  |                                                                          |                                                                               |                                                                                                 |                                                                                                   |   | <p><u>No</u><br/>OR: Ref.<sup>1</sup><br/>OR: Ref.<sup>2</sup></p> <p><u>Yes</u><br/>OR: 1.4 [0.8 5.6]<sup>1</sup><br/>OR: 1.1 [0.7 3.8]<sup>2</sup></p> <p><b>War deployment</b></p> <p><u>No</u><br/>OR: Ref.<sup>1</sup><br/>OR: Ref.<sup>2</sup></p> <p><u>Yes</u><br/>OR: 4.2 [2.8 14.1]<sup>1</sup><br/>OR: 2.8 [0.9 7.9]<sup>2</sup></p> <p><b>Smoking</b></p> <p><u>No</u><br/>OR: Ref.<sup>1</sup></p> <p><u>Yes</u><br/>OR: 1.2 [0.8 3.1]<sup>1</sup></p> <p><b>Alcohol</b></p> <p><u>No</u><br/>OR: Ref.<sup>1</sup></p> <p><u>Yes</u><br/>OR: 1.1 [0.5 2.3]<sup>1</sup></p> <p><b>Annual income &gt;\$300,000</b></p> <p><u>No</u><br/>OR: Ref.<sup>1</sup></p> <p><u>Yes</u><br/>OR: 3.6 [0.9 8.4]<sup>1</sup></p> |
| 25. Karstoft, 2013 <sup>43</sup> | <p><u>Name:</u> -</p> <p><u>Design:</u><br/>Prospective longitudinal</p> | n= 675 (369 who were diagnosed with a combat stress reaction and 306 without) | <p><u>Exposure assessment:</u><br/>Self-reported</p> <p><u>Year of assessment:</u><br/>1983</p> | <p><u>Type of symptoms:</u><br/>PTSD</p> <p><u>Way of assessment:</u><br/>Self-reported using</p> | - | <p><b>Severity of battles</b><br/>OR: 0.96 [0.63 1.48] (combat stress reaction)<br/>OR: 0.87 [0.55 1.36] (no combat stress reaction)</p>                                                                                                                                                                                                                                                                                                                                                                                                                                                                                                                                                                                        |

|                                  |                                                                                                                                          |                                                                                                                                                                                                                                                                                                                   |                                                                                                                                                                                                                               |                                                                                                                                                                                                                                                                                                                                                 |                                                                                                                                                                                                                                                                                                                                                                                                                                                                        |
|----------------------------------|------------------------------------------------------------------------------------------------------------------------------------------|-------------------------------------------------------------------------------------------------------------------------------------------------------------------------------------------------------------------------------------------------------------------------------------------------------------------|-------------------------------------------------------------------------------------------------------------------------------------------------------------------------------------------------------------------------------|-------------------------------------------------------------------------------------------------------------------------------------------------------------------------------------------------------------------------------------------------------------------------------------------------------------------------------------------------|------------------------------------------------------------------------------------------------------------------------------------------------------------------------------------------------------------------------------------------------------------------------------------------------------------------------------------------------------------------------------------------------------------------------------------------------------------------------|
|                                  | <p><u>Follow-up period:</u><br/>1, 2 and 20 years post-war.</p>                                                                          | <p><u>Country</u>= Israel</p> <p><u>%Female</u>= 0%</p> <p><u>Age</u>= 25.8(4.7)</p> <p><u>Type of job/company</u>=<br/>Combat veterans who were on active duty in the Lebanon war.</p> <p><u>Inclusion/exclusion</u>= -</p>                                                                                      | <p><u>Exposure categories:</u><br/>Exposures such as the severity of battles, life threatening war, unit atmosphere and social support were assessed.</p>                                                                     | <p>the PTSD inventory, using DSM-3 criteria. Latent growth modelling was used to identify PTSD subgroups. For the current review we only assessed the 'delayed onset' PTSD group, as this reflects incidence of PTSD.</p> <p><u>Incidence:</u> -</p>                                                                                            | <p><b>Life threatening war</b><br/>OR: 1.90 [1.08 3.35] (combat stress reaction)<br/>OR: 0.95 [0.64 1.43] (no combat stress reaction)</p> <p><b>Unit atmosphere</b><br/>OR: 1.08 [1.00 1.17] (combat stress reaction)<br/>OR: 1.02 [0.96 1.09] (no combat stress reaction)</p> <p><b>Social support</b><br/>OR: 0.58 [0.25 1.31] (combat stress reaction)<br/>OR: 0.66 [0.29 1.53] (no combat stress reaction)</p>                                                     |
| 26. Karstoft, 2015 <sup>44</sup> | <p><u>Name:</u> -</p> <p><u>Design:</u><br/>Prospective longitudinal</p> <p><u>Follow-up period:</u><br/>1, 2 and 20 years post-war.</p> | <p>n= 675 (369 who were diagnosed with a combat stress reaction and 306 without)</p> <p><u>Country</u>= Israel</p> <p><u>%Female</u>= 0%</p> <p><u>Age</u>= 25.8(4.7)</p> <p><u>Type of job/company</u>=<br/>Combat veterans who were on active duty in the Lebanon war.</p> <p><u>Inclusion/exclusion</u>= -</p> | <p><u>Exposure assessment:</u><br/>Self-reported</p> <p><u>Year of assessment:</u><br/>1983</p> <p><u>Exposure categories:</u><br/>Exposures such as the severity of battles, life threatening war, coping were assessed.</p> | <p><u>Type of symptoms:</u><br/>PTSD</p> <p><u>Way of assessment:</u><br/>Self-reported using the PTSD inventory, using DSM-3 criteria. Latent growth modelling was used to identify PTSD subgroups. For the current review we only assessed the 'delayed onset' PTSD group, as this reflects incidence of PTSD.</p> <p><u>Incidence:</u> -</p> | <p>-</p> <p><b>Severity of battles</b><br/>OR: 1.01 [0.67 1.35] (combat stress reaction)<br/>OR: 0.87 [0.57 1.32] (no combat stress reaction)</p> <p><b>Life threatening war</b><br/>OR: 1.91 [1.07 3.24] (combat stress reaction)<br/>OR: 1.01 [0.68 1.50] (no combat stress reaction)</p> <p><b>Locus of control</b><br/>OR: 1.12 [0.93 1.35] (combat stress reaction)<br/>OR: 0.88 [0.73 1.05] (no combat stress reaction)</p> <p><b>Problem-focused coping</b></p> |

|                             |                                                                                                                  |                                                                                                                                                                                                                                                                                                                                       |                                                                                                                                                                                                                |                                                                                                                                                                                                                                                                                                              |                                                                                                                                    |                                                                                                                                                                                                                                                                                                                                                                                                                                                                                                                                                                                                                     |
|-----------------------------|------------------------------------------------------------------------------------------------------------------|---------------------------------------------------------------------------------------------------------------------------------------------------------------------------------------------------------------------------------------------------------------------------------------------------------------------------------------|----------------------------------------------------------------------------------------------------------------------------------------------------------------------------------------------------------------|--------------------------------------------------------------------------------------------------------------------------------------------------------------------------------------------------------------------------------------------------------------------------------------------------------------|------------------------------------------------------------------------------------------------------------------------------------|---------------------------------------------------------------------------------------------------------------------------------------------------------------------------------------------------------------------------------------------------------------------------------------------------------------------------------------------------------------------------------------------------------------------------------------------------------------------------------------------------------------------------------------------------------------------------------------------------------------------|
|                             |                                                                                                                  |                                                                                                                                                                                                                                                                                                                                       |                                                                                                                                                                                                                |                                                                                                                                                                                                                                                                                                              |                                                                                                                                    | <p>OR: 1.72 [0.80 3.73] (combat stress reaction)<br/> OR: 3.11 [1.16 8.38] (no combat stress reaction)</p> <p><b>Emotion-focused coping</b><br/> OR: 0.60 [0.26–1.35] (combat stress reaction)<br/> OR: 0.28 [0.09–0.93] (no combat stress reaction)</p>                                                                                                                                                                                                                                                                                                                                                            |
| 27. Kim, 2014 <sup>45</sup> | <p><u>Name:</u> -</p> <p><u>Design:</u><br/>Retrospective longitudinal</p> <p><u>Follow-up period:</u><br/>-</p> | <p><u>n</u>= 980</p> <p><u>Country</u>= Korea</p> <p><u>%Female</u>= 0%</p> <p><u>Age</u>= Most participants were in their 40s.</p> <p><u>Type of job/company</u>= Subway drivers employed by a public company in Seoul</p> <p><u>Inclusion/exclusion</u>= Participants currently on sick leave and female drivers were excluded.</p> | <p><u>Exposure assessment:</u><br/>Self-reported</p> <p><u>Year of assessment:</u> -</p> <p><u>Exposure categories:</u><br/>Person under train experiences and other work-related exposures were assessed.</p> | <p><u>Type of symptoms:</u><br/>PTSD (1 year and lifetime prevalence).</p> <p><u>Way of assessment:</u><br/>The Korean version of the Composite International Diagnostic Interview (K-CIDI) was administered to diagnose PTSD, using DSM-4 criteria.</p> <p><u>Incidence:</u> 1.6% (one year prevalence)</p> | <p>Multi-variate analyses with all other exposures and age. For 1 year prevalence (model 1) and lifetime prevalence (model 2).</p> | <p><b>Person under train experience</b></p> <p><u>No</u><br/>OR: Ref</p> <p><u>Yes</u><br/>OR: 1.54 [0.52 4.55]<sup>1</sup><br/>OR: 2.06 [0.94 4.55]<sup>2</sup></p> <p><b>Number of person under train experiences</b></p> <p><u>0 experiences</u><br/>OR: Ref</p> <p><u>1 experience</u><br/>OR: 1.77 [0.31 4.47]<sup>1</sup><br/>OR: 1.45 [0.55 3.85]<sup>2</sup></p> <p><u>≥2 experiences</u><br/>OR: 2.36 [0.57 9.70]<sup>1</sup><br/>OR: 3.57 [1.32 3.65]<sup>2</sup></p> <p><b>Severity of victim's injury</b></p> <p><u>Alive</u><br/>OR: Ref</p> <p><u>Death</u><br/>OR: 2.49 [0.27 23.27]<sup>1</sup></p> |

|  |  |  |  |  |  |                                                                                                                                                                                                                                                                                                                                                                                                                                                                                                                                                                                                                                                                                                                                                                                                                                                                                                                                                                                                           |
|--|--|--|--|--|--|-----------------------------------------------------------------------------------------------------------------------------------------------------------------------------------------------------------------------------------------------------------------------------------------------------------------------------------------------------------------------------------------------------------------------------------------------------------------------------------------------------------------------------------------------------------------------------------------------------------------------------------------------------------------------------------------------------------------------------------------------------------------------------------------------------------------------------------------------------------------------------------------------------------------------------------------------------------------------------------------------------------|
|  |  |  |  |  |  | <p>OR: 1.39 [0.40 4.82]<sup>2</sup></p> <p><b>Person under train experience</b></p> <p><u>&gt;5 years ago</u></p> <p>OR: Ref</p> <p>OR: Ref</p> <p><u>≤5 years</u></p> <p>OR: 1.01 [0.11 9.06]<sup>1</sup></p> <p>OR: 0.33 [0.03 2.63]<sup>2</sup></p> <p><b>Conflict with passengers</b></p> <p><u>No</u></p> <p>OR: Ref.<sup>1</sup></p> <p>OR: Ref.<sup>2</sup></p> <p><u>Yes</u></p> <p>OR: 3.21 [1.14 9.03]<sup>1</sup></p> <p>OR: 3.32 [1.55 7.12]<sup>2</sup></p> <p><b>Sudden stop</b></p> <p><u>No</u></p> <p>OR: Ref.<sup>1</sup></p> <p>OR: Ref.<sup>2</sup></p> <p><u>Yes</u></p> <p>OR: 3.66 [0.82 16.4]<sup>1</sup></p> <p>OR: 7.53 [1.77 32.02]<sup>2</sup></p> <p><b>Near accident</b></p> <p><u>No</u></p> <p>OR: Ref.<sup>1</sup></p> <p>OR: Ref.<sup>2</sup></p> <p><u>Yes</u></p> <p>OR: 8.81 [1.96 39.3]<sup>1</sup></p> <p>OR: 6.36 [2.40 16.90]<sup>2</sup></p> <p><b>Breakdown</b></p> <p><u>No</u></p> <p>OR: Ref.<sup>1</sup></p> <p>OR: Ref.<sup>2</sup></p> <p><u>Yes</u></p> |
|--|--|--|--|--|--|-----------------------------------------------------------------------------------------------------------------------------------------------------------------------------------------------------------------------------------------------------------------------------------------------------------------------------------------------------------------------------------------------------------------------------------------------------------------------------------------------------------------------------------------------------------------------------------------------------------------------------------------------------------------------------------------------------------------------------------------------------------------------------------------------------------------------------------------------------------------------------------------------------------------------------------------------------------------------------------------------------------|

|                                      |                                                                                                                                                                                                                                                                              |                                                                                                                                                                                                                                                                                                                                           |                                                                                                                                                                               |                                                                                                                                                                           |                                        |                                                                                                                                                                                                                                                                                                                                                                                                                                                                                                                                                                                                                                         |
|--------------------------------------|------------------------------------------------------------------------------------------------------------------------------------------------------------------------------------------------------------------------------------------------------------------------------|-------------------------------------------------------------------------------------------------------------------------------------------------------------------------------------------------------------------------------------------------------------------------------------------------------------------------------------------|-------------------------------------------------------------------------------------------------------------------------------------------------------------------------------|---------------------------------------------------------------------------------------------------------------------------------------------------------------------------|----------------------------------------|-----------------------------------------------------------------------------------------------------------------------------------------------------------------------------------------------------------------------------------------------------------------------------------------------------------------------------------------------------------------------------------------------------------------------------------------------------------------------------------------------------------------------------------------------------------------------------------------------------------------------------------------|
|                                      |                                                                                                                                                                                                                                                                              |                                                                                                                                                                                                                                                                                                                                           |                                                                                                                                                                               |                                                                                                                                                                           |                                        | OR: 1.71 [0.48 6.14] <sup>1</sup><br>OR: 1.89 [0.75 4.75] <sup>2</sup><br><b>Person under train experience of colleague</b><br><u>No</u><br>OR: Ref. <sup>1</sup><br>OR: Ref. <sup>2</sup><br><u>Yes</u><br>OR: 0.55 [0.12 2.47] <sup>2</sup><br>OR: 2.84 [1.32 6.12] <sup>2</sup>                                                                                                                                                                                                                                                                                                                                                      |
| 28. Levin-Rector, 2018 <sup>46</sup> | <p><b>Name:</b> Defence Manpower Data Center (DMDC), Career History and Archival Medical Personnel System (CHAMPS), and the Expeditionary Medical Encounter Database (EMED)</p> <p><b>Design:</b> Prospective longitudinal</p> <p><b>Follow-up period:</b> 35-43 months.</p> | <p>n= 332,093 (marine) and 773,359 (army)</p> <p><u>Country</u>= USA</p> <p><u>%Female</u>= 7% (marine) and 17% (army)</p> <p><u>Age</u>= 20.0 (3.9) (marine) and 21.7 (2.1) (army)</p> <p><u>Type of job/company</u>= All service members who went into the army or navy between 2001 and 2011.</p> <p><u>Inclusion/exclusion</u>= -</p> | <p><b>Exposure assessment:</b> Military databases</p> <p><u>Year of assessment:</u> 2001-2011</p> <p><b>Exposure categories:</b> Personal and deployment characteristics.</p> | <p><b>Type of symptoms:</b> PTSD</p> <p><u>Way of assessment:</u> Diagnosed PTSD obtained from military records.</p> <p><u>Incidence:</u> 4.3% (marine); 7.6% (army).</p> | Adjusting for clustering within units. | <p><b>Sex</b></p> <p><u>Female</u><br/>HR: Ref. (marine)<br/>HR: Ref. (army)</p> <p><u>Male</u><br/>HR: 0.40 [0.36 0.44] (marine)<br/>HR: 0.57 [0.55 0.59] (army)</p> <p><b>Age at accession</b><br/>HR: 0.99 [0.98 1.00] (marine)<br/>HR: 1.01 [1.00 1.01] (army)</p> <p><b>Race</b></p> <p><u>White</u><br/>HR: Ref. (marine)<br/>HR: Ref. (army)</p> <p><u>Non-white</u><br/>HR: 0.95 [0.91 1.00] (marine)<br/>HR: 0.96 [0.94 0.98] (army)</p> <p><b>Ethnicity</b></p> <p><u>Non-Hispanic</u><br/>HR: Ref. (marine)<br/>HR: Ref. (army)</p> <p><u>Hispanic</u><br/>HR: 0.80 [0.75 0.84] (marine)<br/>HR: 0.86 [0.84 0.89] (army)</p> |

|  |  |  |  |  |  |                                                                                                                                                                                                                                                                                                                                                                                                                                                                                                                                                                                                                                                                                                                                                                                                                                                                                                                                  |
|--|--|--|--|--|--|----------------------------------------------------------------------------------------------------------------------------------------------------------------------------------------------------------------------------------------------------------------------------------------------------------------------------------------------------------------------------------------------------------------------------------------------------------------------------------------------------------------------------------------------------------------------------------------------------------------------------------------------------------------------------------------------------------------------------------------------------------------------------------------------------------------------------------------------------------------------------------------------------------------------------------|
|  |  |  |  |  |  | <p><b>Prior substance abuse disorder diagnosis</b><br/> HR: 3.10 [2.92 3.30] (marine)<br/> HR: 2.05 [2.00 2.10] (army)</p> <p><b>Waiver status</b><br/> <u>No waiver</u><br/> HR: Ref. (marine)<br/> HR: Ref. (army)<br/> <u>Received medical waiver</u><br/> HR: 1.13 [1.07 1.20] (marine)<br/> HR: 1.02 [0.99 1.05] (army)<br/> <u>Received other waiver</u><br/> HR: 1.12 [1.08 1.16] (marine)<br/> HR: 1.12 [1.10 1.15] (army)</p> <p><b>Marital status</b><br/> <u>Single</u><br/> HR: Ref. (marine)<br/> HR: Ref. (army)<br/> <u>Divorced/widowed</u><br/> HR: 1.21 [1.06 1.39] (marine)<br/> HR: 1.18 [1.12 1.24] (army)<br/> <u>Married</u><br/> HR: 1.31 [1.24 1.38] (marine)<br/> HR: 1.20 [1.18 1.23] (army)</p> <p><b>Rank</b><br/> <u>Enlisted</u><br/> HR: Ref. (marine)<br/> HR: Ref. (army)<br/> <u>Officer</u><br/> HR: 0.16 [0.13 0.21] (marine)<br/> HR: 0.20 [0.15 0.26] (army)</p> <p><b>Occupation</b></p> |
|--|--|--|--|--|--|----------------------------------------------------------------------------------------------------------------------------------------------------------------------------------------------------------------------------------------------------------------------------------------------------------------------------------------------------------------------------------------------------------------------------------------------------------------------------------------------------------------------------------------------------------------------------------------------------------------------------------------------------------------------------------------------------------------------------------------------------------------------------------------------------------------------------------------------------------------------------------------------------------------------------------|



|                                   |                                                                                           |                                                                                                            |                                                                                               |                                                                                                                  |                                                                                              |                                                                                                                                                                                                                                                                                                                                                                                                                                                                                                                                                                                                                                                                                                                                                                                                                                                                                                                              |
|-----------------------------------|-------------------------------------------------------------------------------------------|------------------------------------------------------------------------------------------------------------|-----------------------------------------------------------------------------------------------|------------------------------------------------------------------------------------------------------------------|----------------------------------------------------------------------------------------------|------------------------------------------------------------------------------------------------------------------------------------------------------------------------------------------------------------------------------------------------------------------------------------------------------------------------------------------------------------------------------------------------------------------------------------------------------------------------------------------------------------------------------------------------------------------------------------------------------------------------------------------------------------------------------------------------------------------------------------------------------------------------------------------------------------------------------------------------------------------------------------------------------------------------------|
|                                   |                                                                                           |                                                                                                            |                                                                                               |                                                                                                                  |                                                                                              | <p><u>Combat specialist</u><br/>HR: Ref. (marine)<br/>HR: Ref. (army)</p> <p><u>Communications/intelligence</u><br/>HR: 0.54 [0.48 0.62] (marine)<br/>HR: 0.73 [0.70 0.77] (army)</p> <p><u>Craft/repair specialist</u><br/>HR: 0.46 [0.40 0.54] (marine)<br/>HR: 0.62 [0.60 0.65] (army)</p> <p><u>Functional support/other</u><br/>HR: 0.46 [0.41 0.51] (marine)<br/>HR: 0.56 [0.53 0.59] (army)</p> <p><u>Service and supply</u><br/>HR: 0.77 [0.68 0.87] (marine)<br/>HR: 0.84 [0.80 0.88] (army)</p> <p><u>Healthcare specialist</u><br/>HR: 1.03 [0.98 1.08] (army)</p> <p><b>Cumulative years deployed</b><br/>HR: 2.04 [1.93 2.15] (marine)<br/>HR: 1.74 [1.71 1.76] (army)</p> <p><b>Unit cumulative high deployment stress rate (per 100)</b><br/>HR: 1.04 [1.03 1.05] (marine)<br/>HR: 1.05 [1.04 1.06] (army)</p> <p><b>Unit stability</b><br/>HR: 1.11 [0.92 1.33] (marine)<br/>HR: 0.69 [0.64 0.74] (army)</p> |
| 29. MacGregor, 2015 <sup>47</sup> | <p><u>Name:</u> Defence Manpower Data Center (DMDC)</p> <p><u>Design:</u> Prospective</p> | <p>n= 8,064 (3,416 health care profession, 4,648 no health care profession)</p> <p><u>Country</u>= USA</p> | <p><u>Exposure assessment:</u> Self-reported.</p> <p><u>Year of assessment:</u> 2001-2008</p> | <p><u>Type of symptoms:</u> PTSD</p> <p><u>Way of assessment:</u> Diagnosed, according to ICD-9-CM criteria,</p> | <p>Univariate (model 1) and multivariate (model 1) adjusting for all remaining exposures</p> | <p><b>Health Care Occupation</b></p> <p><u>No</u><br/>OR: Ref. (1 deployment)<br/>OR: Ref. (2 deployments)<br/>OR: Ref. (3 deployments)</p> <p><u>Yes</u></p>                                                                                                                                                                                                                                                                                                                                                                                                                                                                                                                                                                                                                                                                                                                                                                |

|  |                                                                        |                                                                                                                                                                                                                                                                                                                                                                                          |                                                                                                        |                                                                                                                                       |                                                                                                                                                                                                                                                                                                                                                                                                                                                                                                                                                                                                                                                                                                                                                                                                                                                       |
|--|------------------------------------------------------------------------|------------------------------------------------------------------------------------------------------------------------------------------------------------------------------------------------------------------------------------------------------------------------------------------------------------------------------------------------------------------------------------------|--------------------------------------------------------------------------------------------------------|---------------------------------------------------------------------------------------------------------------------------------------|-------------------------------------------------------------------------------------------------------------------------------------------------------------------------------------------------------------------------------------------------------------------------------------------------------------------------------------------------------------------------------------------------------------------------------------------------------------------------------------------------------------------------------------------------------------------------------------------------------------------------------------------------------------------------------------------------------------------------------------------------------------------------------------------------------------------------------------------------------|
|  | <p>longitudinal</p> <p><u>Follow-up period:</u><br/>Up to 60 days.</p> | <p><u>%Female</u>= 0%</p> <p><u>Age</u>= Ranging from 27.9 (5.7) to 30.2 (7.0) in various participating groups.</p> <p><u>Type of job/company</u>= Navy personnel with one, two or three deployments in Iraq and/or Afghanistan.</p> <p><u>Inclusion/exclusion</u>= Participants who completed a health assessment within 60 days post-deployment were included. Women were excluded</p> | <p><u>Exposure categories:</u><br/>military occupation, combat rank, deployment specific variables</p> | <p>from inpatient and outpatient databased.</p> <p><u>Incidence:</u> Ranging from 1.9% to 17.9% for various participating groups.</p> | <p>OR: 2.02 [1.45 2.80]<sup>1</sup> (1 deployment)<br/>OR: 2.27 [1.26 4.08]<sup>1</sup> (2 deployments)<br/>OR: 4.37 [1.25 15.28]<sup>1</sup> (3 deployments)</p> <p><b>Age</b><br/>OR: 0.97 [0.94 0.99]<sup>1</sup> (1 deployment)<br/>OR: 0.97 [0.93 1.02]<sup>1</sup> (2 deployments)<br/>OR: 0.94 [0.86 1.03]<sup>1</sup> (3 deployments)</p> <p><b>Rank</b><br/><u>Enlisted</u><br/>OR: Ref.<br/>OR: Ref.<br/><u>Officer</u><br/>OR: 0.35 [0.18 0.65]<sup>1</sup> (1 deployment)<br/>OR: 0.54 [0.12 2.47]<sup>1</sup> (2 deployments)</p> <p><b>Married</b><br/><u>No</u><br/>OR: Ref. (1 deployment)<br/>OR: Ref. (2 deployments)<br/>OR: Ref. (3 deployments)<br/><u>Yes</u><br/>OR: 0.93 [0.67 1.30]<sup>1</sup> (1 deployment)<br/>OR: 0.54 [0.32 0.89]<sup>1</sup> (2 deployments)<br/>OR: 0.96 [0.36 2.56]<sup>1</sup> (3 deployments)</p> |
|--|------------------------------------------------------------------------|------------------------------------------------------------------------------------------------------------------------------------------------------------------------------------------------------------------------------------------------------------------------------------------------------------------------------------------------------------------------------------------|--------------------------------------------------------------------------------------------------------|---------------------------------------------------------------------------------------------------------------------------------------|-------------------------------------------------------------------------------------------------------------------------------------------------------------------------------------------------------------------------------------------------------------------------------------------------------------------------------------------------------------------------------------------------------------------------------------------------------------------------------------------------------------------------------------------------------------------------------------------------------------------------------------------------------------------------------------------------------------------------------------------------------------------------------------------------------------------------------------------------------|

|  |  |  |  |  |  |                                                                                                                                                                                                                                                                                                                                                                                                                                                                                                                                                                                                                                                                                                                                                                                                                                                                                              |
|--|--|--|--|--|--|----------------------------------------------------------------------------------------------------------------------------------------------------------------------------------------------------------------------------------------------------------------------------------------------------------------------------------------------------------------------------------------------------------------------------------------------------------------------------------------------------------------------------------------------------------------------------------------------------------------------------------------------------------------------------------------------------------------------------------------------------------------------------------------------------------------------------------------------------------------------------------------------|
|  |  |  |  |  |  | <p><b>Some College</b></p> <p><u>No</u><br/> OR: Ref. (1 deployment)<br/> OR: Ref. (2 deployments)<br/> OR: Ref. (3 deployments)</p> <p><u>Yes</u><br/> OR: 1.61 [0.97 2.68]<sup>1</sup> (1 deployment)<br/> OR: 0.66 [0.22 1.97]<sup>1</sup> (2 deployments)<br/> OR: 0.41 [0.04 3.92]<sup>1</sup> (3 deployments)</p> <p><b>Medical utilization</b></p> <p><u>Low</u><br/> OR: Ref.<br/> OR: Ref.<br/> OR: Ref.</p> <p><u>Moderate</u><br/> OR: 6.64 [3.50 12.60]<sup>1</sup> (1 deployment)<br/> OR: 3.40 [1.64 7.06]<sup>1</sup> (2 deployments)<br/> OR: 13.84 [1.69 113.49]<sup>1</sup> (3 deployments)</p> <p><u>High</u><br/> OR: 34.52 [19.35 61.59]<sup>1</sup> (1 deployment)<br/> OR: 15.25 [7.89 29.49]<sup>1</sup> (2 deployments)<br/> OR: 46.96 [5.98 368.58]<sup>1</sup> (3 deployments)</p> <p><b>Deployment location</b></p> <p><u>Afghanistan/Iraq</u><br/> OR: Ref.</p> |
|--|--|--|--|--|--|----------------------------------------------------------------------------------------------------------------------------------------------------------------------------------------------------------------------------------------------------------------------------------------------------------------------------------------------------------------------------------------------------------------------------------------------------------------------------------------------------------------------------------------------------------------------------------------------------------------------------------------------------------------------------------------------------------------------------------------------------------------------------------------------------------------------------------------------------------------------------------------------|

|  |  |  |  |  |  |                                                                                                                                                                                                                                                                                                                                                                                                                                                                                                                                                                                                                                                                                                                                                                                                                                                                                                                      |
|--|--|--|--|--|--|----------------------------------------------------------------------------------------------------------------------------------------------------------------------------------------------------------------------------------------------------------------------------------------------------------------------------------------------------------------------------------------------------------------------------------------------------------------------------------------------------------------------------------------------------------------------------------------------------------------------------------------------------------------------------------------------------------------------------------------------------------------------------------------------------------------------------------------------------------------------------------------------------------------------|
|  |  |  |  |  |  | <p>OR: Ref.<br/>OR: Ref.<br/><u>Kuwait</u><br/>OR: 0.78 [0.55 1.10]<sup>1</sup> (1 deployment)<br/>OR: 0.81 [0.44 1.48]<sup>1</sup> (2 deployments)<br/>OR: 1.32 [0.94 1.82]<sup>1</sup> (3 deployments)</p> <p><b>Number of combat exposures</b><br/>OR: 1.62 [1.46 1.79]<sup>1</sup> (1 deployment)<br/>OR: 1.37 [1.17 1.61]<sup>1</sup> (2 deployments)<br/>OR: 1.30 [0.94 1.82]<sup>1</sup> (3 deployments)</p> <p><b>Current Deployment Time</b><br/>OR: 1.00 [1.00 1.01]<sup>1</sup> (1 deployment)<br/>OR: 1.00 [1.00 1.01]<sup>1</sup> (2 deployments)<br/>OR: 1.00 [0.99 1.01]<sup>1</sup> (3 deployments)</p> <p><b>Previous deployment time</b><br/>OR: 1.00 [1.00 1.01]<sup>1</sup> (2 deployments)<br/>OR: 1.00 [0.99 1.01]<sup>1</sup> (3 deployments)</p> <p><b>Previous dwell time</b><br/>OR: 1.00 [1.00 1.00]<sup>1</sup> (2 deployments)<br/>OR: 1.00 [1.00 1.00]<sup>1</sup> (3 deployments)</p> |
|--|--|--|--|--|--|----------------------------------------------------------------------------------------------------------------------------------------------------------------------------------------------------------------------------------------------------------------------------------------------------------------------------------------------------------------------------------------------------------------------------------------------------------------------------------------------------------------------------------------------------------------------------------------------------------------------------------------------------------------------------------------------------------------------------------------------------------------------------------------------------------------------------------------------------------------------------------------------------------------------|

|  |  |  |  |  |  |                                                                                                                                                                                                                                                                                                                                                                                                                                                                                                                                                                                                                                                                                                                                                                                                                                                                                         |
|--|--|--|--|--|--|-----------------------------------------------------------------------------------------------------------------------------------------------------------------------------------------------------------------------------------------------------------------------------------------------------------------------------------------------------------------------------------------------------------------------------------------------------------------------------------------------------------------------------------------------------------------------------------------------------------------------------------------------------------------------------------------------------------------------------------------------------------------------------------------------------------------------------------------------------------------------------------------|
|  |  |  |  |  |  | <p>deployments)</p> <p><i>Only health care occupation below</i></p> <p><b>Felt in great danger of being killed</b></p> <p><u>No</u><br/>OR: Ref.<sup>1</sup><br/>OR: Ref.<sup>2</sup></p> <p><u>Yes</u><br/>OR: 4.14 [3.13 5.46]<sup>1</sup><br/>OR: 3.44 [2.50 4.72]<sup>2</sup></p> <p><b>Engaged in direct combat and discharged weapon</b></p> <p><u>No</u><br/>OR: Ref.<sup>1</sup><br/>OR: Ref.<sup>2</sup></p> <p><u>Yes</u><br/>OR: 3.43 [2.42 4.87]<sup>1</sup><br/>OR: 1.67 [1.15 2.44]<sup>2</sup></p> <p><b>Exposed to wounded/dead civilians</b></p> <p><u>No</u><br/>OR: Ref.<sup>1</sup></p> <p><u>Yes</u><br/>OR: 1.51 [1.16 1.96]<sup>1</sup></p> <p><b>Exposed to wounded/dead friendly forces</b></p> <p><u>No</u><br/>OR: Ref.<sup>1</sup><br/>OR: Ref.<sup>2</sup></p> <p><u>Yes</u><br/>OR: 1.99 [1.52 2.60]<sup>1</sup><br/>OR: 1.53 [1.13 2.07]<sup>2</sup></p> |
|--|--|--|--|--|--|-----------------------------------------------------------------------------------------------------------------------------------------------------------------------------------------------------------------------------------------------------------------------------------------------------------------------------------------------------------------------------------------------------------------------------------------------------------------------------------------------------------------------------------------------------------------------------------------------------------------------------------------------------------------------------------------------------------------------------------------------------------------------------------------------------------------------------------------------------------------------------------------|

|                                   |                                                                                                                                                |                                                                                                                                                                                                                                                                                                                                                                                                                                |                                                                                                                                                                                                                    |                                                                                                                                                                                                 |                                                                                                      |                                                                                                                                                                  |
|-----------------------------------|------------------------------------------------------------------------------------------------------------------------------------------------|--------------------------------------------------------------------------------------------------------------------------------------------------------------------------------------------------------------------------------------------------------------------------------------------------------------------------------------------------------------------------------------------------------------------------------|--------------------------------------------------------------------------------------------------------------------------------------------------------------------------------------------------------------------|-------------------------------------------------------------------------------------------------------------------------------------------------------------------------------------------------|------------------------------------------------------------------------------------------------------|------------------------------------------------------------------------------------------------------------------------------------------------------------------|
|                                   |                                                                                                                                                |                                                                                                                                                                                                                                                                                                                                                                                                                                |                                                                                                                                                                                                                    |                                                                                                                                                                                                 |                                                                                                      | <p><b>Exposed to wounded/dead enemy</b></p> <p><u>No</u><br/>OR: Ref.<sup>1</sup></p> <p><u>Yes</u><br/>OR: 1.79 [1.38 2.34]<sup>1</sup></p>                     |
| 30. MacGregor, 2012 <sup>48</sup> | <p><u>Name:</u> Defence Manpower Data Center (DMDC)</p> <p><u>Design:</u> Prospective longitudinal</p> <p><u>Follow-up period:</u> 4 years</p> | <p><u>n</u>=65,704</p> <p><u>Country</u>= USA</p> <p><u>%Female</u>= -</p> <p><u>Age</u>= 22 (19-53)</p> <p><u>Type of job/company</u>= Marine corps personnel deployed to Iraq or Kuwait.</p> <p><u>Inclusion/exclusion</u>= Deployments between 4 and 8 months were considered. Special forces and participants with earlier mental health issues were excluded. Only those with more than one deployment were analysed.</p> | <p><u>Exposure assessment:</u> Deployment administration</p> <p><u>Year of assessment:</u> 2003-2007</p> <p><u>Exposure categories:</u> Dwell-to-deployment ratios were categorised into &lt;1:1, 1:1 and 2:1.</p> | <p><u>Type of symptoms:</u> PTSD</p> <p><u>Way of assessment:</u> Diagnosed PTSD with ICD-9-CM criteria were obtained from inpatient and outpatient registers</p> <p><u>Incidence:</u> 1.5%</p> | Adjustment for age and military rank                                                                 | <p><b>Dwell to deployment ratio</b></p> <p><u>&lt;1:1</u><br/>OR: Ref.</p> <p><u>1:1</u><br/>OR: 0.83 [0.60 1.13]</p> <p><u>2:1</u><br/>OR: 0.47 [0.32 0.70]</p> |
| 31. Maguen, 2012 <sup>49</sup>    | <p><u>Name:</u> Department of Veterans Affairs (VA) database</p>                                                                               | <p><u>n</u>= 968</p> <p><u>Country</u>= USA</p> <p><u>%Female</u>= 12%</p>                                                                                                                                                                                                                                                                                                                                                     | <p><u>Exposure assessment:</u> Department of Veterans Affairs administrative data (including self-reports)</p>                                                                                                     | <p><u>Type of symptoms:</u> PTSD</p> <p><u>Way of assessment:</u> Using the self-</p>                                                                                                           | Univariate (model 1) and multivariate (model 2), adjusting for age, sex, race, marital status, unit, | <p><b>Number of exposures</b></p> <p><u>None</u><br/>OR: Ref.</p> <p><u>OR: Ref.</u></p> <p><u>One</u></p>                                                       |

|                                |                                                                                                                                                                 |                                                                                                                                                                                                                                                                                                                                        |                                                                                                                                                                                 |                                                                                                                                                                                                                                                                                     |                                                                                               |                                                                                                                                                                                                                                                                                                                                                                                                                                                                                                                                                                                                                               |
|--------------------------------|-----------------------------------------------------------------------------------------------------------------------------------------------------------------|----------------------------------------------------------------------------------------------------------------------------------------------------------------------------------------------------------------------------------------------------------------------------------------------------------------------------------------|---------------------------------------------------------------------------------------------------------------------------------------------------------------------------------|-------------------------------------------------------------------------------------------------------------------------------------------------------------------------------------------------------------------------------------------------------------------------------------|-----------------------------------------------------------------------------------------------|-------------------------------------------------------------------------------------------------------------------------------------------------------------------------------------------------------------------------------------------------------------------------------------------------------------------------------------------------------------------------------------------------------------------------------------------------------------------------------------------------------------------------------------------------------------------------------------------------------------------------------|
|                                | <p><u>Design:</u><br/>Retrospective longitudinal</p> <p><u>Follow-up period:</u><br/>11 days</p>                                                                | <p><u>Age</u>= 30.3(8.4) years</p> <p><u>Type of job/company</u>=<br/>War veterans who have been deployed in Iran and Afghanistan.</p> <p><u>Inclusion/exclusion</u>=<br/>Participants with either no head injury or a head injury with traumatic brain injury were included, but not those with head injury without brain damage.</p> | <p><u>Year of assessment:</u><br/>2007-2010</p> <p><u>Exposure categories:</u><br/>Exposure to traumatic brain injury mechanisms</p>                                            | <p>reported Primary Care PTSD Screen (PC-PTSD) screening instrument</p> <p><u>Incidence:</u> -</p>                                                                                                                                                                                  | <p>branch of service, rank and number of deployments.</p>                                     | <p>OR: 4.93 [3.3 7.3]<sup>1</sup><br/>OR: 4.67 [3.1 7.1]<sup>2</sup><br/><u>Two+</u><br/>OR: 6.96 [5.1 9.6]<sup>1</sup><br/>OR: 6.15 [4.4 8.7]<sup>2</sup></p> <p><b>Type of exposure</b><br/><u>None</u><br/>OR: Ref.<br/>OR: Ref.<br/><u>Blast only</u><br/>OR: 5.13 [3.2 8.2]<sup>1</sup><br/>OR: 4.72 [2.9 7.7]<sup>2</sup><br/><u>Blast plus</u><br/>OR: 7.45 [5.4 10.3]<sup>1</sup><br/>OR: 6.52 [4.6 9.3]<sup>2</sup><br/><u>1 Non blast</u><br/>OR: 4.53 [2.4 8.6]<sup>1</sup><br/>OR: 4.60 [2.4 8.8]<sup>2</sup><br/><u>2+ Non blast</u><br/>OR: 2.94 [1.17 7.4]<sup>1</sup><br/>OR: 3.36 [1.32 8.6]<sup>2</sup></p> |
| 32. Maguen, 2010 <sup>50</sup> | <p><u>Name:</u><br/>Department of Veterans Affairs (VA) database</p> <p><u>Design:</u><br/>Retrospective longitudinal</p> <p><u>Follow-up period:</u><br/>-</p> | <p><u>n</u>= 329,049</p> <p><u>Country</u>= USA</p> <p><u>%Female</u>= 12%</p> <p><u>Age</u>= 31.2(9.0)</p> <p><u>Type of job/company</u>=<br/>War veterans who have been deployed in Iran and Afghanistan.</p> <p><u>Inclusion/exclusion</u>= -</p>                                                                                   | <p><u>Exposure assessment:</u><br/>Deployment data</p> <p><u>Year of assessment:</u><br/>2001</p> <p><u>Exposure categories:</u><br/>Demographic and military service data.</p> | <p><u>Type of symptoms:</u><br/>PTSD</p> <p><u>Way of assessment:</u><br/>PTSD obtained from medical health records of those who visited veteran facilities from 2002 to 2008. Diagnosis was done with ICD-9-CM criteria.</p> <p><u>Incidence:</u> 17% among females, 22% among</p> | <p>Univariate models were conducted for females (model 1) and males (model 2) separately.</p> | <p><b>Age</b><br/><u>16–24</u><br/>RR: Ref.<br/>RR: Ref.<br/><u>25–29</u><br/>RR: 1.05 [0.99 1.11]<sup>1</sup><br/>RR: 0.96 [0.94 0.97]<sup>2</sup><br/><u>30–39</u><br/>RR: 1.24 [1.17 1.32]<sup>1</sup><br/>RR: 0.98 [0.96 0.99]<sup>2</sup><br/><u>40–71</u><br/>RR: 1.21 [1.13 1.30]<sup>1</sup><br/>RR: 0.79 [0.77 0.81]<sup>2</sup></p> <p><b>Race/Ethnicity</b></p>                                                                                                                                                                                                                                                    |

|  |  |  |  |        |  |                                                                                                                                                                                                                                                                                                                                                                                                                                                                                                                                                                                                                                                                                                                                                                                                                                                                                                                                                    |
|--|--|--|--|--------|--|----------------------------------------------------------------------------------------------------------------------------------------------------------------------------------------------------------------------------------------------------------------------------------------------------------------------------------------------------------------------------------------------------------------------------------------------------------------------------------------------------------------------------------------------------------------------------------------------------------------------------------------------------------------------------------------------------------------------------------------------------------------------------------------------------------------------------------------------------------------------------------------------------------------------------------------------------|
|  |  |  |  | males. |  | <p><u>White</u><br/>RR: Ref.<br/>RR: Ref.</p> <p><u>Black</u><br/>RR: 0.95 [0.86 0.98]<sup>1</sup><br/>RR: 0.98 [0.96 1.00]<sup>2</sup></p> <p><u>Hispanic</u><br/>RR: 0.95 [0.88 1.01]<sup>1</sup><br/>RR: 0.89 [0.88 0.92]<sup>2</sup></p> <p><u>Other</u><br/>RR: 0.97 [0.86 1.10]<sup>1</sup><br/>RR: 1.02 [0.98 1.07]<sup>2</sup></p> <p><b>Marital status</b></p> <p><u>Married</u><br/>RR: Ref.<br/>RR: Ref.</p> <p><u>Never married</u><br/>RR: 0.97 [0.92 1.02]<sup>1</sup><br/>RR: 0.82 [0.80 0.83]<sup>2</sup></p> <p><u>Divorced/separated/widowed</u><br/>RR: 1.15 [1.08 1.22]<sup>1</sup><br/>RR: 1.08 [1.06 1.10]<sup>2</sup></p> <p><b>Component type</b></p> <p><u>Active duty</u><br/>RR: Ref.<br/>RR: Ref.</p> <p><u>Reserve/National Guard</u><br/>RR: 0.90 [0.86 0.94]<sup>1</sup><br/>RR: 0.74 [0.73 0.75]<sup>2</sup></p> <p><b>Branch of service</b></p> <p><u>Army</u><br/>RR: Ref.<br/>RR: Ref.</p> <p><u>Marine</u></p> |
|--|--|--|--|--------|--|----------------------------------------------------------------------------------------------------------------------------------------------------------------------------------------------------------------------------------------------------------------------------------------------------------------------------------------------------------------------------------------------------------------------------------------------------------------------------------------------------------------------------------------------------------------------------------------------------------------------------------------------------------------------------------------------------------------------------------------------------------------------------------------------------------------------------------------------------------------------------------------------------------------------------------------------------|



|                                    |                                                                                                                            |                                                                                                                                                                                          |                                                                                                                                                                                                           |                                                                                                                                                                                                                                            |   |                                                                                                                                                                                                                                                                                                                                                                                                                                                                                                                                                                                                     |
|------------------------------------|----------------------------------------------------------------------------------------------------------------------------|------------------------------------------------------------------------------------------------------------------------------------------------------------------------------------------|-----------------------------------------------------------------------------------------------------------------------------------------------------------------------------------------------------------|--------------------------------------------------------------------------------------------------------------------------------------------------------------------------------------------------------------------------------------------|---|-----------------------------------------------------------------------------------------------------------------------------------------------------------------------------------------------------------------------------------------------------------------------------------------------------------------------------------------------------------------------------------------------------------------------------------------------------------------------------------------------------------------------------------------------------------------------------------------------------|
|                                    |                                                                                                                            |                                                                                                                                                                                          |                                                                                                                                                                                                           |                                                                                                                                                                                                                                            |   | RR: 0.94 [0.85 1.05] <sup>1</sup><br>RR: 0.95 [0.93 0.97] <sup>2</sup><br><u>Navy</u><br>RR: 0.45 [0.41 0.49] <sup>1</sup><br>RR: 0.33 [0.32 0.34] <sup>2</sup><br><u>Air Force</u><br>RR: 0.45 [0.41 0.49] <sup>1</sup><br>RR: 0.26 [0.25 0.27] <sup>2</sup><br><br><b>Rank</b><br><u>Enlisted</u><br>RR: Ref.<br>RR: Ref.<br><u>Officer</u><br>RR: 0.69 [0.63 0.77] <sup>1</sup><br>RR: 0.51 [0.49 0.54] <sup>2</sup><br><br><b>Number of deployments</b><br><u>One</u><br>RR: Ref.<br>RR: Ref.<br><u>More than one</u><br>RR: 1.14 [1.09 1.19] <sup>1</sup><br>RR: 1.15 [1.13 1.16] <sup>2</sup> |
| 33. Martindale, 2018 <sup>51</sup> | <u>Name:</u> -<br><br><u>Design:</u><br>Prospective longitudinal<br><br><u>Follow-up period:</u><br>Between 6 and 9 years. | n= 19<br><br><u>Country=</u> USA<br><br><u>%Female=</u> 16%<br><br><u>Age=</u> 39.0(9.4) years.<br><br><u>Type of job/company=</u><br>Military personnel deployed in Afghanistan or Iraq | <u>Exposure assessment:</u><br>Self-reported<br><br><u>Year of assessment:</u><br>2007-2010<br><br><u>Exposure categories:</u><br>Blast exposure, traumatic brain injury and re-deployment were assessed. | <u>Type of symptoms:</u><br>PTSD<br><br><u>Way of assessment:</u><br>Via a structured interview, the Structured Clinical Interview for DSM-4 Axis I Disorders (SCID)<br><br><u>Incidence:</u> 6/19 and 5/19 had current PTSD at T1 and T2, | - | Only individual participant data were presented, showing associations between the exposures and PTSD.                                                                                                                                                                                                                                                                                                                                                                                                                                                                                               |

|                                  |                                                                                                                                                                                                      |                                                                                                                                                                                                                                                  |                                                                                                                                                                                        |                                                                                                                                                                                                                             |                    |                                                                                                                                                                                                                                                                                                                                                                                                                                                                                                                                                                                  |
|----------------------------------|------------------------------------------------------------------------------------------------------------------------------------------------------------------------------------------------------|--------------------------------------------------------------------------------------------------------------------------------------------------------------------------------------------------------------------------------------------------|----------------------------------------------------------------------------------------------------------------------------------------------------------------------------------------|-----------------------------------------------------------------------------------------------------------------------------------------------------------------------------------------------------------------------------|--------------------|----------------------------------------------------------------------------------------------------------------------------------------------------------------------------------------------------------------------------------------------------------------------------------------------------------------------------------------------------------------------------------------------------------------------------------------------------------------------------------------------------------------------------------------------------------------------------------|
|                                  |                                                                                                                                                                                                      | <u>Inclusion/exclusion</u> =<br>Participants with a history in traumatic brain injury or other neurological or mental disorders were excluded.                                                                                                   |                                                                                                                                                                                        | respectively.                                                                                                                                                                                                               |                    |                                                                                                                                                                                                                                                                                                                                                                                                                                                                                                                                                                                  |
| 34. Nagamine, 2018 <sup>52</sup> | <p><u>Name</u>: -</p> <p><u>Design</u>:<br/>Prospective longitudinal, with baseline measurements one month post-deployment.</p> <p><u>Follow-up period</u>:<br/>6 and 12 months post-deployment.</p> | <p>n= 56,753</p> <p><u>Country</u>= Japan</p> <p><u>%Female</u>= 3%</p> <p><u>Age</u>=-</p> <p><u>Type of job/company</u>=<br/>Members of the ground defence force at 2011 Great East Japan Earthquake.</p> <p><u>Inclusion/exclusion</u>= -</p> | <p><u>Exposure assessment</u>:<br/>Self-reported</p> <p><u>Year of assessment</u>: -</p> <p><u>Exposure categories</u>:<br/>Information on personal attributes and mission duties.</p> | <p><u>Type of symptoms</u>:<br/>PTSD symptoms (using a cut-off: &gt;- 25)</p> <p><u>Way of assessment</u>:<br/>Self-reported with the Impact of Event Scale-Revised (IES-R).</p> <p><u>Incidence</u>:<br/>2283/56753=4%</p> | Multivariate model | <p><b>Age</b><br/>OR: 1.39 [1.27 1.52]</p> <p><b>Sex</b><br/><u>Male</u><br/>OR: Ref.<br/><u>Female</u><br/>OR: 1.61 [1.29 2.00]</p> <p><b>Rank</b><br/><u>Enlisted/private</u><br/>OR: Ref.<br/><u>Officer</u><br/>OR: 0.77 [0.67 0.88]<br/><u>Administrative official</u><br/>OR: 1.24 [0.82 1.87]</p> <p><b>Deployment length</b><br/><u>&lt; 1 month</u><br/>OR: Ref.<br/><u>1–3 months</u><br/>OR: 1.53 [1.37 1.70]<br/><u>≥ 3 months</u><br/>OR: 2.64 [2.33 2.99]</p> <p><b>Personally affected</b><br/><u>No</u><br/>OR: Ref.<br/><u>Yes</u><br/>OR: 2.19 [1.95 2.44]</p> |

|                                |                                        |                  |                                              |                                                |                        |                                                                                                                                                                                                                                                                                                                                                                                                                                                                                                                                                                                                                                                                                                                                          |
|--------------------------------|----------------------------------------|------------------|----------------------------------------------|------------------------------------------------|------------------------|------------------------------------------------------------------------------------------------------------------------------------------------------------------------------------------------------------------------------------------------------------------------------------------------------------------------------------------------------------------------------------------------------------------------------------------------------------------------------------------------------------------------------------------------------------------------------------------------------------------------------------------------------------------------------------------------------------------------------------------|
|                                |                                        |                  |                                              |                                                |                        | <p><b>Body recovery duties</b><br/> <u>No</u><br/> OR: Ref.<br/> <u>Yes</u><br/> OR: 1.37 [1.25 1.51]</p> <p><b>Duties with radiation exposure risk</b><br/> <u>No</u><br/> OR: Ref.<br/> <u>Yes</u><br/> OR: 1.08 [0.97 1.20]</p> <p><b>Timing of post-deployment leave</b><br/> <u>Within two weeks</u><br/> OR: Ref.<br/> <u>Over two weeks</u><br/> OR: 1.34 [1.22 1.47]<br/> <u>No leave taken</u><br/> OR: 1.50 [1.29 1.75]</p> <p><b>Post-deployment overwork</b><br/> <u>No</u><br/> OR: Ref.<br/> <u>Yes: &lt; 3 months</u><br/> OR: 1.39 [1.26 1.53]<br/> <u>Yes: ≥ 3 months</u><br/> OR: 2.02 [1.78 2.29]</p> <p><b>Post-deployment relocation</b><br/> <u>No</u><br/> OR: Ref.<br/> <u>Yes</u><br/> OR: 1.12 [0.98 1.28]</p> |
| 35. Osorio, 2018 <sup>53</sup> | <u>Name:</u> Secondary analyses on the | <u>n</u> = 1,635 | <u>Exposure assessment:</u><br>Self-reported | <u>Type of symptoms:</u><br>PTSD symptoms (re- | Nine different models: | <p><b>Violent combat</b><br/> <u>No</u></p>                                                                                                                                                                                                                                                                                                                                                                                                                                                                                                                                                                                                                                                                                              |

|  |                                                                                                                                           |                                                                                                                                                                                                                                                                       |                                                                                                                                                                                 |                                                                                                                                                                                                                                                                                                                                                                                                                        |                                                                                                                                                                                                                                                                                                                                                                                                                                                                                                                                                                                                                                |                                                                                                                                                                                                                                                                                                                                                                                                                                                                                                                                                                                                                                                                                                                                                                                                                                                                                                                                                                                                                                                                                                                                     |
|--|-------------------------------------------------------------------------------------------------------------------------------------------|-----------------------------------------------------------------------------------------------------------------------------------------------------------------------------------------------------------------------------------------------------------------------|---------------------------------------------------------------------------------------------------------------------------------------------------------------------------------|------------------------------------------------------------------------------------------------------------------------------------------------------------------------------------------------------------------------------------------------------------------------------------------------------------------------------------------------------------------------------------------------------------------------|--------------------------------------------------------------------------------------------------------------------------------------------------------------------------------------------------------------------------------------------------------------------------------------------------------------------------------------------------------------------------------------------------------------------------------------------------------------------------------------------------------------------------------------------------------------------------------------------------------------------------------|-------------------------------------------------------------------------------------------------------------------------------------------------------------------------------------------------------------------------------------------------------------------------------------------------------------------------------------------------------------------------------------------------------------------------------------------------------------------------------------------------------------------------------------------------------------------------------------------------------------------------------------------------------------------------------------------------------------------------------------------------------------------------------------------------------------------------------------------------------------------------------------------------------------------------------------------------------------------------------------------------------------------------------------------------------------------------------------------------------------------------------------|
|  | <p>Battlemind RCT.</p> <p><u>Design:</u><br/>Prospective longitudinal</p> <p><u>Follow-up period:</u><br/>4-6 months post deployment.</p> | <p><u>Country</u>= UK</p> <p><u>%Female</u>= 2%</p> <p><u>Age</u>= 39% was younger than 25 years.</p> <p><u>Type of job/company</u>= Members of three branches of the army forces, returning from deployment in Afghanistan.</p> <p><u>Inclusion/exclusion</u>= -</p> | <p><u>Year of assessment:</u><br/>2009</p> <p><u>Exposure categories:</u><br/>Violent combat situations, proximity to wounding or death and encountering explosive devices.</p> | <p>experience is extracted for this review - in the paper also: avoidance, numbing, arousal and anxious is reported)</p> <p><u>Way of assessment:</u><br/>Using the National Center for Posttraumatic Stress Disorders Checklist – Civilian Version (PCL-C). PTSD in general, but also avoiding, numbing and arousal behaviour were reported. For this review we only extracted PTSD.</p> <p><u>Incidence:</u> 34%</p> | <p>Model 1: Unadjusted</p> <p>Model 2: Adjusted</p> <p>Model 3: Adjusted for proximity to wounding or death.</p> <p>Model 4: Adjusted for encountering explosive devices.</p> <p>Model 5: adjusted for PTSD re-experiencing, avoidance, numbing, or arousal.</p> <p>Model 6: Adjusted for distress.</p> <p>Model 7: Adjusted for alcohol.</p> <p>Model 8: Ranks, deployment and gender.</p> <p>Model 9: Adjusted for violent combat, proximity to wounding or death, encountering explosive devices, PTSD re-experiencing, avoidance, numbing, arousal, distress, alcohol consumption, rank, gender, reserves, deployment.</p> | <p>RR: Ref.<sup>1</sup></p> <p>RR: Ref.<sup>2</sup></p> <p>RR: Ref.<sup>3</sup></p> <p>RR: Ref.<sup>4</sup></p> <p>RR: Ref.<sup>5</sup></p> <p>RR: Ref.<sup>6</sup></p> <p>RR: Ref.<sup>7</sup></p> <p>RR: Ref.<sup>8</sup></p> <p>RR: Ref.<sup>9</sup></p> <p><u>Yes</u></p> <p>RR: 2.43 [1.95 3.02]<sup>1</sup></p> <p>RR: —<sup>2</sup></p> <p>RR: 1.56 [1.21 2.01]<sup>3</sup></p> <p>RR: 2.04 [1.62 2.58]<sup>4</sup></p> <p>RR: 1.81 [1.43 2.29]<sup>5</sup></p> <p>RR: 2.63 [2.10 3.31]<sup>6</sup></p> <p>RR: 2.32 [1.85 2.89]<sup>7</sup></p> <p>RR: 2.36 [1.89 2.95]<sup>8</sup></p> <p>RR: 1.35 [1.01 1.81]<sup>9</sup></p> <p><b>Proximity to wounding or death</b></p> <p><u>No</u></p> <p>RR: Ref.<sup>1</sup></p> <p>RR: Ref.<sup>2</sup></p> <p>RR: Ref.<sup>3</sup></p> <p>RR: Ref.<sup>4</sup></p> <p>RR: Ref.<sup>5</sup></p> <p>RR: Ref.<sup>6</sup></p> <p>RR: Ref.<sup>7</sup></p> <p>RR: Ref.<sup>8</sup></p> <p>RR: Ref.<sup>9</sup></p> <p><u>Yes</u></p> <p>RR: 3.01 [2.42 3.74]<sup>1</sup></p> <p>RR: 2.42 [1.89 3.11]<sup>2</sup></p> <p>RR: —<sup>3</sup></p> <p>RR: 2.62 [2.08 3.31]<sup>4</sup></p> |
|--|-------------------------------------------------------------------------------------------------------------------------------------------|-----------------------------------------------------------------------------------------------------------------------------------------------------------------------------------------------------------------------------------------------------------------------|---------------------------------------------------------------------------------------------------------------------------------------------------------------------------------|------------------------------------------------------------------------------------------------------------------------------------------------------------------------------------------------------------------------------------------------------------------------------------------------------------------------------------------------------------------------------------------------------------------------|--------------------------------------------------------------------------------------------------------------------------------------------------------------------------------------------------------------------------------------------------------------------------------------------------------------------------------------------------------------------------------------------------------------------------------------------------------------------------------------------------------------------------------------------------------------------------------------------------------------------------------|-------------------------------------------------------------------------------------------------------------------------------------------------------------------------------------------------------------------------------------------------------------------------------------------------------------------------------------------------------------------------------------------------------------------------------------------------------------------------------------------------------------------------------------------------------------------------------------------------------------------------------------------------------------------------------------------------------------------------------------------------------------------------------------------------------------------------------------------------------------------------------------------------------------------------------------------------------------------------------------------------------------------------------------------------------------------------------------------------------------------------------------|

|                                       |                                                                                                                                 |                                                                                                                                            |                                                                                                                                                       |                                                                                                                                                  |                                                                                                                                                                     |                                                                                                                                                                                                                                                                                                                                                                                                                                                                                                                                                                                                                                                                                                                                                                                                                              |
|---------------------------------------|---------------------------------------------------------------------------------------------------------------------------------|--------------------------------------------------------------------------------------------------------------------------------------------|-------------------------------------------------------------------------------------------------------------------------------------------------------|--------------------------------------------------------------------------------------------------------------------------------------------------|---------------------------------------------------------------------------------------------------------------------------------------------------------------------|------------------------------------------------------------------------------------------------------------------------------------------------------------------------------------------------------------------------------------------------------------------------------------------------------------------------------------------------------------------------------------------------------------------------------------------------------------------------------------------------------------------------------------------------------------------------------------------------------------------------------------------------------------------------------------------------------------------------------------------------------------------------------------------------------------------------------|
|                                       |                                                                                                                                 |                                                                                                                                            |                                                                                                                                                       |                                                                                                                                                  |                                                                                                                                                                     | RR: 2.02 [1.59 2.56] <sup>5</sup><br>RR: 3.03 [2.42 3.80] <sup>6</sup><br>RR: 2.94 [2.36 3.67] <sup>7</sup><br>RR: 3.01 [2.41 3.75] <sup>8</sup><br>RR: 1.67 [1.25 2.23] <sup>9</sup><br><br><b>Encountering explosive devices</b><br><u>No</u><br>RR: Ref. <sup>1</sup><br>RR: Ref. <sup>2</sup><br>RR: Ref. <sup>3</sup><br>RR: Ref. <sup>4</sup><br>RR: Ref. <sup>5</sup><br>RR: Ref. <sup>6</sup><br>RR: Ref. <sup>7</sup><br>RR: Ref. <sup>8</sup><br>RR: Ref. <sup>9</sup><br><u>Yes</u><br>RR: 2.14 [1.71 2.67] <sup>1</sup><br>RR: 1.66 [1.30 2.10] <sup>2</sup><br>RR: 1.54 [1.21 1.95] <sup>3</sup><br>RR: — <sup>4</sup><br>RR: 1.70 [1.33 2.16] <sup>5</sup><br>RR: 2.17 [1.72 2.73] <sup>6</sup><br>RR: 2.01 [1.60 2.52] <sup>7</sup><br>RR: 2.06 [1.65 2.59] <sup>8</sup><br>RR: 1.26 [0.95 1.66] <sup>9</sup> |
| 36. Pihl-Thingvad, 2019 <sup>54</sup> | <u>Name:</u> Everyday violence project<br><br><u>Design:</u> Prospective longitudinal<br><br><u>Follow-up period:</u> 12 months | n= 1,763<br><br><u>Country=</u> Denmark<br><br><u>%Female=</u> 78%<br><br><u>Age=</u> 48.7 (9.4) years.<br><br><u>Type of job/company=</u> | <u>Exposure assessment:</u> Self-reported.<br><br><u>Year of assessment:</u> 2016-2017<br><br><u>Exposure categories:</u> Patient-initiated violence. | <u>Type of symptoms:</u> PTSD<br><br><u>Way of assessment:</u> Self-reported using the International Trauma Questionnaire, with ICD-11 criteria. | Crude model adjusting for age and gender (model 1), additionally adjusting for BMI, alcohol, years of experience, critical incidents outside of work, posttraumatic | <b>Frequency of violence</b><br><u>No violence</u><br>OR: Ref.<br>OR: Ref.<br>OR: Ref.<br><u>Low frequency</u><br>OR: 4.4 [1.3 14.8] <sup>1</sup><br>OR: 3.0 [0.90 10.4] <sup>2</sup><br>OR: 4.0 [1.0 16.3] <sup>3</sup>                                                                                                                                                                                                                                                                                                                                                                                                                                                                                                                                                                                                     |

|                                 |                                                                                                            |                                                                                                                                                                       |                                                                                                                            |                                                                                                                                        |                                                                                                                                                                                                                  |                                                                                                                                                                                                                                                                                                                                                                                                                                                                                                                                                                                                                                                                                                                                                                                                                                                                                                                                                                     |
|---------------------------------|------------------------------------------------------------------------------------------------------------|-----------------------------------------------------------------------------------------------------------------------------------------------------------------------|----------------------------------------------------------------------------------------------------------------------------|----------------------------------------------------------------------------------------------------------------------------------------|------------------------------------------------------------------------------------------------------------------------------------------------------------------------------------------------------------------|---------------------------------------------------------------------------------------------------------------------------------------------------------------------------------------------------------------------------------------------------------------------------------------------------------------------------------------------------------------------------------------------------------------------------------------------------------------------------------------------------------------------------------------------------------------------------------------------------------------------------------------------------------------------------------------------------------------------------------------------------------------------------------------------------------------------------------------------------------------------------------------------------------------------------------------------------------------------|
|                                 |                                                                                                            | <p>Social educators working with disabled adults.</p> <p><u>Inclusion/exclusion</u>= Participants in leadership position and with PTSD at baseline were excluded.</p> |                                                                                                                            | <p><u>Incidence</u>: 3.5%</p>                                                                                                          | <p>stress disorder symptom level at baseline, trauma coping self-efficacy, workplace social capital linking, and training (model 2). In model 3, additional for frequency and severity of violence was done.</p> | <p><u>Medium frequency</u><br/>OR: 6.3 [1.8 22.9]<sup>1</sup><br/>OR: 3.7 [1.0 13.8]<sup>2</sup><br/>OR: 5.9 [1.4 24.2]<sup>3</sup></p> <p><u>High frequency</u><br/>OR: 10.2 [2.9 36.3]<sup>1</sup><br/>OR: 4.2 [1.1 15.9]<sup>2</sup><br/>OR: 6.5 [1.6 25.6]<sup>3</sup></p> <p><b>Severity of violence</b><br/><u>No violence</u><br/>OR: Ref.<br/>OR: Ref.<br/>OR: Ref.</p> <p><u>Max. mild violence</u><br/>OR: 2.3 [0.2 22.8]<sup>1</sup><br/>OR: 2.3 [0.2 24.4]<sup>2</sup><br/>OR: 3.8 [0.3 46.2]<sup>3</sup></p> <p><u>Max. threats of violence</u><br/>OR: 5.1 [1.5 17.5]<sup>1</sup><br/>OR: 3.6 [1.0 12.4]<sup>2</sup><br/>OR: 5.4 [1.2 24.2]<sup>3</sup></p> <p><u>Max. moderate violence</u><br/>OR: 4.1 [1.1 14.5]<sup>1</sup><br/>OR: 2.1 [0.6 8.1]<sup>2</sup><br/>OR: 2.6 [0.6 10.8]<sup>3</sup></p> <p><u>Max. severe violence</u><br/>OR: 13.7 [3.1 37.1]<sup>1</sup><br/>OR: 5.3 [1.5 19.5]<sup>2</sup><br/>OR: 6.5 [1.6 26.0]<sup>3</sup></p> |
| 37. Polusny, 2011 <sup>55</sup> | <p><u>Name</u>: Readiness and Resilience in National Guard Soldiers.</p> <p><u>Design</u>: Prospective</p> | <p><u>n</u>= 426</p> <p><u>Country</u>= USA</p> <p><u>%Female</u>= 12%</p> <p><u>Age</u>= Mostly younger</p>                                                          | <p><u>Exposure assessment</u>: Self-reported</p> <p><u>Year of assessment</u>: 2006</p> <p><u>Exposure categories</u>:</p> | <p><u>Type of symptoms</u>: Probable PTSD (new onset)</p> <p><u>Way of assessment</u>: Self-reported using the PCL checklist, with</p> | <p>Adjusting for all other pre-deployment factors (model 1), additionally adjusting for deployment</p>                                                                                                           | <p><b>Baseline PTSD symptoms</b><br/><u>No</u><br/>OR: Ref.<sup>1</sup><br/>OR: Ref.<sup>2</sup><br/>OR: Ref.<sup>3</sup></p> <p><u>Yes</u><br/>OR: 0.73 [0.34 1.58]<sup>1</sup></p>                                                                                                                                                                                                                                                                                                                                                                                                                                                                                                                                                                                                                                                                                                                                                                                |

|  |                                                          |                                                                                                                                                              |                                                                       |                                              |                                                                                                    |                                                                                                                                                                                                                                                                                                                                                                                                                                                                                                                                                                                                                                                                                                                                                                                                                                                                                                                                      |
|--|----------------------------------------------------------|--------------------------------------------------------------------------------------------------------------------------------------------------------------|-----------------------------------------------------------------------|----------------------------------------------|----------------------------------------------------------------------------------------------------|--------------------------------------------------------------------------------------------------------------------------------------------------------------------------------------------------------------------------------------------------------------------------------------------------------------------------------------------------------------------------------------------------------------------------------------------------------------------------------------------------------------------------------------------------------------------------------------------------------------------------------------------------------------------------------------------------------------------------------------------------------------------------------------------------------------------------------------------------------------------------------------------------------------------------------------|
|  | longitudinal<br><br><u>Follow-up period:</u><br>2 months | than 30.<br><br><u>Type of job/company</u> =<br>National Guard soldiers<br><br><u>Inclusion/exclusion</u> =<br>Those with PTSD at<br>baseline were excluded. | Psychosocial risk,<br>protective factors and<br>deployment exposures. | DSM-4 criteria.<br><br><u>Incidence:</u> 14% | exposures (model 2)<br>and additionally<br>adjusting for post-<br>deployment factors<br>(model 3). | OR: 0.79 [0.34 1.85] <sup>2</sup><br>OR: 0.69 [0.27 1.79] <sup>3</sup><br><br><b>Military preparedness</b><br><u>No</u><br>OR: Ref. <sup>1</sup><br>OR: Ref. <sup>2</sup><br>OR: Ref. <sup>3</sup><br><u>Yes</u><br>OR: 0.58 [0.39 0.87] <sup>1</sup><br>OR: 0.62 [0.40 0.95] <sup>2</sup><br>OR: 0.77 [0.48 1.25] <sup>3</sup><br><br><b>Concerns about life/family<br/>disruptions</b><br><u>No</u><br>OR: Ref. <sup>1</sup><br>OR: Ref. <sup>2</sup><br>OR: Ref. <sup>3</sup><br><u>Yes</u><br>OR: 1.38 [0.97 1.97] <sup>1</sup><br>OR: 1.31 [0.88 1.95] <sup>2</sup><br>OR: 1.12 [0.71 1.77] <sup>3</sup><br><br><b>Unit support</b><br><u>No</u><br>OR: Ref. <sup>1</sup><br>OR: Ref. <sup>2</sup><br>OR: Ref. <sup>3</sup><br><u>Yes</u><br>OR: 1.43 [0.95 2.15] <sup>1</sup><br>OR: 1.15 [0.73 1.79] <sup>2</sup><br>OR: 1.15 [0.70 1.89] <sup>3</sup><br><br><b>Combat experiences</b><br><u>No</u><br>OR: Ref. <sup>2</sup> |
|--|----------------------------------------------------------|--------------------------------------------------------------------------------------------------------------------------------------------------------------|-----------------------------------------------------------------------|----------------------------------------------|----------------------------------------------------------------------------------------------------|--------------------------------------------------------------------------------------------------------------------------------------------------------------------------------------------------------------------------------------------------------------------------------------------------------------------------------------------------------------------------------------------------------------------------------------------------------------------------------------------------------------------------------------------------------------------------------------------------------------------------------------------------------------------------------------------------------------------------------------------------------------------------------------------------------------------------------------------------------------------------------------------------------------------------------------|

|                                 |                |                |                                              |                                           |   |                                                                                                                                                                                                                                                                                                                                                                                                                                                                                                                                                                                                                                                                                                                                                                                                                                 |
|---------------------------------|----------------|----------------|----------------------------------------------|-------------------------------------------|---|---------------------------------------------------------------------------------------------------------------------------------------------------------------------------------------------------------------------------------------------------------------------------------------------------------------------------------------------------------------------------------------------------------------------------------------------------------------------------------------------------------------------------------------------------------------------------------------------------------------------------------------------------------------------------------------------------------------------------------------------------------------------------------------------------------------------------------|
|                                 |                |                |                                              |                                           |   | <p>OR: Ref.<sup>3</sup><br/> <u>Yes</u><br/> OR: 2.19 [1.40 3.41]<sup>2</sup><br/> OR: 2.35 [1.41 3.92]<sup>3</sup></p> <p><b>Exposure to aftermath of battle</b><br/> <u>No</u><br/> OR: Ref.<sup>2</sup><br/> OR: Ref.<sup>3</sup><br/> <u>Yes</u><br/> OR: 1.62 [1.04 2.53]<sup>2</sup><br/> OR: 1.81 [1.08 3.06]<sup>3</sup></p> <p><b>Perceived life threat</b><br/> <u>No</u><br/> OR: Ref.<sup>2</sup><br/> OR: Ref.<sup>3</sup><br/> <u>Yes</u><br/> OR: 1.21 [0.81 1.81]<sup>2</sup><br/> OR: 1.01 [0.63 1.64]<sup>3</sup></p> <p><b>Post-deployment social support</b><br/> <u>No</u><br/> OR: Ref.<sup>3</sup><br/> <u>Yes</u><br/> OR: 0.31 [0.19 0.50]<sup>3</sup></p> <p><b>Post-deployment life stressors</b><br/> <u>No</u><br/> OR: Ref.<sup>3</sup><br/> <u>Yes</u><br/> OR: 1.96 [1.17 3.28]<sup>3</sup></p> |
| 38. Reijnen, 2015 <sup>56</sup> | <u>Name:</u> - | <u>n</u> = 994 | <u>Exposure assessment:</u><br>Self-reported | <u>Type of symptoms:</u><br>PTSD symptoms | - | <b>Deployment</b><br>Pre-deployment                                                                                                                                                                                                                                                                                                                                                                                                                                                                                                                                                                                                                                                                                                                                                                                             |



|                      |                                                                                                                                                                        |                                                                                                                                                                                                                                                                                    |                                                                                                                                                                                                                      |                                                                                                                                                            |                                                                                                                                                                                                                                                                |                                                                                                                                                                                                                                                                                                                                                                                                                                                                                                                                                                                                                                                                                                                      |
|----------------------|------------------------------------------------------------------------------------------------------------------------------------------------------------------------|------------------------------------------------------------------------------------------------------------------------------------------------------------------------------------------------------------------------------------------------------------------------------------|----------------------------------------------------------------------------------------------------------------------------------------------------------------------------------------------------------------------|------------------------------------------------------------------------------------------------------------------------------------------------------------|----------------------------------------------------------------------------------------------------------------------------------------------------------------------------------------------------------------------------------------------------------------|----------------------------------------------------------------------------------------------------------------------------------------------------------------------------------------------------------------------------------------------------------------------------------------------------------------------------------------------------------------------------------------------------------------------------------------------------------------------------------------------------------------------------------------------------------------------------------------------------------------------------------------------------------------------------------------------------------------------|
|                      | <p><b>Design:</b><br/>Prospective longitudinal with baseline measurements 1 month prior to deployment</p> <p><b>Follow-up period:</b><br/>2 years post deployment.</p> | <p><b>Country=</b> Netherlands</p> <p><b>%Female=</b> 9%</p> <p><b>Age=</b> 28.5 (9.0)</p> <p><b>Type of job/company=</b><br/>Dutch military personnel who were deployed to Afghanistan</p> <p><b>Inclusion/exclusion=-</b></p>                                                    | <p><b>Year of assessment:</b><br/>2005-2008</p> <p><b>Exposure categories:</b><br/>Different categories of time since deployment (compared to pre-deployment)</p>                                                    | <p><b>Way of assessment:</b><br/>Self-reported with the Dutch Self-Rating Inventory for PTSD, using DSM-4 cut-off values</p> <p><b>Incidence:</b> 8.9%</p> |                                                                                                                                                                                                                                                                | <p>OR: Ref</p> <p><b>1 month post-deployment</b><br/>OR: 2.12 [1.4 3.3]</p> <p><b>6 months post-deployment</b><br/>OR: 2.18 [1.4 3.4]</p> <p><b>1 year post-deployment</b><br/>OR: 1.62 [1.0 2.6]</p> <p><b>2 years post-deployment</b><br/>OR: 1.33 [2.8 5.8]</p>                                                                                                                                                                                                                                                                                                                                                                                                                                                   |
| 39. Shea, 2013<br>57 | <p><b>Name:</b> -</p> <p><b>Design:</b><br/>Prospective longitudinal</p> <p><b>Follow-up period:</b><br/>6 months post deployment.</p>                                 | <p>n= 238</p> <p><b>Country=</b> USA</p> <p><b>%Female=</b> 8%</p> <p><b>Age=</b> 33.5 (9.5) years.</p> <p><b>Type of job/company=</b><br/>Members of the National Guard units recently returned from deployment to Iraq and Afghanistan.</p> <p><b>Inclusion/exclusion=</b> -</p> | <p><b>Exposure assessment:</b><br/>Self-reported</p> <p><b>Year of assessment:</b><br/>2006-2009</p> <p><b>Exposure categories:</b><br/>Personal characteristics, pre-deployment and deployment characteristics.</p> | <p><b>Type of symptoms:</b><br/>PTSD</p> <p><b>Way of assessment:</b><br/>Diagnosed during a CAPS structured interview.</p> <p><b>Incidence:</b> 13%</p>   | <p>Adjusting for demographics (model 1), additionally adjusting for pre-deployment characteristics (model 2), additionally adjusting for deployment-related variables (model 3), and additionally adjusting for post-deployment characteristics (model 4).</p> | <p>It is unclear what the reference group is for the below associations</p> <p><b>Gender</b><br/>OR: 1.03 [0.12 8.89]<sup>1</sup><br/>OR: 0.46 [0.04 5.14]<sup>2</sup><br/>OR: 0.94 [0.03 28.56]<sup>3</sup><br/>OR: 1.12 [0.03 38.70]<sup>4</sup></p> <p><b>Ethnicity</b><br/>OR: 0.33 [0.04 2.64]<sup>1</sup><br/>OR: 0.17 [0.02 1.61]<sup>2</sup><br/>OR: 0.08 [0.00 1.45]<sup>3</sup><br/>OR: 0.07 [0.00 1.18]<sup>4</sup></p> <p><b>Age</b><br/>OR: 1.09 [0.69 1.72]<sup>1</sup><br/>OR: 1.01 [0.60 1.72]<sup>2</sup><br/>OR: 0.7 [0.34 1.41]<sup>3</sup><br/>OR: 1.12 [0.31 1.45]<sup>4</sup></p> <p><b>Negative temperament</b><br/>OR: 2.95 [1.66 5.23]<sup>2</sup><br/>OR: 2.23 [1.18 4.22]<sup>3</sup></p> |

|                             |                                                        |                                                    |                                                                                                        |                                                                                     |                                                                                    |                                                                                                                                                                                                                                                                                                                                                                                                                                                                                                                                                                                                                                                                                                                                                                                                                                                                                                                                                                             |
|-----------------------------|--------------------------------------------------------|----------------------------------------------------|--------------------------------------------------------------------------------------------------------|-------------------------------------------------------------------------------------|------------------------------------------------------------------------------------|-----------------------------------------------------------------------------------------------------------------------------------------------------------------------------------------------------------------------------------------------------------------------------------------------------------------------------------------------------------------------------------------------------------------------------------------------------------------------------------------------------------------------------------------------------------------------------------------------------------------------------------------------------------------------------------------------------------------------------------------------------------------------------------------------------------------------------------------------------------------------------------------------------------------------------------------------------------------------------|
|                             |                                                        |                                                    |                                                                                                        |                                                                                     |                                                                                    | <p>OR: 1.46 [0.69 3.09]<sup>4</sup></p> <p><b>Pre-deployment life events</b><br/> OR: 1.92 [1.19 3.10]<sup>2</sup><br/> OR: 1.78 [1.00 3.19]<sup>3</sup><br/> OR: 1.1 [0.56 2.18]<sup>4</sup></p> <p><b>Preparation and training</b><br/> OR: 0.89 [0.52 1.55]<sup>2</sup><br/> OR: 1.41 [0.68 2.91]<sup>3</sup><br/> OR: 1.99 [0.83 4.62]<sup>4</sup></p> <p><b>Life and family concerns</b><br/> OR: 2.77 [1.34 5.75]<sup>3</sup><br/> OR: 2.77 [1.28 6.01]<sup>4</sup></p> <p><b>Deployment environment</b><br/> OR: 1.44 [0.68 3.05]<sup>3</sup><br/> OR: 1.31 [0.58 2.99]<sup>4</sup></p> <p><b>Unit support</b><br/> OR: 1.03 [0.56 1.90]<sup>3</sup><br/> OR: 1.15 [0.58 2.30]<sup>4</sup></p> <p><b>Combat exposure</b><br/> OR: 1.88 [1.01 3.50]<sup>3</sup><br/> OR: 2.00 [1.01 3.97]<sup>4</sup></p> <p><b>Post-deployment support</b><br/> OR: 0.36 [0.15 0.87]<sup>4</sup></p> <p><b>Post-deployment life events</b><br/> OR: 1.82 [0.98 3.39]<sup>4</sup></p> |
| 40. Soo, 2011 <sup>58</sup> | <p><u>Name:</u> FDNY-WTC-MMP</p> <p><u>Design:</u></p> | <p><u>n</u>= 11,006</p> <p><u>Country</u>= USA</p> | <p><u>Exposure assessment:</u><br/> Demographics and work status and number of colleagues who died</p> | <p><u>Type of symptoms:</u><br/> Probable PTSD</p> <p><u>Way of assessment:</u></p> | <p>Univariate (model 1 &amp; 3) and adjusted for all other exposures (model 2)</p> | <p><b>Arrival group</b><br/> <u>Group 3 and 4</u><br/> HR: Ref<sup>1</sup><br/> HR: Ref<sup>2</sup></p>                                                                                                                                                                                                                                                                                                                                                                                                                                                                                                                                                                                                                                                                                                                                                                                                                                                                     |

|  |                                                                                                                           |                                                                                                                                                                                                                                                                                                                                 |                                                                                                                                                                                      |                                                                                                          |                                                                                                   |                                                                                                                                                                                                                                                                                                                                                                                                                                                                                                                                                                                                                                                                                                                                                                                                                                                                                                                                                                                                                                                      |
|--|---------------------------------------------------------------------------------------------------------------------------|---------------------------------------------------------------------------------------------------------------------------------------------------------------------------------------------------------------------------------------------------------------------------------------------------------------------------------|--------------------------------------------------------------------------------------------------------------------------------------------------------------------------------------|----------------------------------------------------------------------------------------------------------|---------------------------------------------------------------------------------------------------|------------------------------------------------------------------------------------------------------------------------------------------------------------------------------------------------------------------------------------------------------------------------------------------------------------------------------------------------------------------------------------------------------------------------------------------------------------------------------------------------------------------------------------------------------------------------------------------------------------------------------------------------------------------------------------------------------------------------------------------------------------------------------------------------------------------------------------------------------------------------------------------------------------------------------------------------------------------------------------------------------------------------------------------------------|
|  | <p>Prospective longitudinal</p> <p><u>Follow-up period:</u><br/>9 years, with follow-up measurements every 18 months.</p> | <p><u>%Female</u>= 0%</p> <p><u>Age</u>= 39.5 (7.4) years</p> <p><u>Type of job/company</u>=<br/>New York firefighters involved in the 9/11 WTC attacks.</p> <p><u>Inclusion/exclusion</u>=<br/>Firefighters who arrived at the site more than 14 days before the close of the WTC site were included. Women were excluded.</p> | <p>were obtained from databases. Other variables were self-reported.</p> <p><u>Year of assessment:</u><br/>2002</p> <p><u>Exposure categories:</u><br/>Exposure to the WTC sites</p> | <p>Self-reported using the PCL-C checklist.</p> <p><u>Incidence:</u> 8% (after the first follow-up).</p> | <p>&amp; 4), for those with PTSD at baseline (model 1 &amp; 2) and without (model 3 &amp; 4).</p> | <p>HR: Ref<sup>3</sup><br/>HR: Ref<sup>4</sup></p> <p><u>Group 1</u><br/>HR: 0.76 [0.58-1.00]<sup>1</sup><br/>HR: 0.74 [0.56-0.99]<sup>2</sup><br/>HR: 2.21 [1.80-2.70]<sup>3</sup><br/>HR: 1.38 [1.12-1.70]<sup>4</sup></p> <p><u>Group 2</u><br/>HR: 0.97 [0.75-1.25]<sup>1</sup><br/>HR: 0.85 [0.66-1.11]<sup>2</sup><br/>HR: 1.16 [0.98-1.39]<sup>3</sup><br/>HR: 0.90 [0.75-1.08]<sup>4</sup></p> <p><b>≥1 death at firehouse on 9/11</b></p> <p><u>No</u><br/>HR: Ref.<sup>1</sup><br/>HR: Ref.<sup>2</sup><br/>HR: Ref.<sup>3</sup><br/>HR: Ref.<sup>4</sup></p> <p><u>Yes</u><br/>HR: 0.84 [0.71-1.00]<sup>1</sup><br/>HR: 0.87 [0.73-1.04]<sup>2</sup><br/>HR: 1.31 [1.12-1.54]<sup>3</sup><br/>HR: 1.11 [0.95-1.31]<sup>4</sup></p> <p><b>Received counselling during year 1</b></p> <p><u>No</u><br/>HR: Ref.<sup>1</sup><br/>HR: Ref.<sup>2</sup><br/>HR: Ref.<sup>3</sup><br/>HR: Ref.<sup>4</sup></p> <p><u>Yes</u><br/>HR: 0.89 [0.76-1.04]<sup>1</sup><br/>HR: 0.98 [0.83-1.15]<sup>2</sup><br/>HR: 2.02 [1.74-2.35]<sup>3</sup></p> |
|--|---------------------------------------------------------------------------------------------------------------------------|---------------------------------------------------------------------------------------------------------------------------------------------------------------------------------------------------------------------------------------------------------------------------------------------------------------------------------|--------------------------------------------------------------------------------------------------------------------------------------------------------------------------------------|----------------------------------------------------------------------------------------------------------|---------------------------------------------------------------------------------------------------|------------------------------------------------------------------------------------------------------------------------------------------------------------------------------------------------------------------------------------------------------------------------------------------------------------------------------------------------------------------------------------------------------------------------------------------------------------------------------------------------------------------------------------------------------------------------------------------------------------------------------------------------------------------------------------------------------------------------------------------------------------------------------------------------------------------------------------------------------------------------------------------------------------------------------------------------------------------------------------------------------------------------------------------------------|

|  |  |  |  |  |  |                                                                                                                                                                                                                                                                                                                                                                                                                                                                                                                                                                                                                                                                                                                                                                                                                                                                                                                                                                                                                                                                                                                                                  |
|--|--|--|--|--|--|--------------------------------------------------------------------------------------------------------------------------------------------------------------------------------------------------------------------------------------------------------------------------------------------------------------------------------------------------------------------------------------------------------------------------------------------------------------------------------------------------------------------------------------------------------------------------------------------------------------------------------------------------------------------------------------------------------------------------------------------------------------------------------------------------------------------------------------------------------------------------------------------------------------------------------------------------------------------------------------------------------------------------------------------------------------------------------------------------------------------------------------------------|
|  |  |  |  |  |  | <p>HR: 1.59 [1.36-1.85]<sup>4</sup></p> <p><b>Each concurrent aerodigestive symptom</b></p> <p><u>No</u></p> <p>HR: Ref.<sup>1</sup><br/>HR: Ref.<sup>2</sup><br/>HR: Ref.<sup>3</sup><br/>HR: Ref.<sup>4</sup></p> <p><u>Yes</u></p> <p>HR: 0.87 [0.84-0.90]<sup>1</sup><br/>HR: 0.89 [0.86-0.93]<sup>2</sup><br/>HR: 1.62 [1.56-1.67]<sup>3</sup><br/>HR: 1.45 [1.40-1.51]<sup>4</sup></p> <p><b>Concurrent alcohol intake</b></p> <p><u>No increase since 9/11</u></p> <p><u>Increased since 9/11</u></p> <p>HR: 0.77 [0.53-1.12]<sup>1</sup><br/>HR: 0.83 [0.56-1.22]<sup>2</sup><br/>HR: 5.85 [4.56-7.52]<sup>3</sup><br/>HR: 3.43 [2.67-4.43]<sup>4</sup></p> <p><u>Increased since 9/11, now back to pre-9/11 levels</u></p> <p>HR: 0.95 [0.76-1.18]<sup>1</sup><br/>HR: 1.01 [0.81-1.27]<sup>2</sup><br/>HR: 2.95 [2.46-3.55]<sup>3</sup><br/>HR: 2.06 [1.71-2.47]<sup>4</sup></p> <p><b>Concurrent exercise</b></p> <p><u>No change since last questionnaire</u></p> <p><u>Decreased since last questionnaire</u></p> <p>HR: 0.74 [0.62-0.88]<sup>1</sup><br/>HR: 0.76 [0.63-0.92]<sup>2</sup><br/>HR: 2.65 [2.27-3.09]<sup>3</sup></p> |
|--|--|--|--|--|--|--------------------------------------------------------------------------------------------------------------------------------------------------------------------------------------------------------------------------------------------------------------------------------------------------------------------------------------------------------------------------------------------------------------------------------------------------------------------------------------------------------------------------------------------------------------------------------------------------------------------------------------------------------------------------------------------------------------------------------------------------------------------------------------------------------------------------------------------------------------------------------------------------------------------------------------------------------------------------------------------------------------------------------------------------------------------------------------------------------------------------------------------------|

|  |  |  |  |  |  |                                                                                                                                                                                                                                                                                                                                                                                                                                                                                                                                                                                                                                                                                                                                                                                                                                                                                                                                                                                                                                                                                                                     |
|--|--|--|--|--|--|---------------------------------------------------------------------------------------------------------------------------------------------------------------------------------------------------------------------------------------------------------------------------------------------------------------------------------------------------------------------------------------------------------------------------------------------------------------------------------------------------------------------------------------------------------------------------------------------------------------------------------------------------------------------------------------------------------------------------------------------------------------------------------------------------------------------------------------------------------------------------------------------------------------------------------------------------------------------------------------------------------------------------------------------------------------------------------------------------------------------|
|  |  |  |  |  |  | <p>HR: 1.69 [1.44-1.97]<sup>4</sup><br/> <u>Decreased since last questionnaire for health reasons</u><br/> HR: 0.38 [0.28-0.52]<sup>1</sup><br/> HR: 0.56 [0.41-0.78]<sup>2</sup><br/> HR: 4.20 [3.53-4.99]<sup>3</sup><br/> HR: 3.19 [2.64-3.86]<sup>4</sup><br/> <u>Increased since last questionnaire</u><br/> HR: 0.95 [0.77-1.18]<sup>1</sup><br/> HR: 0.92 [0.74-1.14]<sup>2</sup><br/> HR: 1.13 [0.91-1.41]<sup>3</sup><br/> HR: 0.92 [0.74-1.14]<sup>4</sup></p> <p><b>Concurrent smoking status</b><br/> <u>Never</u><br/> <u>Current</u><br/> HR: 1.03 [0.81-1.32]<sup>1</sup><br/> HR: 1.04 [0.81-1.33]<sup>2</sup><br/> HR: 1.13 [0.90-1.42]<sup>3</sup><br/> HR: 1.07 [0.85-1.35]<sup>4</sup><br/> <u>Former</u><br/> HR: 0.91 [0.76-1.08]<sup>1</sup><br/> HR: 0.95 [0.79-1.15]<sup>2</sup><br/> HR: 1.24 [1.07-1.43]<sup>3</sup><br/> HR: 1.23 [1.06-1.42]<sup>4</sup></p> <p><b>Experience with prior disaster</b><br/> <u>No</u><br/> HR: Ref.<sup>1</sup><br/> HR: Ref.<sup>2</sup><br/> HR: Ref.<sup>3</sup><br/> HR: Ref.<sup>4</sup><br/> <u>Yes</u><br/> HR: 0.82 [0.69-0.96]<sup>1</sup></p> |
|--|--|--|--|--|--|---------------------------------------------------------------------------------------------------------------------------------------------------------------------------------------------------------------------------------------------------------------------------------------------------------------------------------------------------------------------------------------------------------------------------------------------------------------------------------------------------------------------------------------------------------------------------------------------------------------------------------------------------------------------------------------------------------------------------------------------------------------------------------------------------------------------------------------------------------------------------------------------------------------------------------------------------------------------------------------------------------------------------------------------------------------------------------------------------------------------|

|                                   |                                                                                                                       |                                                                                                                                                                                                                                                                                                                     |                                                                                                                                                                            |                                                                                                                                                                                                                           |                                                                                                                  |                                                                                                                                                                                                                                                                                                                                                                                                                                                                                                                                                                 |
|-----------------------------------|-----------------------------------------------------------------------------------------------------------------------|---------------------------------------------------------------------------------------------------------------------------------------------------------------------------------------------------------------------------------------------------------------------------------------------------------------------|----------------------------------------------------------------------------------------------------------------------------------------------------------------------------|---------------------------------------------------------------------------------------------------------------------------------------------------------------------------------------------------------------------------|------------------------------------------------------------------------------------------------------------------|-----------------------------------------------------------------------------------------------------------------------------------------------------------------------------------------------------------------------------------------------------------------------------------------------------------------------------------------------------------------------------------------------------------------------------------------------------------------------------------------------------------------------------------------------------------------|
|                                   |                                                                                                                       |                                                                                                                                                                                                                                                                                                                     |                                                                                                                                                                            |                                                                                                                                                                                                                           |                                                                                                                  | <p>HR: 0.86 [0.73-1.02]<sup>2</sup><br/> HR: 1.29 [1.13-1.48]<sup>3</sup><br/> HR: 1.11 [0.96-1.27]<sup>4</sup></p> <p><b>Non-white race/ethnicity</b><br/> <u>No</u><br/> HR: Ref.<sup>1</sup><br/> HR: Ref.<sup>2</sup><br/> HR: Ref.<sup>3</sup><br/> HR: Ref.<sup>4</sup><br/> <u>Yes</u><br/> HR: 0.98 [0.70-1.36]<sup>1</sup><br/> HR: 1.05 [0.75-1.46]<sup>2</sup><br/> HR: 1.20 [0.94-1.54]<sup>3</sup><br/> HR: 1.37 [1.07-1.75]<sup>4</sup></p> <p><b>Age on 9/11</b><br/> HR: 1.02 [1.01-1.04]<sup>2</sup><br/> HR: 1.00 [0.99-1.01]<sup>4</sup></p> |
| 41. Stevelink, 2018 <sup>59</sup> | <p><u>Name:</u> HERRICK cohort</p> <p><u>Design:</u> Retrospective longitudinal</p> <p><u>Follow-up period:</u> -</p> | <p>n=8,093</p> <p><u>Country=</u> UK</p> <p><u>%Female=</u> 13% and 8% for those who were deployed and not</p> <p><u>Age=</u> 40.0 (13.0) and 40.2 (9.4) for those who were not and were deployed, respectively.</p> <p><u>Type of job/company=</u> Military personnel that were and were not deployed in Iraq.</p> | <p><u>Exposure assessment:</u> Deployment administration</p> <p><u>Year of assessment:</u> 2014-2016</p> <p><u>Exposure categories:</u> Deployment and service status.</p> | <p><u>Type of symptoms:</u> Probable PTSD</p> <p><u>Way of assessment:</u> Self-reported with the PCL-C checklist.</p> <p><u>Incidence:</u> 5.2% and 6.9% for those who were not deployed and deployed, respectively.</p> | <p>Unadjusted (model 1) and adjusted for age, gender, marital status, education, service and rank (model 2).</p> | <p><b>Deployment</b><br/> <u>Regulars</u><br/> <u>Not deployed</u><br/> OR: Ref<sup>1</sup><br/> OR: Ref<sup>2</sup><br/> <u>Deployed</u><br/> OR: 1.34 [1.00 1.78]<sup>1</sup><br/> OR: 1.41 [1.04 1.90]<sup>2</sup></p> <p><u>Reservists</u><br/> <u>Not deployed</u><br/> OR: Ref<sup>1</sup><br/> OR: Ref<sup>2</sup><br/> <u>Deployed</u><br/> OR: 2.25 [1.14 4.46]<sup>1</sup><br/> OR: 2.48 [1.20 5.16]<sup>2</sup></p> <p><b>Serving status</b></p>                                                                                                     |

|                                  |                                                                                                                                                           |                                                                                                                                                                                                                 |                                                                                                                                                                      |                                                                                                                                                                                                                                                   |            |                                                                                                                                                                                                                                                                                                                                                                                                                                                                                                                                                                                                     |
|----------------------------------|-----------------------------------------------------------------------------------------------------------------------------------------------------------|-----------------------------------------------------------------------------------------------------------------------------------------------------------------------------------------------------------------|----------------------------------------------------------------------------------------------------------------------------------------------------------------------|---------------------------------------------------------------------------------------------------------------------------------------------------------------------------------------------------------------------------------------------------|------------|-----------------------------------------------------------------------------------------------------------------------------------------------------------------------------------------------------------------------------------------------------------------------------------------------------------------------------------------------------------------------------------------------------------------------------------------------------------------------------------------------------------------------------------------------------------------------------------------------------|
|                                  |                                                                                                                                                           | <u>Inclusion/exclusion= -</u>                                                                                                                                                                                   |                                                                                                                                                                      |                                                                                                                                                                                                                                                   |            | <u>Not serving</u><br>OR: Ref <sup>1</sup><br>OR: Ref <sup>2</sup><br><u>Serving</u><br>OR: 1.60 [1.25 2.06] <sup>1</sup><br>OR: 1.73 [1.25 2.40] <sup>2</sup><br><br><b>Role during last deployment</b><br><i>Serving regulars</i><br><u>No combat</u><br>OR: Ref <sup>1</sup><br>OR: Ref <sup>2</sup><br><u>Combat</u><br>OR: 1.70 [1.08 2.67] <sup>1</sup><br>OR: 1.58 [0.98 2.55] <sup>2</sup><br><br><i>Ex-serving regulars</i><br><u>No combat</u><br>OR: Ref <sup>1</sup><br>OR: Ref <sup>2</sup><br><u>Combat</u><br>OR: 3.39 [2.25 5.11] <sup>1</sup><br>OR: 2.53 [1.60 3.99] <sup>2</sup> |
| 42. Wittchen, 2012 <sup>60</sup> | <u>Name:</u> PIT-PTSD+ study<br><br><u>Design:</u><br>Retrospective longitudinal<br><br><u>Follow-up period:</u><br>On average 12 months post-deployment. | <u>n</u> = 1,483<br><br><u>Country</u> = Germany<br><br><u>%Female</u> = -<br><br><u>Age</u> = -<br><br><u>Type of job/company</u> =<br>Soldiers deployed in Afghanistan, and those who have not been deployed. | <u>Exposure assessment:</u><br>Deployment administration<br><br><u>Year of assessment:</u><br>2010<br><br><u>Exposure categories:</u><br>Deployment characteristics. | <u>Type of symptoms:</u><br>PTSD<br><br><u>Way of assessment:</u><br>Diagnosed with a structured interview using DSM-4 criteria.<br><br><u>Incidence:</u> 12 month incidence: 2.1% and 0.2% in the deployed and non-deployed group ,respectively. | Unadjusted | <b>Population</b><br><u>Control group</u><br>OR: Ref. (12 month diagnosis)<br>OR: Ref. (12 month incidence)<br>OR: Ref. (lifetime prevalence)<br><u>Deployed soldiers</u><br>OR: 2.5 [1.1 5.6] (12 month diagnosis)<br>OR: 4.2 [0.7 24.5] (12 month incidence)<br>OR: 1.7 [0.96 3.1] (lifetime prevalence)<br><br><b>Deployed soldiers</b>                                                                                                                                                                                                                                                          |

|                                                            |  |                               |  |  |  |                                                                                                                                                                                                                                                                                                                                                                                                                          |
|------------------------------------------------------------|--|-------------------------------|--|--|--|--------------------------------------------------------------------------------------------------------------------------------------------------------------------------------------------------------------------------------------------------------------------------------------------------------------------------------------------------------------------------------------------------------------------------|
|                                                            |  | <u>Inclusion/exclusion= -</u> |  |  |  | <u>Control soldiers</u><br>OR: Ref. (12 month diagnosis)<br>OR: Ref. (12 month incidence)<br>OR: Ref. (lifetime prevalence)<br><u>Kunduz</u><br>OR: 2.1 [0.8 5.8] (12 month diagnosis)<br>OR: 6.6 [1.03 41.9] (12 month incidence)<br>OR: 1.7 [0.8 3.6] (lifetime prevalence)<br><u>Combat units</u><br>OR: 3.3 [0.5 23.7] (12 month diagnosis)<br>OR: - (12 month incidence)<br>OR: 2.6 [0.7 9.4] (lifetime prevalence) |
| OR = Odds ratio<br>RR = Relative risk<br>HR = Hazard ratio |  |                               |  |  |  |                                                                                                                                                                                                                                                                                                                                                                                                                          |
