# Supplementary material for: What work-related exposures are associated with post-traumatic stress disorder? A systematic review with meta-analysis
Source: PubMed Central journal article supplement — BMJ Open. 2021 Aug 25;11(8):e049651. doi: 10.1136/bmjopen-2021-049651 (PMC8388294; doi:10.1136/bmjopen-2021-049651), 2021-08-25
Supplement: bmjopen-2021-049651supp004.pdf [file bmjopen-2021-049651supp004.pdf]

Supplementary file 4. Risk of bias of included articles. The risk of bias (i.e. low, moderate and high risk of bias) in six domains (i.e. study participation, study attrition, prognostic factor (i.e. exposure), outcome, study confounding and statistical analysis) is depicted, while also sum scores are shown.

| First author, year of publication               | Participation | Attrition | Prognostic factor | Outcome  | Confounding | Analysis/reporting |
|-------------------------------------------------|---------------|-----------|-------------------|----------|-------------|--------------------|
| 1 Armed Forces Health Surveillance Center, 2011 | Moderate      | Moderate  | Moderate          | Low      | High        | High               |
| 2 Andersen, 2019                                | Moderate      | Moderate  | Moderate          | Moderate | Low         | Low                |
| 3 Anderson, 2019                                | Low           | Moderate  | Moderate          | Moderate | Low         | Low                |
| 4 Berninger, 2010                               | High          | High      | Low               | Moderate | Low         | Low                |
| 5 Brownlow, 2018                                | Moderate      | Moderate  | Moderate          | Moderate | High        | Low                |
| 6 Brundage, 2015                                | Low           | Low       | Low               | Low      | High        | High               |
| 7 Cameron, 2019                                 | Low           | Low       | Low               | Low      | Low         | Low                |
| 8 Chi u, 2011                                   | Low           | Moderate  | Moderate          | Moderate | Low         | Low                |
| 9 Ciarleglio, 2018                              | Low           | Moderate  | Moderate          | Low      | Low         | Low                |
| 10 Cone, 2015                                   | High          | High      | Moderate          | Moderate | Low         | Low                |
| 11 Connorton, 2011                              | Moderate      | Moderate  | High              | High     | Moderate    | Low                |
| 12 Cukor, 2011                                  | Low           | Moderate  | Moderate          | Moderate | Low         | Low                |
| 13 Fear, 2010                                   | High          | High      | Low               | Moderate | Low         | Low                |
| 14 Ferrajao, 2016                               | High          | High      | Moderate          | Moderate | High        | Low                |
| 15 Fichera, 2015                                | High          | High      | Moderate          | Moderate | Low         | Low                |
| 16 Fink, 2016                                   | High          | High      | Moderate          | Moderate | High        | Low                |
| 17 Goodwin, 2012                                | Low           | Low       | Moderate          | Moderate | Low         | Low                |
| 18 Green, 2016                                  | Moderate      | Moderate  | Moderate          | Low      | High        | Low                |
| 19 Hansen, 2017                                 | High          | Moderate  | Moderate          | Moderate | Low         | Low                |
| 20 Harvey, 2012                                 | High          | Moderate  | Low               | Moderate | Low         | Low                |
| 21 Horesh, 2011                                 | Moderate      | Moderate  | Moderate          | Moderate | High        | Moderate           |
| 22 Hourani, 2012                                | Moderate      | High      | Moderate          | Moderate | High        | High               |
| 23 Ikeda, 2017                                  | Moderate      | Moderate  | Moderate          | Moderate | Low         | Low                |
| 24 Joseph, 2014                                 | Moderate      | Moderate  | Moderate          | Moderate | Low         | Low                |
| 25 Karstoft, 2013                               | Moderate      | Low       | Moderate          | Moderate | High        | Low                |
| 26 Karstoft, 2015                               | Moderate      | Low       | Moderate          | Moderate | High        | Low                |
| 27 Kim, 2014                                    | Low           | Low       | Moderate          | Low      | Low         | Low                |
| 28 Levin-Rector, 2018                           | Low           | Low       | Low               | Low      | Moderate    | Low                |
| 29 MacGregor, 2015                              | Moderate      | Moderate  | Low               | Low      | Low         | Low                |
| 30 MacGregor, 2012                              | Low           | Low       | Low               | Low      | Low         | Low                |
| 31 Maguen, 2012                                 | Moderate      | Moderate  | Moderate          | Moderate | Low         | Low                |
| 32 Maguen, 2010                                 | Moderate      | Moderate  | Low               | Low      | High        | Low                |
| 33 Martindale, 2018                             | High          | Moderate  | Moderate          | Low      | High        | High               |
| 34 Nagamine, 2018                               | Moderate      | Moderate  | Moderate          | Moderate | High        | Low                |
| 35 Osorio, 2018                                 | High          | High      | Moderate          | Moderate | Low         | Low                |
| 36 Pihl-Thingvad, 2019                          | Low           | Low       | Moderate          | Moderate | Low         | Low                |
| 37 Polusny, 2011                                | Moderate      | Moderate  | Moderate          | Moderate | Low         | Low                |
| 38 Reijnen, 2015                                | High          | High      | Moderate          | Moderate | High        | Low                |
| 39 Shea, 2013                                   | Moderate      | Moderate  | Moderate          | Low      | Low         | Low                |
| 40 Soo, 2011                                    | Moderate      | Moderate  | Moderate          | Moderate | Low         | Low                |
| 41 Stevelink, 2018                              | High          | High      | Moderate          | Moderate | Low         | Low                |
| 42 Wittchen, 2012                               | Moderate      | Moderate  | Moderate          | Low      | High        | Low                |
