# Supplementary material for: What work-related exposures are associated with post-traumatic stress disorder? A systematic review with meta-analysis
Source: PubMed Central journal article supplement — BMJ Open. 2021 Aug 25;11(8):e049651. doi: 10.1136/bmjopen-2021-049651 (PMC8388294; doi:10.1136/bmjopen-2021-049651), 2021-08-25
Supplement: bmjopen-2021-049651supp005.pdf [file bmjopen-2021-049651supp005.pdf]

## Supplementary file 5. Risk of bias of included studies.

| First author, Year;                                            | Item               | Risk of bias | Reason                                                                                                                                  |
|----------------------------------------------------------------|--------------------|--------------|-----------------------------------------------------------------------------------------------------------------------------------------|
| 1. Armed Forces Health Surveillance Center, 2011 <sup>21</sup> | Participation      | Moderate     | All armed forces were eligible, but no non-participant analysis has been presented by the authors.                                      |
|                                                                | Attrition          | Moderate     | No loss to follow-up analyses were presented by the authors.                                                                            |
|                                                                | Prognostic factor  | Moderate     | Although prognostic factors were self-reported, no substantial bias can be expected from self-reports of the current prognostic factors |
|                                                                | Outcome            | Low          | Outcomes were diagnosed in a hospital                                                                                                   |
|                                                                | Confounding        | High         | No confounding analysis has been conducted                                                                                              |
|                                                                | Analysis/reporting | High         | No proper analysis has been conducted, only descriptives were presented.                                                                |
| 2. Andersen, 2019 <sup>19</sup>                                | Participation      | Moderate     | No non-participant analysis has been presented by the authors.                                                                          |
|                                                                | Attrition          | Moderate     | No loss to follow-up analyses were presented by the authors.                                                                            |
|                                                                | Prognostic factor  | Moderate     | Prognostic factors were self-reported                                                                                                   |
|                                                                | Outcome            | Moderate     | Outcomes were self-reported                                                                                                             |
|                                                                | Confounding        | Low          | Multivariate analyses were done with all available exposures                                                                            |
|                                                                | Analysis/reporting | Low          | Adequate analyses were used                                                                                                             |
| 3. Anderson, 2019 <sup>20</sup>                                | Participation      | Low          | 86% of eligible participants, participated at baseline.                                                                                 |
|                                                                | Attrition          | Moderate     | 60% of the participants were filled out their follow-up questionnaires                                                                  |
|                                                                | Prognostic factor  | Moderate     | Prognostic factors were self-reported                                                                                                   |
|                                                                | Outcome            | Moderate     | Outcomes were self-reported                                                                                                             |
|                                                                | Confounding        | Low          | Multivariate analyses were done with all available exposures                                                                            |
|                                                                | Analysis/reporting | Low          | Adequate analyses were used                                                                                                             |
| 4. Berninger, 2010 <sup>22</sup>                               | Participation      | High         | There were differences (e.g. in PTSD status) between participants and non-participants                                                  |
|                                                                | Attrition          | High         | Participants without follow-up data were excluded. The above therefore also holds for those lost at follow-up                           |
|                                                                | Prognostic factor  | Low          | Prognostic factors were self-reported and from registers                                                                                |
|                                                                | Outcome            | Moderate     | Outcomes were self-reported                                                                                                             |
|                                                                | Confounding        | Low          | Multivariate analyses were done with all available exposures                                                                            |
|                                                                | Analysis/reporting | Low          | Adequate analyses were used                                                                                                             |
| 5. Brownlow, 2018 <sup>23</sup>                                | Participation      | Moderate     | No non-participant analysis has been presented by the authors.                                                                          |
|                                                                | Attrition          | Moderate     | No loss to follow-up analyses were presented by the authors.                                                                            |
|                                                                | Prognostic factor  | Moderate     | Prognostic factors were self-reported                                                                                                   |
|                                                                | Outcome            | Moderate     | Outcomes were self-reported                                                                                                             |
|                                                                | Confounding        | High         | Only univariate analyses were reported                                                                                                  |

|                                   |                    |          |                                                                                  |
|-----------------------------------|--------------------|----------|----------------------------------------------------------------------------------|
|                                   | Analysis/reporting | Low      | Adequate analyses were used                                                      |
| 6. Brundage, 2015 <sup>24</sup>   | Participation      | Low      | It appears as if all eligible participants were analysed.                        |
|                                   | Attrition          | Low      | It appears as if all eligible participants were analysed.                        |
|                                   | Prognostic factor  | Low      | Deployment records were used                                                     |
|                                   | Outcome            | Low      | Outcomes were diagnosed (it appears).                                            |
|                                   | Confounding        | High     | No confounding adjustment were done                                              |
|                                   | Analysis/reporting | High     | Only descriptive statistics were provided                                        |
| 7. Cameron, 2019 <sup>25</sup>    | Participation      | Low      | It appears as if all eligible participants were analysed.                        |
|                                   | Attrition          | Low      | It appears as if all eligible participants were analysed.                        |
|                                   | Prognostic factor  | Low      | Deployment records were used                                                     |
|                                   | Outcome            | Low      | Outcomes were diagnosed                                                          |
|                                   | Confounding        | Low      | Multivariate analyses were done with all available exposures                     |
|                                   | Analysis/reporting | Low      | Adequate analyses were used                                                      |
| 8. Chiu, 2011 <sup>26</sup>       | Participation      | Low      | There were some differences between responders and non-responders.               |
|                                   | Attrition          | Moderate | Since data were gathered retrospective, participation and attrition are similar. |
|                                   | Prognostic factor  | Moderate | Both self-reports and employer data were used                                    |
|                                   | Outcome            | Moderate | Outcomes were self-reported using a validated questionnaire                      |
|                                   | Confounding        | Low      | Confounding adjustment was performed.                                            |
|                                   | Analysis/reporting | Low      | Adequate analyses were used                                                      |
| 9. Ciarleglio, 2018 <sup>27</sup> | Participation      | Low      | 11% non-response                                                                 |
|                                   | Attrition          | Moderate | Since data were gathered retrospective, participation and attrition are similar. |
|                                   | Prognostic factor  | Moderate | Both self-reports and employer data were used                                    |
|                                   | Outcome            | Low      | Outcome was diagnosed                                                            |
|                                   | Confounding        | Low      | Multivariate analyses were done with all available exposures                     |
|                                   | Analysis/reporting | Low      | Adequate analyses were used                                                      |
| 10. Cone, 2015 <sup>28</sup>      | Participation      | High     | There are substantial differences between responders and non-responders.         |
|                                   | Attrition          | High     | There was substantial loss to follow-up                                          |
|                                   | Prognostic factor  | Moderate | Prognostic factors were self-reported                                            |
|                                   | Outcome            | Moderate | Outcomes were self-reported                                                      |
|                                   | Confounding        | Low      | Adjustment for confounding was performed.                                        |
|                                   | Analysis/reporting | Low      | Adequate analyses were conducted                                                 |
| 11. Connorton, 2011 <sup>29</sup> | Participation      | Moderate | No non-participant analysis has been presented by the authors.                   |
|                                   | Attrition          | Moderate | No loss to follow-up analyses were presented by the authors.                     |
|                                   | Prognostic factor  | High     | Prognostic factors were self-reported and it is unclear how                      |
|                                   | Outcome            | High     | Outcomes were self-reported and it is unclear how                                |

|                                  |                    |          |                                                                                                                       |
|----------------------------------|--------------------|----------|-----------------------------------------------------------------------------------------------------------------------|
|                                  | Confounding        | Moderate | Multivariate analyses are not reported and it is unclear what was done                                                |
|                                  | Analysis/reporting | Low      | Adequate analyses were done.                                                                                          |
| 12. Cukor, 2011 <sup>30</sup>    | Participation      | Low      | There was 86% participation                                                                                           |
|                                  | Attrition          | Moderate | There was 67% participation at follow-up                                                                              |
|                                  | Prognostic factor  | Moderate | Prognostic factors were self-reported.                                                                                |
|                                  | Outcome            | Moderate | Outcomes were self-reported and obtained from interviews, with interview data used for exposure-outcome associations. |
|                                  | Confounding        | Low      | Adjustment for confounding was performed.                                                                             |
|                                  | Analysis/reporting | Low      | Adequate analyses were conducted                                                                                      |
| 13. Fear, 2010 <sup>31</sup>     | Participation      | High     | There are substantial differences between responders and non-responders.                                              |
|                                  | Attrition          | High     | There was substantial loss to follow-up                                                                               |
|                                  | Prognostic factor  | Low      | Deployment administrative data were used                                                                              |
|                                  | Outcome            | Moderate | Outcomes were self-reported                                                                                           |
|                                  | Confounding        | Low      | Adjustment for confounding was performed.                                                                             |
|                                  | Analysis/reporting | Low      | Adequate analyses were conducted                                                                                      |
| 14. Ferrajao, 2016 <sup>32</sup> | Participation      | High     | Unclear but probably low participation rate                                                                           |
|                                  | Attrition          | High     | Since data were gathered retrospective, participation and attrition are similar.                                      |
|                                  | Prognostic factor  | Moderate | Prognostic factors were self-reported                                                                                 |
|                                  | Outcome            | Moderate | Outcomes were self-reported                                                                                           |
|                                  | Confounding        | High     | No adjustment for confounding was performed.                                                                          |
|                                  | Analysis/reporting | Low      | Adequate analyses were conducted                                                                                      |
| 15. Fichera, 2015 <sup>33</sup>  | Participation      | High     | There was substantial non-response                                                                                    |
|                                  | Attrition          | High     | There was substantial loss to follow-up                                                                               |
|                                  | Prognostic factor  | Moderate | Prognostic factors were self-reported                                                                                 |
|                                  | Outcome            | Moderate | Outcomes were self-reported                                                                                           |
|                                  | Confounding        | Low      | Adjustment for confounding was performed.                                                                             |
|                                  | Analysis/reporting | Low      | Adequate analyses were conducted                                                                                      |
| 16. Fink, 2016 <sup>34</sup>     | Participation      | High     | There was substantial non-response                                                                                    |
|                                  | Attrition          | High     | There was substantial loss to follow-up                                                                               |
|                                  | Prognostic factor  | Moderate | Prognostic factors were self-reported                                                                                 |
|                                  | Outcome            | Moderate | Outcomes were self-reported                                                                                           |
|                                  | Confounding        | High     | No adjustment for confounding was performed.                                                                          |
|                                  | Analysis/reporting | Low      | Adequate analyses were conducted                                                                                      |
| 17. Goodwin, 2012 <sup>35</sup>  | Participation      | Low      | There were no substantial differences between responders and non-responders.                                          |
|                                  | Attrition          | Low      | There were no substantial differences between responders and non-responders (including                                |

|                                 |                    |          |                                                                                                     |
|---------------------------------|--------------------|----------|-----------------------------------------------------------------------------------------------------|
|                                 |                    |          | those lost to follow-up).                                                                           |
|                                 | Prognostic factor  | Moderate | Prognostic factors were self-reported.                                                              |
|                                 | Outcome            | Moderate | Outcome was self-reported                                                                           |
|                                 | Confounding        | Low      | Confounding was properly adjusted for                                                               |
|                                 | Analysis/reporting | Low      | Appropriate analyses were used.                                                                     |
| 18. Green, 2016 <sup>36</sup>   | Participation      | Moderate | There was a substantial non-response (20%)                                                          |
|                                 | Attrition          | Moderate | There was a substantial loss to follow-up (39%)                                                     |
|                                 | Prognostic factor  | Moderate | Prognostic factors were self-reported.                                                              |
|                                 | Outcome            | Low      | Outcome was diagnosed in an interview                                                               |
|                                 | Confounding        | High     | No confounding adjustment was conducted                                                             |
|                                 | Analysis/reporting | Low      | Appropriate analyses were used.                                                                     |
| 19. Hansen, 2017 <sup>37</sup>  | Participation      | High     | There was a substantial amount of non-responders and no non-responder analysis.                     |
|                                 | Attrition          | Moderate | There was a substantial amount of participants lost to follow-up and no loss to follow-up analysis. |
|                                 | Prognostic factor  | Moderate | Prognostic factors were self-reported                                                               |
|                                 | Outcome            | Moderate | Outcomes were self-reported                                                                         |
|                                 | Confounding        | Low      | Confounding was properly adjusted for                                                               |
|                                 | Analysis/reporting | Low      | Appropriate analyses were used.                                                                     |
| 20. Harvey, 2012 <sup>38</sup>  | Participation      | High     | There were substantial differences (e.g. in age and gender) between responders and non-responders.  |
|                                 | Attrition          | Moderate | No loss to follow-up analysis were reported                                                         |
|                                 | Prognostic factor  | Low      | Prospective factors were determined based on deployment characteristics                             |
|                                 | Outcome            | Moderate | Outcome was self-reported                                                                           |
|                                 | Confounding        | Low      | Confounding was properly adjusted for                                                               |
|                                 | Analysis/reporting | Low      | Appropriate analyses were used.                                                                     |
| 21. Horesh, 2011 <sup>39</sup>  | Participation      | Moderate | No non-responder analysis was performed                                                             |
|                                 | Attrition          | Moderate | No loss to follow-up analysis was performed                                                         |
|                                 | Prognostic factor  | Moderate | Prognostic factors were self-reported                                                               |
|                                 | Outcome            | Moderate | Outcome was self-reported                                                                           |
|                                 | Confounding        | High     | No confounding analyses were conducted                                                              |
|                                 | Analysis/reporting | Moderate | The description of the analysis is unclear                                                          |
| 22. Hourani, 2012 <sup>40</sup> | Participation      | Moderate | No non-responder analysis was performed                                                             |
|                                 | Attrition          | High     | There was substantial loss to follow-up in this study                                               |
|                                 | Prognostic factor  | Moderate | Prognostic factors were self-reported                                                               |
|                                 | Outcome            | Moderate | Outcome was self-reported                                                                           |

|                                  |                    |          |                                                                                                                  |
|----------------------------------|--------------------|----------|------------------------------------------------------------------------------------------------------------------|
|                                  | Confounding        | High     | No confounding analyses were conducted (at least, not for the exposure-outcome associations)                     |
|                                  | Analysis/reporting | High     | Only descriptive statistics were reported (at least, for the exposure-outcome associations)                      |
| 23. Ikeda, 2017 <sup>41</sup>    | Participation      | Moderate | About 15% non-response.                                                                                          |
|                                  | Attrition          | Moderate | There was substantial loss to follow-up with differences between those who were and were not lost.               |
|                                  | Prognostic factor  | Moderate | Prognostic factors were self-reported                                                                            |
|                                  | Outcome            | Moderate | Outcome was self-reported                                                                                        |
|                                  | Confounding        | Low      | Confounding was properly adjusted for                                                                            |
|                                  | Analysis/reporting | Low      | Appropriate analyses were used.                                                                                  |
| 24. Joseph, 2014 <sup>42</sup>   | Participation      | Moderate | There was a substantial non-response                                                                             |
|                                  | Attrition          | Moderate | There was a substantial loss to follow-up                                                                        |
|                                  | Prognostic factor  | Moderate | Prognostic factors were self-reported                                                                            |
|                                  | Outcome            | Moderate | Outcome was self-reported                                                                                        |
|                                  | Confounding        | Low      | Confounding was properly adjusted for                                                                            |
|                                  | Analysis/reporting | Low      | Appropriate analyses were used.                                                                                  |
| 25. Karstoft, 2013 <sup>43</sup> | Participation      | Moderate | No non-responder analyses were presented                                                                         |
|                                  | Attrition          | Low      | Loss to follow-up analyses indicated no substantial differences between those who remained in the cohort or not. |
|                                  | Prognostic factor  | Moderate | Prognostic factors were self-reported                                                                            |
|                                  | Outcome            | Moderate | Outcome was self-reported                                                                                        |
|                                  | Confounding        | High     | No adjustment for confounding were performed                                                                     |
|                                  | Analysis/reporting | Low      | Adequate statistical analyses were conducted                                                                     |
| 26. Karstoft, 2015 <sup>44</sup> | Participation      | Moderate | No non-responder analyses were presented                                                                         |
|                                  | Attrition          | Low      | Loss to follow-up analyses indicated no substantial differences between those who remained in the cohort or not. |
|                                  | Prognostic factor  | Moderate | Prognostic factors were self-reported                                                                            |
|                                  | Outcome            | Moderate | Outcome was self-reported                                                                                        |
|                                  | Confounding        | High     | No adjustment for confounding were performed                                                                     |
|                                  | Analysis/reporting | Low      | Adequate statistical analyses were conducted                                                                     |
| 27. Kim, 2014 <sup>45</sup>      | Participation      | Low      | Very high >99% participation rate                                                                                |
|                                  | Attrition          | Low      | Very high >99% participation rate in follow-up                                                                   |
|                                  | Prognostic factor  | Moderate | Prognostic factors were self-reported                                                                            |
|                                  | Outcome            | Low      | Outcome was diagnosed during an interview                                                                        |
|                                  | Confounding        | Low      | Adjustment for confounding was performed                                                                         |

|                                      |                    |          |                                                                          |
|--------------------------------------|--------------------|----------|--------------------------------------------------------------------------|
|                                      | Analysis/reporting | Low      | Adequate analyses were conducted                                         |
| 28. Levin-Rector, 2018 <sup>46</sup> | Participation      | Low      | Responders comprised >90% of the eligible population                     |
|                                      | Attrition          | Low      | Participants during follow-up comprised >90% of the cohort               |
|                                      | Prognostic factor  | Low      | Prognostic factors were obtained from database information               |
|                                      | Outcome            | Low      | Outcomes were obtained from diagnosed register information               |
|                                      | Confounding        | Moderate | Only adjustment for clustering within units was done                     |
|                                      | Analysis/reporting | Low      | Adequate statistical analyses were conducted                             |
| 29. MacGregor, 2015 <sup>47</sup>    | Participation      | Moderate | It is unclear what the non-response in this study was                    |
|                                      | Attrition          | Moderate | It is unclear what the loss to follow-up in this study was               |
|                                      | Prognostic factor  | Low      | Prognostic factors were obtained from register data                      |
|                                      | Outcome            | Low      | Outcomes were obtained from register data and were diagnosed.            |
|                                      | Confounding        | Low      | Adjustment for confounding has been conducted                            |
|                                      | Analysis/reporting | Low      | Adequate statistical analyses were used.                                 |
| 30. MacGregor, 2012 <sup>48</sup>    | Participation      | Low      | All eligible participants were analysed.                                 |
|                                      | Attrition          | Low      | All eligible participants were analysed.                                 |
|                                      | Prognostic factor  | Low      | Register data were used                                                  |
|                                      | Outcome            | Low      | Diagnosed register data were used                                        |
|                                      | Confounding        | Low      | Adjustment for confounding has been conducted                            |
|                                      | Analysis/reporting | Low      | Adequate statistical analyses were used.                                 |
| 31. Maguen, 2012 <sup>49</sup>       | Participation      | Moderate | No non-responder analyses were presented                                 |
|                                      | Attrition          | Moderate | No loss to follow-up analyses were presented                             |
|                                      | Prognostic factor  | Moderate | Prognostic factors were self-reported                                    |
|                                      | Outcome            | Moderate | Outcome was self-reported                                                |
|                                      | Confounding        | Low      | Adjustment for confounding was done                                      |
|                                      | Analysis/reporting | Low      | Adequate analyses were used                                              |
| 32. Maguen, 2010 <sup>50</sup>       | Participation      | Moderate | No non-responder analyses were presented                                 |
|                                      | Attrition          | Moderate | No loss to follow-up analyses were presented                             |
|                                      | Prognostic factor  | Low      | Prognostic factors were obtained from company data.                      |
|                                      | Outcome            | Low      | Outcome was diagnosed                                                    |
|                                      | Confounding        | High     | No adjustment for confounding was done                                   |
|                                      | Analysis/reporting | Low      | Adequate analyses were used                                              |
| 33. Martindale, 2018 <sup>51</sup>   | Participation      | High     | No non-responder analyses were presented, with substantial non-response. |
|                                      | Attrition          | Moderate | No loss to follow-up analyses were presented                             |
|                                      | Prognostic factor  | Moderate | Prognostic factors were obtained from an interview                       |
|                                      | Outcome            | Low      | Outcome was diagnosed during an interview                                |

|                                       |                    |          |                                                                                                               |
|---------------------------------------|--------------------|----------|---------------------------------------------------------------------------------------------------------------|
|                                       | Confounding        | High     | No adjustment for confounding was done                                                                        |
|                                       | Analysis/reporting | High     | No statistical analysis was done on the exposure-outcome association (only other analysis).                   |
| 34. Nagamine, 2018 <sup>52</sup>      | Participation      | Moderate | No non-responder analyses were presented                                                                      |
|                                       | Attrition          | Moderate | No loss to follow-up analyses were presented                                                                  |
|                                       | Prognostic factor  | Moderate | Prognostic factors were self-reported                                                                         |
|                                       | Outcome            | Moderate | Outcome was self-reported                                                                                     |
|                                       | Confounding        | High     | No adjustment for confounding was done                                                                        |
|                                       | Analysis/reporting | Low      | Adequate analyses were used                                                                                   |
| 35. Osorio, 2018 <sup>53</sup>        | Participation      | High     | A substantial amount of eligible participants did not participate. No non responder analysis was conducted.   |
|                                       | Attrition          | High     | A substantial amount of participants were lost in the follow-up. No loss to follow-up analysis was conducted. |
|                                       | Prognostic factor  | Moderate | Prognostic factors were self-reported                                                                         |
|                                       | Outcome            | Moderate | Outcome was self-reported                                                                                     |
|                                       | Confounding        | Low      | Confounding analyses were conducted                                                                           |
|                                       | Analysis/reporting | Low      | Adequate statistical analyses were performed.                                                                 |
| 36. Pihl-Thingvad, 2019 <sup>54</sup> | Participation      | Low      | Responders and non-responders did not differ substantially from one another (only in age)                     |
|                                       | Attrition          | Low      | Variables that predicted loss to follow-up (e.g. baseline PTSD) were adjusted for                             |
|                                       | Prognostic factor  | Moderate | Prognostic factors were self-reported                                                                         |
|                                       | Outcome            | Moderate | Outcome was self-reported                                                                                     |
|                                       | Confounding        | Low      | Confounding analyses were conducted                                                                           |
|                                       | Analysis/reporting | Low      | Adequate statistical analyses were performed.                                                                 |
| 37. Polusny, 2011 <sup>55</sup>       | Participation      | Moderate | There were slight differences between responders and non-responders                                           |
|                                       | Attrition          | Moderate | There were slight differences between those with and without follow-up data                                   |
|                                       | Prognostic factor  | Moderate | Prognostic factors were self-reported                                                                         |
|                                       | Outcome            | Moderate | Outcome was self-reported                                                                                     |
|                                       | Confounding        | Low      | Confounding analyses were conducted                                                                           |
|                                       | Analysis/reporting | Low      | Adequate statistical analyses were performed.                                                                 |
| 38. Reijnen, 2015 <sup>56</sup>       | Participation      | High     | There were substantial differences (e.g. in mental health) between responders and non-responders.             |
|                                       | Attrition          | High     | Participants without follow-up data were excluded. The above therefore also holds for those lost at follow-up |
|                                       | Prognostic factor  | Moderate | Prospective factors were self-reported                                                                        |
|                                       | Outcome            | Moderate | Outcome was self-reported                                                                                     |
|                                       | Confounding        | High     | No confounding adjustment was conducted                                                                       |

|                                   |                    |          |                                                            |
|-----------------------------------|--------------------|----------|------------------------------------------------------------|
|                                   | Analysis/reporting | Low      | Appropriate analyses were used.                            |
| 39. Shea, 2013 <sup>57</sup>      | Participation      | Moderate | It is unclear what the non-response in this study was      |
|                                   | Attrition          | Moderate | It is unclear what the loss to follow-up in this study was |
|                                   | Prognostic factor  | Moderate | Prognostic factors were self-reported                      |
|                                   | Outcome            | Low      | Outcome was diagnosed during a structured interview.       |
|                                   | Confounding        | Low      | Confounding analyses were conducted                        |
|                                   | Analysis/reporting | Low      | Adequate statistical analyses were performed.              |
| 40. Soo, 2011 <sup>58</sup>       | Participation      | Moderate | It is unclear what the non-response in this study was      |
|                                   | Attrition          | Moderate | It is unclear what the loss to follow-up in this study was |
|                                   | Prognostic factor  | Moderate | Prognostic factors were self-reported                      |
|                                   | Outcome            | Moderate | Outcome was self-reported                                  |
|                                   | Confounding        | Low      | Confounding analyses were conducted                        |
|                                   | Analysis/reporting | Low      | Adequate statistical analyses were performed.              |
| 41. Stevelink, 2018 <sup>59</sup> | Participation      | High     | There was substantial non-response                         |
|                                   | Attrition          | High     | There was substantial loss to follow-up                    |
|                                   | Prognostic factor  | Moderate | Prognostic factors were self-reported                      |
|                                   | Outcome            | Moderate | Outcomes were self-reported                                |
|                                   | Confounding        | Low      | Adjustment for confounding was performed.                  |
|                                   | Analysis/reporting | Low      | Adequate analyses were conducted                           |
| 42. Wittchen, 2012 <sup>60</sup>  | Participation      | Moderate | It is unclear what the non-response in this study was      |
|                                   | Attrition          | Moderate | It is unclear what the loss to follow-up in this study was |
|                                   | Prognostic factor  | Moderate | Prognostic factors were self-reported                      |
|                                   | Outcome            | Low      | Outcomes was diagnosed during a structured interview       |
|                                   | Confounding        | High     | No adjustment for confounding was performed                |
|                                   | Analysis/reporting | Low      | Adequate analyses were conducted                           |
