# Supplementary material for: What work-related exposures are associated with post-traumatic stress disorder? A systematic review with meta-analysis
Source: PubMed Central journal article supplement — BMJ Open. 2021 Aug 25;11(8):e049651. doi: 10.1136/bmjopen-2021-049651 (PMC8388294; doi:10.1136/bmjopen-2021-049651), 2021-08-25

Supplementary file 13. Forest plot depicting the effect of number of army deployments (one versus multiple) with PTSD, stratified for type of PTSD ascertainment.

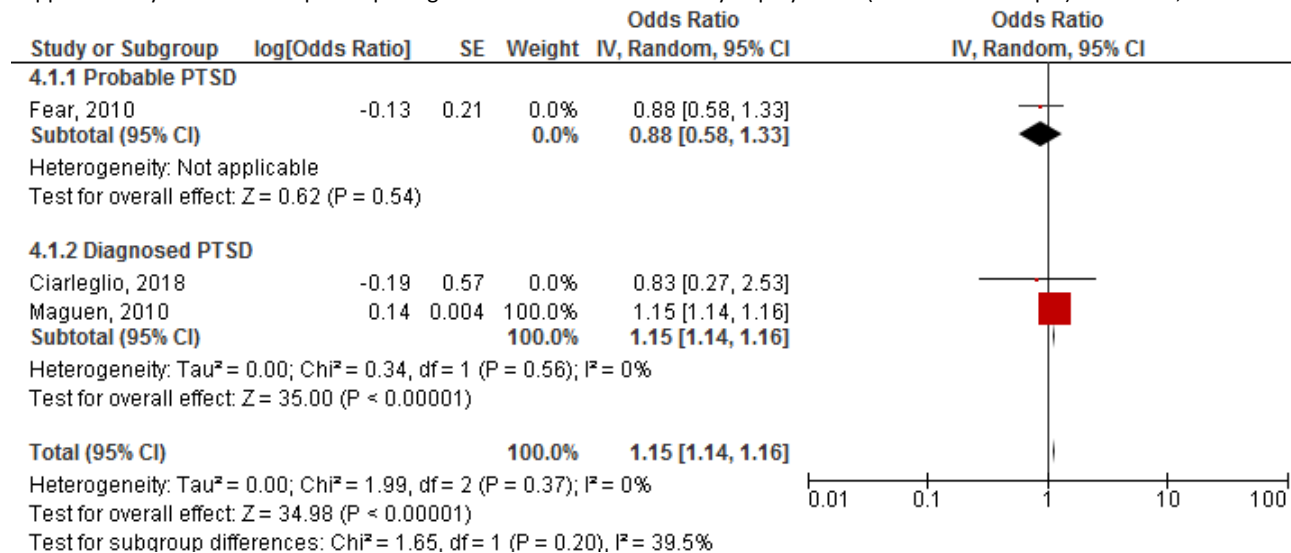

Supplement: bmjopen-2021-049651supp013.pdf [file bmjopen-2021-049651supp013.pdf]
