# Supplementary figures and images for: What work-related exposures are associated with post-traumatic stress disorder? A systematic review with meta-analysis
Source: PubMed Central journal article supplement — BMJ Open. 2021 Aug 25;11(8):e049651. doi: 10.1136/bmjopen-2021-049651 (PMC8388294; doi:10.1136/bmjopen-2021-049651), 2021-08-25

Supplementary file 6. Funnel plot, depicting the effect of combat exposure on PTSD.

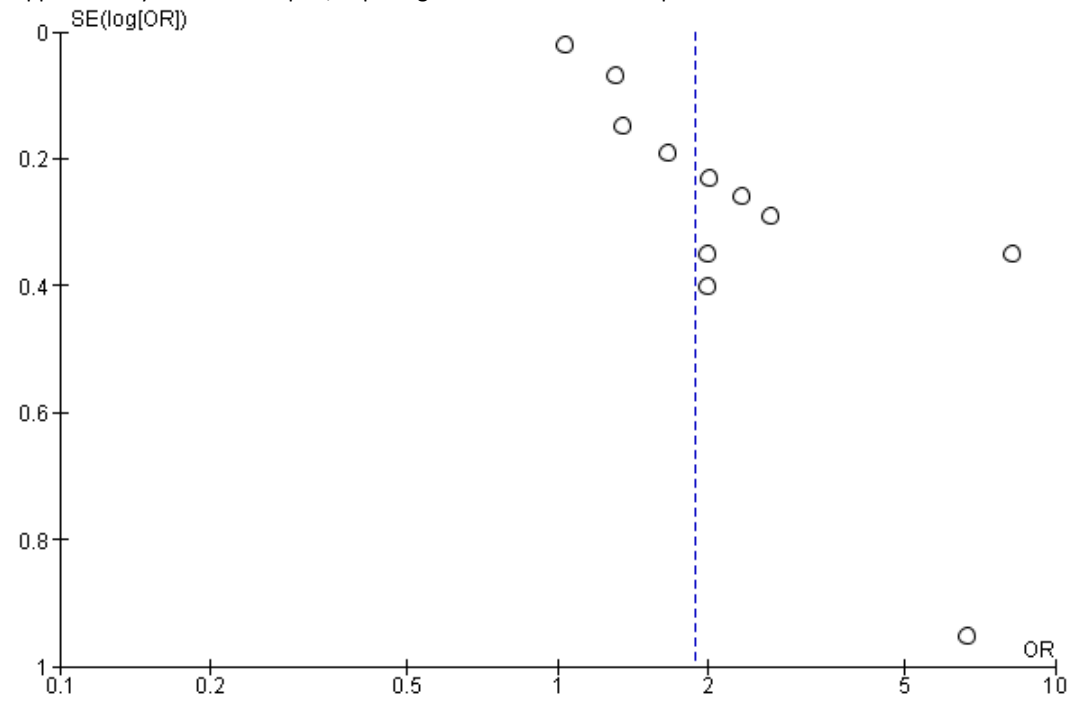

Supplement: bmjopen-2021-049651supp006.pdf [file bmjopen-2021-049651supp006.pdf]
